# Supplementary material for: SARS CoV-2 Genomic Characteristics and Clinical Impact of SARS-CoV-2 Viral Diversity in Critically Ill COVID-19 Patients: A Prospective Multicenter Cohort Study
Source: Research Square preprint supplement (doi:10.21203/rs.3.rs-1229021/v1), 2022-01-06
Supplement: Supplementary file 3 [file 4b35fa71cabe4f743ab17b71.docx]

**Supplemental Table 2.** Association between SARS-CoV-2 mutations and day-28 mortality

|  | Total | | Day-28 mortality | | | | | | | | | | | | |
| --- | --- | --- | --- | --- | --- | --- | --- | --- | --- | --- | --- | --- | --- | --- | --- |
|  |  | 0 | | | | | 1 | | | | | p-values | | |
| N=411 | | N=293 | | | | | N=118 | | | | |  |  |  |
| Qualitative variables | N | V% | N | OR | IC95% | IC95% | V% | N | OR | IC95% | IC95% | V% | p OR brut 1 | p Chi² | p Fisher |
| sub_ORF1b_N2695L | 3 | 0,7% | 0 |  |  |  | 0,0% | 3 | 17,79 | 0,91 | 347,07 | 2,5% | 0,058 | **0,006** | **0,023** |
| sub_ORF1b_K1873N | 2 | 0,5% | 0 |  |  |  | 0,0% | 2 | 12,60 | 0,60 | 264,36 | 1,7% | 0,103 | **0,025** | 0,082 |
| sub_N_P13T | 2 | 0,5% | 0 |  |  |  | 0,0% | 2 | 12,60 | 0,60 | 264,36 | 1,7% | 0,103 | **0,025** | 0,082 |
| sub_ORF9b_H9Q | 2 | 0,5% | 0 |  |  |  | 0,0% | 2 | 12,60 | 0,60 | 264,36 | 1,7% | 0,103 | **0,025** | 0,082 |
| sub_ORF1a_T1543I | 2 | 0,5% | 0 |  |  |  | 0,0% | 2 | 12,60 | 0,60 | 264,36 | 1,7% | 0,103 | **0,025** | 0,082 |
| sub_ORF1b_V1149L | 2 | 0,5% | 0 |  |  |  | 0,0% | 2 | 12,60 | 0,60 | 264,36 | 1,7% | 0,103 | **0,025** | 0,082 |
| sub_M_H125Y | 2 | 0,5% | 0 |  |  |  | 0,0% | 2 | 12,60 | 0,60 | 264,36 | 1,7% | 0,103 | **0,025** | 0,082 |
| sub_ORF1b_P1967S | 2 | 0,5% | 0 |  |  |  | 0,0% | 2 | 12,60 | 0,60 | 264,36 | 1,7% | 0,103 | **0,025** | 0,082 |
| sub_S_D796Y | 6 | 1,5% | 2 |  |  |  | 0,7% | 4 | 4,58 | 0,96 | 21,83 | 3,4% | 0,056 | **0,038** | 0,059 |
| sub_ORF8_I121X | 4 | 1,0% | 1 |  |  |  | 0,3% | 3 | 5,91 | 0,86 | 40,50 | 2,5% | 0,070 | **0,040** | 0,073 |
| ins__28250__G | 4 | 1,0% | 1 |  |  |  | 0,3% | 3 | 5,91 | 0,86 | 40,50 | 2,5% | 0,070 | **0,040** | 0,073 |
| sub_ORF1a_L3606F | 7 | 1,7% | 3 |  |  |  | 1,0% | 4 | 3,26 | 0,79 | 13,41 | 3,4% | 0,101 | 0,094 | 0,108 |
| sub_ORF3a_L53F | 1 | 0,2% | 0 |  |  |  | 0,0% | 1 | 7,49 | 0,30 | 185,27 | 0,8% | 0,218 | 0,115 | 0,287 |
| sub_S_P479H | 1 | 0,2% | 0 |  |  |  | 0,0% | 1 | 7,49 | 0,30 | 185,27 | 0,8% | 0,218 | 0,115 | 0,287 |
| sub_ORF1b_C650G | 1 | 0,2% | 0 |  |  |  | 0,0% | 1 | 7,49 | 0,30 | 185,27 | 0,8% | 0,218 | 0,115 | 0,287 |
| sub_ORF1b_S2312L | 1 | 0,2% | 0 |  |  |  | 0,0% | 1 | 7,49 | 0,30 | 185,27 | 0,8% | 0,218 | 0,115 | 0,287 |
| sub_ORF3a_F146L | 1 | 0,2% | 0 |  |  |  | 0,0% | 1 | 7,49 | 0,30 | 185,27 | 0,8% | 0,218 | 0,115 | 0,287 |
| sub_ORF1a_T677I | 1 | 0,2% | 0 |  |  |  | 0,0% | 1 | 7,49 | 0,30 | 185,27 | 0,8% | 0,218 | 0,115 | 0,287 |
| sub_ORF3a_R68T | 1 | 0,2% | 0 |  |  |  | 0,0% | 1 | 7,49 | 0,30 | 185,27 | 0,8% | 0,218 | 0,115 | 0,287 |
| sub_ORF1b_N1912D | 1 | 0,2% | 0 |  |  |  | 0,0% | 1 | 7,49 | 0,30 | 185,27 | 0,8% | 0,218 | 0,115 | 0,287 |
| sub_ORF1a_K4296R | 1 | 0,2% | 0 |  |  |  | 0,0% | 1 | 7,49 | 0,30 | 185,27 | 0,8% | 0,218 | 0,115 | 0,287 |
| sub_ORF7a_G38E | 1 | 0,2% | 0 |  |  |  | 0,0% | 1 | 7,49 | 0,30 | 185,27 | 0,8% | 0,218 | 0,115 | 0,287 |
| sub_S_Q784L | 1 | 0,2% | 0 |  |  |  | 0,0% | 1 | 7,49 | 0,30 | 185,27 | 0,8% | 0,218 | 0,115 | 0,287 |
| sub_ORF1b_P1664S | 1 | 0,2% | 0 |  |  |  | 0,0% | 1 | 7,49 | 0,30 | 185,27 | 0,8% | 0,218 | 0,115 | 0,287 |
| sub_M_A188E | 1 | 0,2% | 0 |  |  |  | 0,0% | 1 | 7,49 | 0,30 | 185,27 | 0,8% | 0,218 | 0,115 | 0,287 |
| sub_ORF1a_E1706D | 1 | 0,2% | 0 |  |  |  | 0,0% | 1 | 7,49 | 0,30 | 185,27 | 0,8% | 0,218 | 0,115 | 0,287 |
| sub_ORF1a_S142L | 1 | 0,2% | 0 |  |  |  | 0,0% | 1 | 7,49 | 0,30 | 185,27 | 0,8% | 0,218 | 0,115 | 0,287 |
| sub_ORF1a_G519S | 1 | 0,2% | 0 |  |  |  | 0,0% | 1 | 7,49 | 0,30 | 185,27 | 0,8% | 0,218 | 0,115 | 0,287 |
| sub_ORF8_S67F | 1 | 0,2% | 0 |  |  |  | 0,0% | 1 | 7,49 | 0,30 | 185,27 | 0,8% | 0,218 | 0,115 | 0,287 |
| sub_ORF1b_V2371L | 1 | 0,2% | 0 |  |  |  | 0,0% | 1 | 7,49 | 0,30 | 185,27 | 0,8% | 0,218 | 0,115 | 0,287 |
| sub_ORF6_Q8 | 1 | 0,2% | 0 |  |  |  | 0,0% | 1 | 7,49 | 0,30 | 185,27 | 0,8% | 0,218 | 0,115 | 0,287 |
| sub_ORF1b_D2270Y | 1 | 0,2% | 0 |  |  |  | 0,0% | 1 | 7,49 | 0,30 | 185,27 | 0,8% | 0,218 | 0,115 | 0,287 |
| sub_ORF8_P93L | 1 | 0,2% | 0 |  |  |  | 0,0% | 1 | 7,49 | 0,30 | 185,27 | 0,8% | 0,218 | 0,115 | 0,287 |
| sub_ORF1a_G2814V | 1 | 0,2% | 0 |  |  |  | 0,0% | 1 | 7,49 | 0,30 | 185,27 | 0,8% | 0,218 | 0,115 | 0,287 |
| sub_ORF1a_P3371S | 1 | 0,2% | 0 |  |  |  | 0,0% | 1 | 7,49 | 0,30 | 185,27 | 0,8% | 0,218 | 0,115 | 0,287 |
| sub_E_T30I | 1 | 0,2% | 0 |  |  |  | 0,0% | 1 | 7,49 | 0,30 | 185,27 | 0,8% | 0,218 | 0,115 | 0,287 |
| sub_ORF1a_K699R | 1 | 0,2% | 0 |  |  |  | 0,0% | 1 | 7,49 | 0,30 | 185,27 | 0,8% | 0,218 | 0,115 | 0,287 |
| sub_ORF1a_S3158G | 1 | 0,2% | 0 |  |  |  | 0,0% | 1 | 7,49 | 0,30 | 185,27 | 0,8% | 0,218 | 0,115 | 0,287 |
| sub_S_Q779E | 1 | 0,2% | 0 |  |  |  | 0,0% | 1 | 7,49 | 0,30 | 185,27 | 0,8% | 0,218 | 0,115 | 0,287 |
| sub_ORF1b_Q2425H | 1 | 0,2% | 0 |  |  |  | 0,0% | 1 | 7,49 | 0,30 | 185,27 | 0,8% | 0,218 | 0,115 | 0,287 |
| sub_ORF1b_N2426H | 1 | 0,2% | 0 |  |  |  | 0,0% | 1 | 7,49 | 0,30 | 185,27 | 0,8% | 0,218 | 0,115 | 0,287 |
| sub_ORF1a_V3166F | 1 | 0,2% | 0 |  |  |  | 0,0% | 1 | 7,49 | 0,30 | 185,27 | 0,8% | 0,218 | 0,115 | 0,287 |
| sub_ORF1b_A1432S | 1 | 0,2% | 0 |  |  |  | 0,0% | 1 | 7,49 | 0,30 | 185,27 | 0,8% | 0,218 | 0,115 | 0,287 |
| sub_S_G72E | 1 | 0,2% | 0 |  |  |  | 0,0% | 1 | 7,49 | 0,30 | 185,27 | 0,8% | 0,218 | 0,115 | 0,287 |
| sub_S_V127F | 1 | 0,2% | 0 |  |  |  | 0,0% | 1 | 7,49 | 0,30 | 185,27 | 0,8% | 0,218 | 0,115 | 0,287 |
| sub_S_A262S | 1 | 0,2% | 0 |  |  |  | 0,0% | 1 | 7,49 | 0,30 | 185,27 | 0,8% | 0,218 | 0,115 | 0,287 |
| sub_S_A1020V | 1 | 0,2% | 0 |  |  |  | 0,0% | 1 | 7,49 | 0,30 | 185,27 | 0,8% | 0,218 | 0,115 | 0,287 |
| sub_ORF1a_T2121I | 1 | 0,2% | 0 |  |  |  | 0,0% | 1 | 7,49 | 0,30 | 185,27 | 0,8% | 0,218 | 0,115 | 0,287 |
| sub_ORF1a_A3070V | 1 | 0,2% | 0 |  |  |  | 0,0% | 1 | 7,49 | 0,30 | 185,27 | 0,8% | 0,218 | 0,115 | 0,287 |
| sub_ORF1b_V1642I | 1 | 0,2% | 0 |  |  |  | 0,0% | 1 | 7,49 | 0,30 | 185,27 | 0,8% | 0,218 | 0,115 | 0,287 |
| sub_ORF1b_E1728G | 1 | 0,2% | 0 |  |  |  | 0,0% | 1 | 7,49 | 0,30 | 185,27 | 0,8% | 0,218 | 0,115 | 0,287 |
| sub_ORF9b_P10L | 1 | 0,2% | 0 |  |  |  | 0,0% | 1 | 7,49 | 0,30 | 185,27 | 0,8% | 0,218 | 0,115 | 0,287 |
| sub_ORF1a_S166G | 1 | 0,2% | 0 |  |  |  | 0,0% | 1 | 7,49 | 0,30 | 185,27 | 0,8% | 0,218 | 0,115 | 0,287 |
| sub_S_K97E | 1 | 0,2% | 0 |  |  |  | 0,0% | 1 | 7,49 | 0,30 | 185,27 | 0,8% | 0,218 | 0,115 | 0,287 |
| sub_ORF3a_K21N | 1 | 0,2% | 0 |  |  |  | 0,0% | 1 | 7,49 | 0,30 | 185,27 | 0,8% | 0,218 | 0,115 | 0,287 |
| sub_ORF1b_P2321S | 1 | 0,2% | 0 |  |  |  | 0,0% | 1 | 7,49 | 0,30 | 185,27 | 0,8% | 0,218 | 0,115 | 0,287 |
| sub_ORF1b_P2394T | 1 | 0,2% | 0 |  |  |  | 0,0% | 1 | 7,49 | 0,30 | 185,27 | 0,8% | 0,218 | 0,115 | 0,287 |
| sub_ORF1a_T2186K | 1 | 0,2% | 0 |  |  |  | 0,0% | 1 | 7,49 | 0,30 | 185,27 | 0,8% | 0,218 | 0,115 | 0,287 |
| sub_ORF1b_R1226C | 1 | 0,2% | 0 |  |  |  | 0,0% | 1 | 7,49 | 0,30 | 185,27 | 0,8% | 0,218 | 0,115 | 0,287 |
| sub_ORF3a_F207L | 1 | 0,2% | 0 |  |  |  | 0,0% | 1 | 7,49 | 0,30 | 185,27 | 0,8% | 0,218 | 0,115 | 0,287 |
| sub_ORF1b_A517S | 1 | 0,2% | 0 |  |  |  | 0,0% | 1 | 7,49 | 0,30 | 185,27 | 0,8% | 0,218 | 0,115 | 0,287 |
| sub_ORF1b_A1215S | 1 | 0,2% | 0 |  |  |  | 0,0% | 1 | 7,49 | 0,30 | 185,27 | 0,8% | 0,218 | 0,115 | 0,287 |
| sub_S_T19K | 1 | 0,2% | 0 |  |  |  | 0,0% | 1 | 7,49 | 0,30 | 185,27 | 0,8% | 0,218 | 0,115 | 0,287 |
| sub_ORF1a_S2981F | 1 | 0,2% | 0 |  |  |  | 0,0% | 1 | 7,49 | 0,30 | 185,27 | 0,8% | 0,218 | 0,115 | 0,287 |
| sub_ORF3a_R30C | 1 | 0,2% | 0 |  |  |  | 0,0% | 1 | 7,49 | 0,30 | 185,27 | 0,8% | 0,218 | 0,115 | 0,287 |
| sub_ORF1a_L4040F | 1 | 0,2% | 0 |  |  |  | 0,0% | 1 | 7,49 | 0,30 | 185,27 | 0,8% | 0,218 | 0,115 | 0,287 |
| sub_N_P199S | 1 | 0,2% | 0 |  |  |  | 0,0% | 1 | 7,49 | 0,30 | 185,27 | 0,8% | 0,218 | 0,115 | 0,287 |
| sub_ORF1a_N2454C | 1 | 0,2% | 0 |  |  |  | 0,0% | 1 | 7,49 | 0,30 | 185,27 | 0,8% | 0,218 | 0,115 | 0,287 |
| sub_E_T9I | 1 | 0,2% | 0 |  |  |  | 0,0% | 1 | 7,49 | 0,30 | 185,27 | 0,8% | 0,218 | 0,115 | 0,287 |
| sub_ORF1a_L384F | 1 | 0,2% | 0 |  |  |  | 0,0% | 1 | 7,49 | 0,30 | 185,27 | 0,8% | 0,218 | 0,115 | 0,287 |
| sub_ORF1a_S653L | 1 | 0,2% | 0 |  |  |  | 0,0% | 1 | 7,49 | 0,30 | 185,27 | 0,8% | 0,218 | 0,115 | 0,287 |
| sub_ORF1a_E2053G | 1 | 0,2% | 0 |  |  |  | 0,0% | 1 | 7,49 | 0,30 | 185,27 | 0,8% | 0,218 | 0,115 | 0,287 |
| sub_ORF1b_N480S | 1 | 0,2% | 0 |  |  |  | 0,0% | 1 | 7,49 | 0,30 | 185,27 | 0,8% | 0,218 | 0,115 | 0,287 |
| sub_ORF1a_K3832N | 1 | 0,2% | 0 |  |  |  | 0,0% | 1 | 7,49 | 0,30 | 185,27 | 0,8% | 0,218 | 0,115 | 0,287 |
| sub_ORF3a_V256F | 1 | 0,2% | 0 |  |  |  | 0,0% | 1 | 7,49 | 0,30 | 185,27 | 0,8% | 0,218 | 0,115 | 0,287 |
| sub_ORF1a_F3085L | 1 | 0,2% | 0 |  |  |  | 0,0% | 1 | 7,49 | 0,30 | 185,27 | 0,8% | 0,218 | 0,115 | 0,287 |
| sub_ORF1b_Y113H | 1 | 0,2% | 0 |  |  |  | 0,0% | 1 | 7,49 | 0,30 | 185,27 | 0,8% | 0,218 | 0,115 | 0,287 |
| sub_ORF1a_T183I | 1 | 0,2% | 0 |  |  |  | 0,0% | 1 | 7,49 | 0,30 | 185,27 | 0,8% | 0,218 | 0,115 | 0,287 |
| sub_ORF1a_S1361F | 1 | 0,2% | 0 |  |  |  | 0,0% | 1 | 7,49 | 0,30 | 185,27 | 0,8% | 0,218 | 0,115 | 0,287 |
| sub_ORF1a_A2344V | 1 | 0,2% | 0 |  |  |  | 0,0% | 1 | 7,49 | 0,30 | 185,27 | 0,8% | 0,218 | 0,115 | 0,287 |
| sub_ORF1b_G1568S | 1 | 0,2% | 0 |  |  |  | 0,0% | 1 | 7,49 | 0,30 | 185,27 | 0,8% | 0,218 | 0,115 | 0,287 |
| sub_ORF1b_I1987V | 1 | 0,2% | 0 |  |  |  | 0,0% | 1 | 7,49 | 0,30 | 185,27 | 0,8% | 0,218 | 0,115 | 0,287 |
| sub_S_T572I | 1 | 0,2% | 0 |  |  |  | 0,0% | 1 | 7,49 | 0,30 | 185,27 | 0,8% | 0,218 | 0,115 | 0,287 |
| sub_S_Q613H | 1 | 0,2% | 0 |  |  |  | 0,0% | 1 | 7,49 | 0,30 | 185,27 | 0,8% | 0,218 | 0,115 | 0,287 |
| sub_ORF1a_V1431I | 1 | 0,2% | 0 |  |  |  | 0,0% | 1 | 7,49 | 0,30 | 185,27 | 0,8% | 0,218 | 0,115 | 0,287 |
| sub_S_I670V | 1 | 0,2% | 0 |  |  |  | 0,0% | 1 | 7,49 | 0,30 | 185,27 | 0,8% | 0,218 | 0,115 | 0,287 |
| sub_ORF3a_L85F | 1 | 0,2% | 0 |  |  |  | 0,0% | 1 | 7,49 | 0,30 | 185,27 | 0,8% | 0,218 | 0,115 | 0,287 |
| sub_S_Q779R | 1 | 0,2% | 0 |  |  |  | 0,0% | 1 | 7,49 | 0,30 | 185,27 | 0,8% | 0,218 | 0,115 | 0,287 |
| sub_N_Q28H | 1 | 0,2% | 0 |  |  |  | 0,0% | 1 | 7,49 | 0,30 | 185,27 | 0,8% | 0,218 | 0,115 | 0,287 |
| sub_ORF1a_N2623S | 1 | 0,2% | 0 |  |  |  | 0,0% | 1 | 7,49 | 0,30 | 185,27 | 0,8% | 0,218 | 0,115 | 0,287 |
| sub_ORF1a_M3862I | 1 | 0,2% | 0 |  |  |  | 0,0% | 1 | 7,49 | 0,30 | 185,27 | 0,8% | 0,218 | 0,115 | 0,287 |
| sub_ORF9b_R25I | 1 | 0,2% | 0 |  |  |  | 0,0% | 1 | 7,49 | 0,30 | 185,27 | 0,8% | 0,218 | 0,115 | 0,287 |
| sub_ORF1a_Y1452F | 1 | 0,2% | 0 |  |  |  | 0,0% | 1 | 7,49 | 0,30 | 185,27 | 0,8% | 0,218 | 0,115 | 0,287 |
| sub_ORF1a_D2094A | 1 | 0,2% | 0 |  |  |  | 0,0% | 1 | 7,49 | 0,30 | 185,27 | 0,8% | 0,218 | 0,115 | 0,287 |
| sub_ORF1b_T67I | 1 | 0,2% | 0 |  |  |  | 0,0% | 1 | 7,49 | 0,30 | 185,27 | 0,8% | 0,218 | 0,115 | 0,287 |
| sub_ORF1b_C2422S | 1 | 0,2% | 0 |  |  |  | 0,0% | 1 | 7,49 | 0,30 | 185,27 | 0,8% | 0,218 | 0,115 | 0,287 |
| sub_ORF3a_L108F | 1 | 0,2% | 0 |  |  |  | 0,0% | 1 | 7,49 | 0,30 | 185,27 | 0,8% | 0,218 | 0,115 | 0,287 |
| sub_N_G212V | 1 | 0,2% | 0 |  |  |  | 0,0% | 1 | 7,49 | 0,30 | 185,27 | 0,8% | 0,218 | 0,115 | 0,287 |
| sub_N_T334I | 1 | 0,2% | 0 |  |  |  | 0,0% | 1 | 7,49 | 0,30 | 185,27 | 0,8% | 0,218 | 0,115 | 0,287 |
| sub_ORF1a_A516V | 1 | 0,2% | 0 |  |  |  | 0,0% | 1 | 7,49 | 0,30 | 185,27 | 0,8% | 0,218 | 0,115 | 0,287 |
| sub_ORF1a_V2754I | 1 | 0,2% | 0 |  |  |  | 0,0% | 1 | 7,49 | 0,30 | 185,27 | 0,8% | 0,218 | 0,115 | 0,287 |
| sub_ORF6_W27L | 1 | 0,2% | 0 |  |  |  | 0,0% | 1 | 7,49 | 0,30 | 185,27 | 0,8% | 0,218 | 0,115 | 0,287 |
| sub_ORF1a_Q607H | 1 | 0,2% | 0 |  |  |  | 0,0% | 1 | 7,49 | 0,30 | 185,27 | 0,8% | 0,218 | 0,115 | 0,287 |
| sub_ORF1a_V1143F | 1 | 0,2% | 0 |  |  |  | 0,0% | 1 | 7,49 | 0,30 | 185,27 | 0,8% | 0,218 | 0,115 | 0,287 |
| sub_ORF1a_T1277I | 1 | 0,2% | 0 |  |  |  | 0,0% | 1 | 7,49 | 0,30 | 185,27 | 0,8% | 0,218 | 0,115 | 0,287 |
| sub_ORF1b_M620T | 1 | 0,2% | 0 |  |  |  | 0,0% | 1 | 7,49 | 0,30 | 185,27 | 0,8% | 0,218 | 0,115 | 0,287 |
| sub_ORF8_P30L | 1 | 0,2% | 0 |  |  |  | 0,0% | 1 | 7,49 | 0,30 | 185,27 | 0,8% | 0,218 | 0,115 | 0,287 |
| sub_N_D128H | 1 | 0,2% | 0 |  |  |  | 0,0% | 1 | 7,49 | 0,30 | 185,27 | 0,8% | 0,218 | 0,115 | 0,287 |
| sub_ORF1b_D1028G | 1 | 0,2% | 0 |  |  |  | 0,0% | 1 | 7,49 | 0,30 | 185,27 | 0,8% | 0,218 | 0,115 | 0,287 |
| sub_ORF8_F86L | 1 | 0,2% | 0 |  |  |  | 0,0% | 1 | 7,49 | 0,30 | 185,27 | 0,8% | 0,218 | 0,115 | 0,287 |
| sub_ORF1a_P943S | 1 | 0,2% | 0 |  |  |  | 0,0% | 1 | 7,49 | 0,30 | 185,27 | 0,8% | 0,218 | 0,115 | 0,287 |
| sub_ORF1a_V1056L | 1 | 0,2% | 0 |  |  |  | 0,0% | 1 | 7,49 | 0,30 | 185,27 | 0,8% | 0,218 | 0,115 | 0,287 |
| sub_ORF1a_V2943I | 1 | 0,2% | 0 |  |  |  | 0,0% | 1 | 7,49 | 0,30 | 185,27 | 0,8% | 0,218 | 0,115 | 0,287 |
| sub_ORF3a_D27G | 1 | 0,2% | 0 |  |  |  | 0,0% | 1 | 7,49 | 0,30 | 185,27 | 0,8% | 0,218 | 0,115 | 0,287 |
| sub_ORF8_H40Y | 1 | 0,2% | 0 |  |  |  | 0,0% | 1 | 7,49 | 0,30 | 185,27 | 0,8% | 0,218 | 0,115 | 0,287 |
| sub_ORF1a_R3368H | 1 | 0,2% | 0 |  |  |  | 0,0% | 1 | 7,49 | 0,30 | 185,27 | 0,8% | 0,218 | 0,115 | 0,287 |
| sub_ORF1b_L820F | 1 | 0,2% | 0 |  |  |  | 0,0% | 1 | 7,49 | 0,30 | 185,27 | 0,8% | 0,218 | 0,115 | 0,287 |
| sub_M_M109I | 1 | 0,2% | 0 |  |  |  | 0,0% | 1 | 7,49 | 0,30 | 185,27 | 0,8% | 0,218 | 0,115 | 0,287 |
| sub_ORF3a_H78Y | 1 | 0,2% | 0 |  |  |  | 0,0% | 1 | 7,49 | 0,30 | 185,27 | 0,8% | 0,218 | 0,115 | 0,287 |
| sub_ORF7a_C67X | 1 | 0,2% | 0 |  |  |  | 0,0% | 1 | 7,49 | 0,30 | 185,27 | 0,8% | 0,218 | 0,115 | 0,287 |
| sub_ORF1b_D1183N | 1 | 0,2% | 0 |  |  |  | 0,0% | 1 | 7,49 | 0,30 | 185,27 | 0,8% | 0,218 | 0,115 | 0,287 |
| sub_ORF1a_I1005L | 1 | 0,2% | 0 |  |  |  | 0,0% | 1 | 7,49 | 0,30 | 185,27 | 0,8% | 0,218 | 0,115 | 0,287 |
| sub_ORF1b_T1511I | 1 | 0,2% | 0 |  |  |  | 0,0% | 1 | 7,49 | 0,30 | 185,27 | 0,8% | 0,218 | 0,115 | 0,287 |
| sub_ORF1b_T2548I | 1 | 0,2% | 0 |  |  |  | 0,0% | 1 | 7,49 | 0,30 | 185,27 | 0,8% | 0,218 | 0,115 | 0,287 |
| sub_ORF3a_L52F | 1 | 0,2% | 0 |  |  |  | 0,0% | 1 | 7,49 | 0,30 | 185,27 | 0,8% | 0,218 | 0,115 | 0,287 |
| sub_ORF8_V32L | 1 | 0,2% | 0 |  |  |  | 0,0% | 1 | 7,49 | 0,30 | 185,27 | 0,8% | 0,218 | 0,115 | 0,287 |
| sub_N_R195I | 1 | 0,2% | 0 |  |  |  | 0,0% | 1 | 7,49 | 0,30 | 185,27 | 0,8% | 0,218 | 0,115 | 0,287 |
| sub_ORF1a_F1959I | 1 | 0,2% | 0 |  |  |  | 0,0% | 1 | 7,49 | 0,30 | 185,27 | 0,8% | 0,218 | 0,115 | 0,287 |
| sub_ORF6_I26V | 1 | 0,2% | 0 |  |  |  | 0,0% | 1 | 7,49 | 0,30 | 185,27 | 0,8% | 0,218 | 0,115 | 0,287 |
| sub_N_G204P | 1 | 0,2% | 0 |  |  |  | 0,0% | 1 | 7,49 | 0,30 | 185,27 | 0,8% | 0,218 | 0,115 | 0,287 |
| sub_ORF1a_P3447S | 1 | 0,2% | 0 |  |  |  | 0,0% | 1 | 7,49 | 0,30 | 185,27 | 0,8% | 0,218 | 0,115 | 0,287 |
| sub_ORF1a_K669E | 1 | 0,2% | 0 |  |  |  | 0,0% | 1 | 7,49 | 0,30 | 185,27 | 0,8% | 0,218 | 0,115 | 0,287 |
| sub_ORF1b_L1681F | 1 | 0,2% | 0 |  |  |  | 0,0% | 1 | 7,49 | 0,30 | 185,27 | 0,8% | 0,218 | 0,115 | 0,287 |
| sub_ORF1b_V1685I | 1 | 0,2% | 0 |  |  |  | 0,0% | 1 | 7,49 | 0,30 | 185,27 | 0,8% | 0,218 | 0,115 | 0,287 |
| sub_S_T76I | 1 | 0,2% | 0 |  |  |  | 0,0% | 1 | 7,49 | 0,30 | 185,27 | 0,8% | 0,218 | 0,115 | 0,287 |
| sub_ORF1a_S2488F | 1 | 0,2% | 0 |  |  |  | 0,0% | 1 | 7,49 | 0,30 | 185,27 | 0,8% | 0,218 | 0,115 | 0,287 |
| sub_E_F20L | 1 | 0,2% | 0 |  |  |  | 0,0% | 1 | 7,49 | 0,30 | 185,27 | 0,8% | 0,218 | 0,115 | 0,287 |
| sub_ORF1a_A1204V | 1 | 0,2% | 0 |  |  |  | 0,0% | 1 | 7,49 | 0,30 | 185,27 | 0,8% | 0,218 | 0,115 | 0,287 |
| sub_ORF1b_S997L | 1 | 0,2% | 0 |  |  |  | 0,0% | 1 | 7,49 | 0,30 | 185,27 | 0,8% | 0,218 | 0,115 | 0,287 |
| sub_S_I834T | 1 | 0,2% | 0 |  |  |  | 0,0% | 1 | 7,49 | 0,30 | 185,27 | 0,8% | 0,218 | 0,115 | 0,287 |
| sub_N_T271K | 1 | 0,2% | 0 |  |  |  | 0,0% | 1 | 7,49 | 0,30 | 185,27 | 0,8% | 0,218 | 0,115 | 0,287 |
| sub_ORF1a_Y2003 | 1 | 0,2% | 0 |  |  |  | 0,0% | 1 | 7,49 | 0,30 | 185,27 | 0,8% | 0,218 | 0,115 | 0,287 |
| sub_ORF1b_K64N | 1 | 0,2% | 0 |  |  |  | 0,0% | 1 | 7,49 | 0,30 | 185,27 | 0,8% | 0,218 | 0,115 | 0,287 |
| sub_S_K182R | 1 | 0,2% | 0 |  |  |  | 0,0% | 1 | 7,49 | 0,30 | 185,27 | 0,8% | 0,218 | 0,115 | 0,287 |
| sub_S_Q1142E | 1 | 0,2% | 0 |  |  |  | 0,0% | 1 | 7,49 | 0,30 | 185,27 | 0,8% | 0,218 | 0,115 | 0,287 |
| sub_N_A398S | 1 | 0,2% | 0 |  |  |  | 0,0% | 1 | 7,49 | 0,30 | 185,27 | 0,8% | 0,218 | 0,115 | 0,287 |
| sub_ORF1a_E2088G | 1 | 0,2% | 0 |  |  |  | 0,0% | 1 | 7,49 | 0,30 | 185,27 | 0,8% | 0,218 | 0,115 | 0,287 |
| sub_ORF1b_A2268S | 1 | 0,2% | 0 |  |  |  | 0,0% | 1 | 7,49 | 0,30 | 185,27 | 0,8% | 0,218 | 0,115 | 0,287 |
| sub_ORF1b_G2337V | 1 | 0,2% | 0 |  |  |  | 0,0% | 1 | 7,49 | 0,30 | 185,27 | 0,8% | 0,218 | 0,115 | 0,287 |
| sub_S_P25S | 1 | 0,2% | 0 |  |  |  | 0,0% | 1 | 7,49 | 0,30 | 185,27 | 0,8% | 0,218 | 0,115 | 0,287 |
| sub_ORF1a_A540V | 1 | 0,2% | 0 |  |  |  | 0,0% | 1 | 7,49 | 0,30 | 185,27 | 0,8% | 0,218 | 0,115 | 0,287 |
| sub_ORF1a_A599V | 1 | 0,2% | 0 |  |  |  | 0,0% | 1 | 7,49 | 0,30 | 185,27 | 0,8% | 0,218 | 0,115 | 0,287 |
| sub_ORF1a_A3209V | 1 | 0,2% | 0 |  |  |  | 0,0% | 1 | 7,49 | 0,30 | 185,27 | 0,8% | 0,218 | 0,115 | 0,287 |
| sub_ORF1a_T3461A | 1 | 0,2% | 0 |  |  |  | 0,0% | 1 | 7,49 | 0,30 | 185,27 | 0,8% | 0,218 | 0,115 | 0,287 |
| sub_ORF1a_V3510I | 1 | 0,2% | 0 |  |  |  | 0,0% | 1 | 7,49 | 0,30 | 185,27 | 0,8% | 0,218 | 0,115 | 0,287 |
| sub_ORF1b_M1197I | 1 | 0,2% | 0 |  |  |  | 0,0% | 1 | 7,49 | 0,30 | 185,27 | 0,8% | 0,218 | 0,115 | 0,287 |
| sub_ORF6_R20S | 1 | 0,2% | 0 |  |  |  | 0,0% | 1 | 7,49 | 0,30 | 185,27 | 0,8% | 0,218 | 0,115 | 0,287 |
| sub_S_A522S | 1 | 0,2% | 0 |  |  |  | 0,0% | 1 | 7,49 | 0,30 | 185,27 | 0,8% | 0,218 | 0,115 | 0,287 |
| sub_N_A156S | 1 | 0,2% | 0 |  |  |  | 0,0% | 1 | 7,49 | 0,30 | 185,27 | 0,8% | 0,218 | 0,115 | 0,287 |
| sub_ORF1b_P1953S | 1 | 0,2% | 0 |  |  |  | 0,0% | 1 | 7,49 | 0,30 | 185,27 | 0,8% | 0,218 | 0,115 | 0,287 |
| sub_ORF1b_G2510C | 1 | 0,2% | 0 |  |  |  | 0,0% | 1 | 7,49 | 0,30 | 185,27 | 0,8% | 0,218 | 0,115 | 0,287 |
| sub_E_F4S | 1 | 0,2% | 0 |  |  |  | 0,0% | 1 | 7,49 | 0,30 | 185,27 | 0,8% | 0,218 | 0,115 | 0,287 |
| sub_ORF1a_P80H | 1 | 0,2% | 0 |  |  |  | 0,0% | 1 | 7,49 | 0,30 | 185,27 | 0,8% | 0,218 | 0,115 | 0,287 |
| sub_ORF1a_G1119C | 1 | 0,2% | 0 |  |  |  | 0,0% | 1 | 7,49 | 0,30 | 185,27 | 0,8% | 0,218 | 0,115 | 0,287 |
| sub_ORF1a_D1554E | 1 | 0,2% | 0 |  |  |  | 0,0% | 1 | 7,49 | 0,30 | 185,27 | 0,8% | 0,218 | 0,115 | 0,287 |
| sub_ORF1a_L2738S | 1 | 0,2% | 0 |  |  |  | 0,0% | 1 | 7,49 | 0,30 | 185,27 | 0,8% | 0,218 | 0,115 | 0,287 |
| sub_ORF1a_L3198V | 1 | 0,2% | 0 |  |  |  | 0,0% | 1 | 7,49 | 0,30 | 185,27 | 0,8% | 0,218 | 0,115 | 0,287 |
| sub_ORF1a_G3809D | 1 | 0,2% | 0 |  |  |  | 0,0% | 1 | 7,49 | 0,30 | 185,27 | 0,8% | 0,218 | 0,115 | 0,287 |
| sub_ORF1b_A2145V | 1 | 0,2% | 0 |  |  |  | 0,0% | 1 | 7,49 | 0,30 | 185,27 | 0,8% | 0,218 | 0,115 | 0,287 |
| sub_S_L996F | 1 | 0,2% | 0 |  |  |  | 0,0% | 1 | 7,49 | 0,30 | 185,27 | 0,8% | 0,218 | 0,115 | 0,287 |
| sub_ORF1b_D1183Y | 1 | 0,2% | 0 |  |  |  | 0,0% | 1 | 7,49 | 0,30 | 185,27 | 0,8% | 0,218 | 0,115 | 0,287 |
| sub_ORF1a_Y359H | 1 | 0,2% | 0 |  |  |  | 0,0% | 1 | 7,49 | 0,30 | 185,27 | 0,8% | 0,218 | 0,115 | 0,287 |
| sub_ORF1a_D2101A | 1 | 0,2% | 0 |  |  |  | 0,0% | 1 | 7,49 | 0,30 | 185,27 | 0,8% | 0,218 | 0,115 | 0,287 |
| sub_ORF1a_I2311N | 1 | 0,2% | 0 |  |  |  | 0,0% | 1 | 7,49 | 0,30 | 185,27 | 0,8% | 0,218 | 0,115 | 0,287 |
| sub_ORF1a_V3810A | 1 | 0,2% | 0 |  |  |  | 0,0% | 1 | 7,49 | 0,30 | 185,27 | 0,8% | 0,218 | 0,115 | 0,287 |
| sub_S_Y144F | 1 | 0,2% | 0 |  |  |  | 0,0% | 1 | 7,49 | 0,30 | 185,27 | 0,8% | 0,218 | 0,115 | 0,287 |
| sub_S_V1129E | 1 | 0,2% | 0 |  |  |  | 0,0% | 1 | 7,49 | 0,30 | 185,27 | 0,8% | 0,218 | 0,115 | 0,287 |
| sub_N_A152S | 1 | 0,2% | 0 |  |  |  | 0,0% | 1 | 7,49 | 0,30 | 185,27 | 0,8% | 0,218 | 0,115 | 0,287 |
| sub_ORF1a_T2872M | 1 | 0,2% | 0 |  |  |  | 0,0% | 1 | 7,49 | 0,30 | 185,27 | 0,8% | 0,218 | 0,115 | 0,287 |
| sub_ORF1b_D1024G | 1 | 0,2% | 0 |  |  |  | 0,0% | 1 | 7,49 | 0,30 | 185,27 | 0,8% | 0,218 | 0,115 | 0,287 |
| sub_S_N30Y | 1 | 0,2% | 0 |  |  |  | 0,0% | 1 | 7,49 | 0,30 | 185,27 | 0,8% | 0,218 | 0,115 | 0,287 |
| sub_S_M153I | 1 | 0,2% | 0 |  |  |  | 0,0% | 1 | 7,49 | 0,30 | 185,27 | 0,8% | 0,218 | 0,115 | 0,287 |
| sub_ORF1a_N786K | 1 | 0,2% | 0 |  |  |  | 0,0% | 1 | 7,49 | 0,30 | 185,27 | 0,8% | 0,218 | 0,115 | 0,287 |
| sub_ORF1a_P2046L | 1 | 0,2% | 0 |  |  |  | 0,0% | 1 | 7,49 | 0,30 | 185,27 | 0,8% | 0,218 | 0,115 | 0,287 |
| sub_ORF1a_C3423Y | 1 | 0,2% | 0 |  |  |  | 0,0% | 1 | 7,49 | 0,30 | 185,27 | 0,8% | 0,218 | 0,115 | 0,287 |
| sub_ORF1a_P3952S | 6 | 1,5% | 6 |  |  |  | 2,0% | 0 | 0,19 | 0,01 | 3,34 | 0,0% | 0,254 | 0,117 | 0,189 |
| sub_ORF3a_S166L | 6 | 1,5% | 6 |  |  |  | 2,0% | 0 | 0,19 | 0,01 | 3,34 | 0,0% | 0,254 | 0,117 | 0,189 |
| sub_S_G181R | 6 | 1,5% | 6 |  |  |  | 2,0% | 0 | 0,19 | 0,01 | 3,34 | 0,0% | 0,254 | 0,117 | 0,189 |
| sub_ORF3a_S216P | 5 | 1,2% | 2 |  |  |  | 0,7% | 3 | 3,53 | 0,69 | 18,16 | 2,5% | 0,131 | 0,120 | 0,145 |
| sub_ORF1a_M3087I | 98 | 23,8% | 64 |  |  |  | 21,8% | 34 | 1,45 | 0,90 | 2,35 | 28,8% | 0,130 | 0,134 | 0,159 |
| sub_ORF1b_P1414S | 3 | 0,7% | 1 |  |  |  | 0,3% | 2 | 4,18 | 0,55 | 32,04 | 1,7% | 0,168 | 0,145 | 0,199 |
| sub_ORF1a_L92F | 3 | 0,7% | 1 |  |  |  | 0,3% | 2 | 4,18 | 0,55 | 32,04 | 1,7% | 0,168 | 0,145 | 0,199 |
| sub_ORF1a_A2785T | 3 | 0,7% | 1 |  |  |  | 0,3% | 2 | 4,18 | 0,55 | 32,04 | 1,7% | 0,168 | 0,145 | 0,199 |
| sub_ORF8_T26N | 3 | 0,7% | 1 |  |  |  | 0,3% | 2 | 4,18 | 0,55 | 32,04 | 1,7% | 0,168 | 0,145 | 0,199 |
| sub_ORF7a_G38V | 3 | 0,7% | 1 |  |  |  | 0,3% | 2 | 4,18 | 0,55 | 32,04 | 1,7% | 0,168 | 0,145 | 0,199 |
| sub_E_A32V | 3 | 0,7% | 1 |  |  |  | 0,3% | 2 | 4,18 | 0,55 | 32,04 | 1,7% | 0,168 | 0,145 | 0,199 |
| sub_ORF1a_A3220V | 3 | 0,7% | 1 |  |  |  | 0,3% | 2 | 4,18 | 0,55 | 32,04 | 1,7% | 0,168 | 0,145 | 0,199 |
| sub_ORF1a_G1125C | 3 | 0,7% | 1 |  |  |  | 0,3% | 2 | 4,18 | 0,55 | 32,04 | 1,7% | 0,168 | 0,145 | 0,199 |
| sub_S_S477N | 76 | 18,5% | 49 |  |  |  | 16,7% | 27 | 1,48 | 0,88 | 2,51 | 22,9% | 0,140 | 0,146 | 0,161 |
| sub_N_D377Y | 5 | 1,2% | 5 |  |  |  | 1,7% | 0 | 0,22 | 0,01 | 4,03 | 0,0% | 0,309 | 0,153 | 0,327 |
| sub_ORF7b_E39 | 5 | 1,2% | 5 |  |  |  | 1,7% | 0 | 0,22 | 0,01 | 4,03 | 0,0% | 0,309 | 0,153 | 0,327 |
| sub_ORF1b_V767L | 99 | 24,1% | 65 |  |  |  | 22,2% | 34 | 1,42 | 0,88 | 2,31 | 28,8% | 0,150 | 0,155 | 0,162 |
| sub_ORF1b_A176S | 99 | 24,1% | 65 |  |  |  | 22,2% | 34 | 1,42 | 0,88 | 2,31 | 28,8% | 0,150 | 0,155 | 0,162 |
| sub_ORF1b_K1141R | 99 | 24,1% | 65 |  |  |  | 22,2% | 34 | 1,42 | 0,88 | 2,31 | 28,8% | 0,150 | 0,155 | 0,162 |
| sub_N_A376T | 96 | 23,4% | 63 |  |  |  | 21,5% | 33 | 1,42 | 0,87 | 2,31 | 28,0% | 0,156 | 0,161 | 0,197 |
| sub_ORF1a_A3623S | 8 | 1,9% | 4 |  |  |  | 1,4% | 4 | 2,53 | 0,67 | 9,51 | 3,4% | 0,170 | 0,179 | 0,234 |
| sub_ORF1b_E1184D | 100 | 24,3% | 66 |  |  |  | 22,5% | 34 | 1,40 | 0,86 | 2,26 | 28,8% | 0,173 | 0,179 | 0,204 |
| sub_S_D1118H | 192 | 46,7% | 143 |  |  |  | 48,8% | 49 | 0,75 | 0,49 | 1,15 | 41,5% | 0,184 | 0,181 | 0,191 |
| del_S_Y144m | 195 | 47,4% | 145 |  |  |  | 49,5% | 50 | 0,75 | 0,49 | 1,16 | 42,4% | 0,194 | 0,191 | 0,230 |
| sub_ORF3a_Q57H | 127 | 30,9% | 85 |  |  |  | 29,0% | 42 | 1,35 | 0,86 | 2,13 | 35,6% | 0,188 | 0,191 | 0,196 |
| sub_N_M234I | 94 | 22,9% | 62 |  |  |  | 21,2% | 32 | 1,39 | 0,85 | 2,27 | 27,1% | 0,187 | 0,193 | 0,197 |
| del_ORF1a_S3675m | 219 | 53,3% | 162 |  |  |  | 55,3% | 57 | 0,76 | 0,49 | 1,16 | 48,3% | 0,200 | 0,199 | 0,229 |
| del_ORF1a_G3676m | 219 | 53,3% | 162 |  |  |  | 55,3% | 57 | 0,76 | 0,49 | 1,16 | 48,3% | 0,200 | 0,199 | 0,229 |
| del_ORF1a_F3677m | 219 | 53,3% | 162 |  |  |  | 55,3% | 57 | 0,76 | 0,49 | 1,16 | 48,3% | 0,200 | 0,199 | 0,229 |
| sub_N_T362I | 4 | 1,0% | 4 |  |  |  | 1,4% | 0 | 0,27 | 0,01 | 5,08 | 0,0% | 0,383 | 0,202 | 0,582 |
| sub_S_T240I | 4 | 1,0% | 4 |  |  |  | 1,4% | 0 | 0,27 | 0,01 | 5,08 | 0,0% | 0,383 | 0,202 | 0,582 |
| sub_M_I82T | 4 | 1,0% | 4 |  |  |  | 1,4% | 0 | 0,27 | 0,01 | 5,08 | 0,0% | 0,383 | 0,202 | 0,582 |
| sub_ORF1a_A2097V | 11 | 2,7% | 6 |  |  |  | 2,0% | 5 | 2,14 | 0,67 | 6,81 | 4,2% | 0,196 | 0,213 | 0,308 |
| sub_ORF1b_P1000L | 14 | 3,4% | 8 |  |  |  | 2,7% | 6 | 1,94 | 0,68 | 5,51 | 5,1% | 0,213 | 0,234 | 0,240 |
| sub_ORF3a_G172V | 14 | 3,4% | 8 |  |  |  | 2,7% | 6 | 1,94 | 0,68 | 5,51 | 5,1% | 0,213 | 0,234 | 0,240 |
| sub_N_M1X | 85 | 20,7% | 65 |  |  |  | 22,2% | 20 | 0,73 | 0,42 | 1,26 | 16,9% | 0,253 | 0,236 | 0,282 |
| sub_ORF1a_T1001I | 193 | 47,0% | 143 |  |  |  | 48,8% | 50 | 0,77 | 0,50 | 1,19 | 42,4% | 0,240 | 0,237 | 0,275 |
| sub_S_T716I | 193 | 47,0% | 143 |  |  |  | 48,8% | 50 | 0,77 | 0,50 | 1,19 | 42,4% | 0,240 | 0,237 | 0,275 |
| del_S_H69m | 193 | 47,0% | 143 |  |  |  | 48,8% | 50 | 0,77 | 0,50 | 1,19 | 42,4% | 0,240 | 0,237 | 0,275 |
| del_S_V70m | 193 | 47,0% | 143 |  |  |  | 48,8% | 50 | 0,77 | 0,50 | 1,19 | 42,4% | 0,240 | 0,237 | 0,275 |
| sub_ORF1b_V2073I | 6 | 1,5% | 3 |  |  |  | 1,0% | 3 | 2,52 | 0,56 | 11,24 | 2,5% | 0,227 | 0,246 | 0,360 |
| sub_S_A570D | 192 | 46,7% | 142 |  |  |  | 48,5% | 50 | 0,78 | 0,51 | 1,20 | 42,4% | 0,266 | 0,263 | 0,276 |
| sub_N_A211V | 3 | 0,7% | 3 |  |  |  | 1,0% | 0 | 0,35 | 0,02 | 6,83 | 0,0% | 0,489 | 0,270 | 0,561 |
| sub_ORF1a_V2613F | 3 | 0,7% | 3 |  |  |  | 1,0% | 0 | 0,35 | 0,02 | 6,83 | 0,0% | 0,489 | 0,270 | 0,561 |
| sub_ORF3a_G100C | 3 | 0,7% | 3 |  |  |  | 1,0% | 0 | 0,35 | 0,02 | 6,83 | 0,0% | 0,489 | 0,270 | 0,561 |
| sub_ORF7a_P34L | 3 | 0,7% | 3 |  |  |  | 1,0% | 0 | 0,35 | 0,02 | 6,83 | 0,0% | 0,489 | 0,270 | 0,561 |
| sub_N_P142S | 3 | 0,7% | 3 |  |  |  | 1,0% | 0 | 0,35 | 0,02 | 6,83 | 0,0% | 0,489 | 0,270 | 0,561 |
| sub_ORF1a_I1398V | 3 | 0,7% | 3 |  |  |  | 1,0% | 0 | 0,35 | 0,02 | 6,83 | 0,0% | 0,489 | 0,270 | 0,561 |
| sub_ORF1a_A4016V | 3 | 0,7% | 3 |  |  |  | 1,0% | 0 | 0,35 | 0,02 | 6,83 | 0,0% | 0,489 | 0,270 | 0,561 |
| sub_ORF1b_R574G | 3 | 0,7% | 3 |  |  |  | 1,0% | 0 | 0,35 | 0,02 | 6,83 | 0,0% | 0,489 | 0,270 | 0,561 |
| sub_ORF1a_Y3722C | 3 | 0,7% | 3 |  |  |  | 1,0% | 0 | 0,35 | 0,02 | 6,83 | 0,0% | 0,489 | 0,270 | 0,561 |
| sub_ORF1b_E1264D | 3 | 0,7% | 3 |  |  |  | 1,0% | 0 | 0,35 | 0,02 | 6,83 | 0,0% | 0,489 | 0,270 | 0,561 |
| sub_ORF1b_T1274I | 3 | 0,7% | 3 |  |  |  | 1,0% | 0 | 0,35 | 0,02 | 6,83 | 0,0% | 0,489 | 0,270 | 0,561 |
| sub_ORF3a_D22Y | 3 | 0,7% | 3 |  |  |  | 1,0% | 0 | 0,35 | 0,02 | 6,83 | 0,0% | 0,489 | 0,270 | 0,561 |
| sub_ORF1a_S1612L | 3 | 0,7% | 3 |  |  |  | 1,0% | 0 | 0,35 | 0,02 | 6,83 | 0,0% | 0,489 | 0,270 | 0,561 |
| sub_ORF1a_E2993K | 3 | 0,7% | 3 |  |  |  | 1,0% | 0 | 0,35 | 0,02 | 6,83 | 0,0% | 0,489 | 0,270 | 0,561 |
| sub_S_P26S | 3 | 0,7% | 3 |  |  |  | 1,0% | 0 | 0,35 | 0,02 | 6,83 | 0,0% | 0,489 | 0,270 | 0,561 |
| sub_ORF1a_S1188L | 3 | 0,7% | 3 |  |  |  | 1,0% | 0 | 0,35 | 0,02 | 6,83 | 0,0% | 0,489 | 0,270 | 0,561 |
| sub_E_L21F | 3 | 0,7% | 3 |  |  |  | 1,0% | 0 | 0,35 | 0,02 | 6,83 | 0,0% | 0,489 | 0,270 | 0,561 |
| sub_N_S2Y | 3 | 0,7% | 3 |  |  |  | 1,0% | 0 | 0,35 | 0,02 | 6,83 | 0,0% | 0,489 | 0,270 | 0,561 |
| sub_N_A12G | 3 | 0,7% | 3 |  |  |  | 1,0% | 0 | 0,35 | 0,02 | 6,83 | 0,0% | 0,489 | 0,270 | 0,561 |
| sub_ORF1a_T2007I | 3 | 0,7% | 3 |  |  |  | 1,0% | 0 | 0,35 | 0,02 | 6,83 | 0,0% | 0,489 | 0,270 | 0,561 |
| sub_ORF1b_P314F | 3 | 0,7% | 3 |  |  |  | 1,0% | 0 | 0,35 | 0,02 | 6,83 | 0,0% | 0,489 | 0,270 | 0,561 |
| sub_ORF9b_H9D | 3 | 0,7% | 3 |  |  |  | 1,0% | 0 | 0,35 | 0,02 | 6,83 | 0,0% | 0,489 | 0,270 | 0,561 |
| sub_S_F888L | 3 | 0,7% | 3 |  |  |  | 1,0% | 0 | 0,35 | 0,02 | 6,83 | 0,0% | 0,489 | 0,270 | 0,561 |
| sub_ORF1a_P971L | 13 | 3,2% | 11 |  |  |  | 3,8% | 2 | 0,53 | 0,13 | 2,11 | 1,7% | 0,365 | 0,280 | 0,364 |
| sub_S_S982A | 191 | 46,5% | 141 |  |  |  | 48,1% | 50 | 0,79 | 0,52 | 1,22 | 42,4% | 0,294 | 0,290 | 0,326 |
| sub_S_P681R | 9 | 2,2% | 5 |  |  |  | 1,7% | 4 | 2,06 | 0,58 | 7,30 | 3,4% | 0,262 | 0,291 | 0,285 |
| sub_ORF1a_Q3966R | 9 | 2,2% | 5 |  |  |  | 1,7% | 4 | 2,06 | 0,58 | 7,30 | 3,4% | 0,262 | 0,291 | 0,285 |
| sub_ORF3a_W131C | 45 | 10,9% | 35 |  |  |  | 11,9% | 10 | 0,70 | 0,34 | 1,45 | 8,5% | 0,343 | 0,308 | 0,384 |
| sub_ORF1a_I2230T | 190 | 46,2% | 140 |  |  |  | 47,8% | 50 | 0,81 | 0,52 | 1,24 | 42,4% | 0,324 | 0,320 | 0,328 |
| sub_S_P681H | 190 | 46,2% | 140 |  |  |  | 47,8% | 50 | 0,81 | 0,52 | 1,24 | 42,4% | 0,324 | 0,320 | 0,328 |
| sub_ORF1a_P286L | 4 | 1,0% | 2 |  |  |  | 0,7% | 2 | 2,50 | 0,43 | 14,63 | 1,7% | 0,309 | 0,344 | 0,325 |
| sub_ORF1a_N3651S | 4 | 1,0% | 2 |  |  |  | 0,7% | 2 | 2,50 | 0,43 | 14,63 | 1,7% | 0,309 | 0,344 | 0,325 |
| sub_ORF3a_V50A | 4 | 1,0% | 2 |  |  |  | 0,7% | 2 | 2,50 | 0,43 | 14,63 | 1,7% | 0,309 | 0,344 | 0,325 |
| sub_ORF3a_M260X | 4 | 1,0% | 2 |  |  |  | 0,7% | 2 | 2,50 | 0,43 | 14,63 | 1,7% | 0,309 | 0,344 | 0,325 |
| sub_S_A653V | 4 | 1,0% | 2 |  |  |  | 0,7% | 2 | 2,50 | 0,43 | 14,63 | 1,7% | 0,309 | 0,344 | 0,325 |
| sub_S_G1219V | 4 | 1,0% | 2 |  |  |  | 0,7% | 2 | 2,50 | 0,43 | 14,63 | 1,7% | 0,309 | 0,344 | 0,325 |
| del_ORF3a_P258m | 4 | 1,0% | 2 |  |  |  | 0,7% | 2 | 2,50 | 0,43 | 14,63 | 1,7% | 0,309 | 0,344 | 0,325 |
| del_ORF3a_V259m | 4 | 1,0% | 2 |  |  |  | 0,7% | 2 | 2,50 | 0,43 | 14,63 | 1,7% | 0,309 | 0,344 | 0,325 |
| del_ORF8_D119m | 4 | 1,0% | 2 |  |  |  | 0,7% | 2 | 2,50 | 0,43 | 14,63 | 1,7% | 0,309 | 0,344 | 0,325 |
| del_ORF8_F120m | 4 | 1,0% | 2 |  |  |  | 0,7% | 2 | 2,50 | 0,43 | 14,63 | 1,7% | 0,309 | 0,344 | 0,325 |
| sub_S_Q675H | 4 | 1,0% | 2 |  |  |  | 0,7% | 2 | 2,50 | 0,43 | 14,63 | 1,7% | 0,309 | 0,344 | 0,325 |
| sub_ORF1b_K2557R | 4 | 1,0% | 2 |  |  |  | 0,7% | 2 | 2,50 | 0,43 | 14,63 | 1,7% | 0,309 | 0,344 | 0,325 |
| sub_ORF1b_D144E | 12 | 2,9% | 10 |  |  |  | 3,4% | 2 | 0,58 | 0,14 | 2,34 | 1,7% | 0,444 | 0,349 | 0,522 |
| sub_S_V1264L | 12 | 2,9% | 10 |  |  |  | 3,4% | 2 | 0,58 | 0,14 | 2,34 | 1,7% | 0,444 | 0,349 | 0,522 |
| sub_ORF8_Q27 | 196 | 47,7% | 144 |  |  |  | 49,1% | 52 | 0,82 | 0,53 | 1,25 | 44,1% | 0,354 | 0,351 | 0,383 |
| sub_ORF1a_A1708D | 196 | 47,7% | 144 |  |  |  | 49,1% | 52 | 0,82 | 0,53 | 1,25 | 44,1% | 0,354 | 0,351 | 0,383 |
| sub_M_H148Q | 2 | 0,5% | 2 |  |  |  | 0,7% | 0 | 0,49 | 0,02 | 10,32 | 0,0% | 0,648 | 0,368 | 1,000 |
| sub_N_M210I | 2 | 0,5% | 2 |  |  |  | 0,7% | 0 | 0,49 | 0,02 | 10,32 | 0,0% | 0,648 | 0,368 | 1,000 |
| sub_ORF1a_K513R | 2 | 0,5% | 2 |  |  |  | 0,7% | 0 | 0,49 | 0,02 | 10,32 | 0,0% | 0,648 | 0,368 | 1,000 |
| sub_ORF1a_P892Q | 2 | 0,5% | 2 |  |  |  | 0,7% | 0 | 0,49 | 0,02 | 10,32 | 0,0% | 0,648 | 0,368 | 1,000 |
| sub_ORF1a_V2779L | 2 | 0,5% | 2 |  |  |  | 0,7% | 0 | 0,49 | 0,02 | 10,32 | 0,0% | 0,648 | 0,368 | 1,000 |
| sub_ORF1b_V1538L | 2 | 0,5% | 2 |  |  |  | 0,7% | 0 | 0,49 | 0,02 | 10,32 | 0,0% | 0,648 | 0,368 | 1,000 |
| sub_ORF1a_L3199K | 2 | 0,5% | 2 |  |  |  | 0,7% | 0 | 0,49 | 0,02 | 10,32 | 0,0% | 0,648 | 0,368 | 1,000 |
| sub_E_S68F | 2 | 0,5% | 2 |  |  |  | 0,7% | 0 | 0,49 | 0,02 | 10,32 | 0,0% | 0,648 | 0,368 | 1,000 |
| sub_S_R78S | 2 | 0,5% | 2 |  |  |  | 0,7% | 0 | 0,49 | 0,02 | 10,32 | 0,0% | 0,648 | 0,368 | 1,000 |
| sub_ORF7a_A105V | 2 | 0,5% | 2 |  |  |  | 0,7% | 0 | 0,49 | 0,02 | 10,32 | 0,0% | 0,648 | 0,368 | 1,000 |
| sub_ORF7a_T28I | 2 | 0,5% | 2 |  |  |  | 0,7% | 0 | 0,49 | 0,02 | 10,32 | 0,0% | 0,648 | 0,368 | 1,000 |
| del_S_Q14m | 2 | 0,5% | 2 |  |  |  | 0,7% | 0 | 0,49 | 0,02 | 10,32 | 0,0% | 0,648 | 0,368 | 1,000 |
| del_S_C15m | 2 | 0,5% | 2 |  |  |  | 0,7% | 0 | 0,49 | 0,02 | 10,32 | 0,0% | 0,648 | 0,368 | 1,000 |
| del_S_V16m | 2 | 0,5% | 2 |  |  |  | 0,7% | 0 | 0,49 | 0,02 | 10,32 | 0,0% | 0,648 | 0,368 | 1,000 |
| sub_ORF1a_D203N | 2 | 0,5% | 2 |  |  |  | 0,7% | 0 | 0,49 | 0,02 | 10,32 | 0,0% | 0,648 | 0,368 | 1,000 |
| sub_ORF1a_T2106I | 2 | 0,5% | 2 |  |  |  | 0,7% | 0 | 0,49 | 0,02 | 10,32 | 0,0% | 0,648 | 0,368 | 1,000 |
| sub_M_I76V | 2 | 0,5% | 2 |  |  |  | 0,7% | 0 | 0,49 | 0,02 | 10,32 | 0,0% | 0,648 | 0,368 | 1,000 |
| sub_ORF1b_D2333G | 2 | 0,5% | 2 |  |  |  | 0,7% | 0 | 0,49 | 0,02 | 10,32 | 0,0% | 0,648 | 0,368 | 1,000 |
| sub_ORF1b_A517V | 2 | 0,5% | 2 |  |  |  | 0,7% | 0 | 0,49 | 0,02 | 10,32 | 0,0% | 0,648 | 0,368 | 1,000 |
| sub_M_S136N | 2 | 0,5% | 2 |  |  |  | 0,7% | 0 | 0,49 | 0,02 | 10,32 | 0,0% | 0,648 | 0,368 | 1,000 |
| sub_ORF1a_T2174I | 2 | 0,5% | 2 |  |  |  | 0,7% | 0 | 0,49 | 0,02 | 10,32 | 0,0% | 0,648 | 0,368 | 1,000 |
| sub_ORF8_G8V | 2 | 0,5% | 2 |  |  |  | 0,7% | 0 | 0,49 | 0,02 | 10,32 | 0,0% | 0,648 | 0,368 | 1,000 |
| sub_ORF1a_P1803S | 2 | 0,5% | 2 |  |  |  | 0,7% | 0 | 0,49 | 0,02 | 10,32 | 0,0% | 0,648 | 0,368 | 1,000 |
| sub_S_H49Y | 2 | 0,5% | 2 |  |  |  | 0,7% | 0 | 0,49 | 0,02 | 10,32 | 0,0% | 0,648 | 0,368 | 1,000 |
| sub_M_S173 | 2 | 0,5% | 2 |  |  |  | 0,7% | 0 | 0,49 | 0,02 | 10,32 | 0,0% | 0,648 | 0,368 | 1,000 |
| sub_N_D3E | 2 | 0,5% | 2 |  |  |  | 0,7% | 0 | 0,49 | 0,02 | 10,32 | 0,0% | 0,648 | 0,368 | 1,000 |
| sub_ORF3a_E19V | 2 | 0,5% | 2 |  |  |  | 0,7% | 0 | 0,49 | 0,02 | 10,32 | 0,0% | 0,648 | 0,368 | 1,000 |
| sub_S_Q414K | 2 | 0,5% | 2 |  |  |  | 0,7% | 0 | 0,49 | 0,02 | 10,32 | 0,0% | 0,648 | 0,368 | 1,000 |
| del_ORF3a_I20m | 2 | 0,5% | 2 |  |  |  | 0,7% | 0 | 0,49 | 0,02 | 10,32 | 0,0% | 0,648 | 0,368 | 1,000 |
| del_ORF3a_K21m | 2 | 0,5% | 2 |  |  |  | 0,7% | 0 | 0,49 | 0,02 | 10,32 | 0,0% | 0,648 | 0,368 | 1,000 |
| del_ORF3a_D22m | 2 | 0,5% | 2 |  |  |  | 0,7% | 0 | 0,49 | 0,02 | 10,32 | 0,0% | 0,648 | 0,368 | 1,000 |
| del_ORF3a_A23m | 2 | 0,5% | 2 |  |  |  | 0,7% | 0 | 0,49 | 0,02 | 10,32 | 0,0% | 0,648 | 0,368 | 1,000 |
| del_ORF3a_T24m | 2 | 0,5% | 2 |  |  |  | 0,7% | 0 | 0,49 | 0,02 | 10,32 | 0,0% | 0,648 | 0,368 | 1,000 |
| del_ORF3a_P25m | 2 | 0,5% | 2 |  |  |  | 0,7% | 0 | 0,49 | 0,02 | 10,32 | 0,0% | 0,648 | 0,368 | 1,000 |
| del_ORF3a_S26m | 2 | 0,5% | 2 |  |  |  | 0,7% | 0 | 0,49 | 0,02 | 10,32 | 0,0% | 0,648 | 0,368 | 1,000 |
| del_ORF3a_D27m | 2 | 0,5% | 2 |  |  |  | 0,7% | 0 | 0,49 | 0,02 | 10,32 | 0,0% | 0,648 | 0,368 | 1,000 |
| del_ORF3a_F28m | 2 | 0,5% | 2 |  |  |  | 0,7% | 0 | 0,49 | 0,02 | 10,32 | 0,0% | 0,648 | 0,368 | 1,000 |
| del_ORF3a_V29m | 2 | 0,5% | 2 |  |  |  | 0,7% | 0 | 0,49 | 0,02 | 10,32 | 0,0% | 0,648 | 0,368 | 1,000 |
| ins__22204__ACAGATCGA | | 2 | 0,5% | 2 |  |  |  | 0,7% | 0 | 0,49 | 0,02 | 10,32 | 0,0% | 0,648 | 0,368 | 1,000 |
| sub_S_M1237I | 2 | 0,5% | 2 |  |  |  | 0,7% | 0 | 0,49 | 0,02 | 10,32 | 0,0% | 0,648 | 0,368 | 1,000 |  |
| sub_ORF1a_Q3729R | 2 | 0,5% | 2 |  |  |  | 0,7% | 0 | 0,49 | 0,02 | 10,32 | 0,0% | 0,648 | 0,368 | 1,000 |  |
| sub_ORF3a_W149C | 2 | 0,5% | 2 |  |  |  | 0,7% | 0 | 0,49 | 0,02 | 10,32 | 0,0% | 0,648 | 0,368 | 1,000 |  |
| sub_ORF1a_T3255I | 2 | 0,5% | 2 |  |  |  | 0,7% | 0 | 0,49 | 0,02 | 10,32 | 0,0% | 0,648 | 0,368 | 1,000 |  |
| sub_ORF1a_I3618V | 2 | 0,5% | 2 |  |  |  | 0,7% | 0 | 0,49 | 0,02 | 10,32 | 0,0% | 0,648 | 0,368 | 1,000 |  |
| sub_S_T478K | 2 | 0,5% | 2 |  |  |  | 0,7% | 0 | 0,49 | 0,02 | 10,32 | 0,0% | 0,648 | 0,368 | 1,000 |  |
| sub_S_T732A | 2 | 0,5% | 2 |  |  |  | 0,7% | 0 | 0,49 | 0,02 | 10,32 | 0,0% | 0,648 | 0,368 | 1,000 |  |
| sub_ORF1b_T132I | 2 | 0,5% | 2 |  |  |  | 0,7% | 0 | 0,49 | 0,02 | 10,32 | 0,0% | 0,648 | 0,368 | 1,000 |  |
| sub_ORF1a_P3504S | 2 | 0,5% | 2 |  |  |  | 0,7% | 0 | 0,49 | 0,02 | 10,32 | 0,0% | 0,648 | 0,368 | 1,000 |  |
| sub_ORF1a_H110Y | 2 | 0,5% | 2 |  |  |  | 0,7% | 0 | 0,49 | 0,02 | 10,32 | 0,0% | 0,648 | 0,368 | 1,000 |  |
| sub_ORF1a_I2709V | 2 | 0,5% | 2 |  |  |  | 0,7% | 0 | 0,49 | 0,02 | 10,32 | 0,0% | 0,648 | 0,368 | 1,000 |  |
| sub_ORF1a_V1291F | 2 | 0,5% | 2 |  |  |  | 0,7% | 0 | 0,49 | 0,02 | 10,32 | 0,0% | 0,648 | 0,368 | 1,000 |  |
| sub_ORF1b_E1871G | 2 | 0,5% | 2 |  |  |  | 0,7% | 0 | 0,49 | 0,02 | 10,32 | 0,0% | 0,648 | 0,368 | 1,000 |  |
| sub_ORF1a_T882I | 2 | 0,5% | 2 |  |  |  | 0,7% | 0 | 0,49 | 0,02 | 10,32 | 0,0% | 0,648 | 0,368 | 1,000 |  |
| sub_ORF1a_K1343R | 2 | 0,5% | 2 |  |  |  | 0,7% | 0 | 0,49 | 0,02 | 10,32 | 0,0% | 0,648 | 0,368 | 1,000 |  |
| sub_ORF1a_A819V | 2 | 0,5% | 2 |  |  |  | 0,7% | 0 | 0,49 | 0,02 | 10,32 | 0,0% | 0,648 | 0,368 | 1,000 |  |
| sub_ORF1a_V2071I | 2 | 0,5% | 2 |  |  |  | 0,7% | 0 | 0,49 | 0,02 | 10,32 | 0,0% | 0,648 | 0,368 | 1,000 |  |
| sub_ORF1a_S1494F | 2 | 0,5% | 2 |  |  |  | 0,7% | 0 | 0,49 | 0,02 | 10,32 | 0,0% | 0,648 | 0,368 | 1,000 |  |
| sub_ORF1a_I1259L | 2 | 0,5% | 2 |  |  |  | 0,7% | 0 | 0,49 | 0,02 | 10,32 | 0,0% | 0,648 | 0,368 | 1,000 |  |
| sub_N_P80R | 2 | 0,5% | 2 |  |  |  | 0,7% | 0 | 0,49 | 0,02 | 10,32 | 0,0% | 0,648 | 0,368 | 1,000 |  |
| sub_N_D348H | 2 | 0,5% | 2 |  |  |  | 0,7% | 0 | 0,49 | 0,02 | 10,32 | 0,0% | 0,648 | 0,368 | 1,000 |  |
| sub_ORF1a_K1795Q | 2 | 0,5% | 2 |  |  |  | 0,7% | 0 | 0,49 | 0,02 | 10,32 | 0,0% | 0,648 | 0,368 | 1,000 |  |
| sub_ORF3a_S253P | 2 | 0,5% | 2 |  |  |  | 0,7% | 0 | 0,49 | 0,02 | 10,32 | 0,0% | 0,648 | 0,368 | 1,000 |  |
| sub_ORF8_E92K | 2 | 0,5% | 2 |  |  |  | 0,7% | 0 | 0,49 | 0,02 | 10,32 | 0,0% | 0,648 | 0,368 | 1,000 |  |
| sub_ORF9b_Q77E | 2 | 0,5% | 2 |  |  |  | 0,7% | 0 | 0,49 | 0,02 | 10,32 | 0,0% | 0,648 | 0,368 | 1,000 |  |
| sub_S_T20N | 2 | 0,5% | 2 |  |  |  | 0,7% | 0 | 0,49 | 0,02 | 10,32 | 0,0% | 0,648 | 0,368 | 1,000 |  |
| sub_S_K417T | 2 | 0,5% | 2 |  |  |  | 0,7% | 0 | 0,49 | 0,02 | 10,32 | 0,0% | 0,648 | 0,368 | 1,000 |  |
| sub_S_T1027I | 2 | 0,5% | 2 |  |  |  | 0,7% | 0 | 0,49 | 0,02 | 10,32 | 0,0% | 0,648 | 0,368 | 1,000 |  |
| sub_S_V1176F | 2 | 0,5% | 2 |  |  |  | 0,7% | 0 | 0,49 | 0,02 | 10,32 | 0,0% | 0,648 | 0,368 | 1,000 |  |
| ins__28269__AAAC | 2 | 0,5% | 2 |  |  |  | 0,7% | 0 | 0,49 | 0,02 | 10,32 | 0,0% | 0,648 | 0,368 | 1,000 |  |
| sub_N_D3N | 2 | 0,5% | 2 |  |  |  | 0,7% | 0 | 0,49 | 0,02 | 10,32 | 0,0% | 0,648 | 0,368 | 1,000 |  |
| sub_ORF1a_G379E | 2 | 0,5% | 2 |  |  |  | 0,7% | 0 | 0,49 | 0,02 | 10,32 | 0,0% | 0,648 | 0,368 | 1,000 |  |
| sub_ORF6_F2M | 2 | 0,5% | 2 |  |  |  | 0,7% | 0 | 0,49 | 0,02 | 10,32 | 0,0% | 0,648 | 0,368 | 1,000 |  |
| sub_S_Q52R | 2 | 0,5% | 2 |  |  |  | 0,7% | 0 | 0,49 | 0,02 | 10,32 | 0,0% | 0,648 | 0,368 | 1,000 |  |
| sub_S_A67V | 2 | 0,5% | 2 |  |  |  | 0,7% | 0 | 0,49 | 0,02 | 10,32 | 0,0% | 0,648 | 0,368 | 1,000 |  |
| sub_S_H69L | 2 | 0,5% | 2 |  |  |  | 0,7% | 0 | 0,49 | 0,02 | 10,32 | 0,0% | 0,648 | 0,368 | 1,000 |  |
| sub_S_V70I | 16 | 3,9% | 13 |  |  |  | 4,4% | 3 | 0,63 | 0,19 | 2,08 | 2,5% | 0,448 | 0,369 | 0,573 |  |
| sub_N_D3L | 81 | 19,7% | 61 |  |  |  | 20,8% | 20 | 0,79 | 0,45 | 1,37 | 16,9% | 0,395 | 0,372 | 0,413 |  |
| sub_ORF1a_T1881I | 7 | 1,7% | 6 |  |  |  | 2,0% | 1 | 0,56 | 0,09 | 3,38 | 0,8% | 0,531 | 0,395 | 0,679 |  |
| sub_ORF8_L84S | 7 | 1,7% | 4 |  |  |  | 1,4% | 3 | 1,95 | 0,47 | 8,01 | 2,5% | 0,355 | 0,404 | 0,415 |  |
| sub_ORF3a_G224C | 7 | 1,7% | 4 |  |  |  | 1,4% | 3 | 1,95 | 0,47 | 8,01 | 2,5% | 0,355 | 0,404 | 0,415 |  |
| sub_ORF1a_L3829F | 7 | 1,7% | 4 |  |  |  | 1,4% | 3 | 1,95 | 0,47 | 8,01 | 2,5% | 0,355 | 0,404 | 0,415 |  |
| sub_ORF1a_K1247N | 7 | 1,7% | 4 |  |  |  | 1,4% | 3 | 1,95 | 0,47 | 8,01 | 2,5% | 0,355 | 0,404 | 0,415 |  |
| sub_ORF8_W45L | 10 | 2,4% | 6 |  |  |  | 2,0% | 4 | 1,74 | 0,51 | 5,90 | 3,4% | 0,375 | 0,424 | 0,482 |  |
| sub_ORF1a_M2259I | 13 | 3,2% | 8 |  |  |  | 2,7% | 5 | 1,63 | 0,54 | 4,86 | 4,2% | 0,383 | 0,430 | 0,533 |  |
| sub_S_H69S | 11 | 2,7% | 9 |  |  |  | 3,1% | 2 | 0,64 | 0,16 | 2,63 | 1,7% | 0,539 | 0,434 | 0,736 |  |
| sub_ORF1a_F3677L | 15 | 3,6% | 12 |  |  |  | 4,1% | 3 | 0,68 | 0,20 | 2,28 | 2,5% | 0,534 | 0,447 | 0,570 |  |
| sub_S_Y144V | 15 | 3,6% | 12 |  |  |  | 4,1% | 3 | 0,68 | 0,20 | 2,28 | 2,5% | 0,534 | 0,447 | 0,570 |  |
| sub_N_S235F | 189 | 46,0% | 138 |  |  |  | 47,1% | 51 | 0,86 | 0,56 | 1,32 | 43,2% | 0,479 | 0,475 | 0,512 |  |
| sub_ORF1a_A903V | 2 | 0,5% | 1 |  |  |  | 0,3% | 1 | 2,49 | 0,26 | 24,17 | 0,8% | 0,432 | 0,505 | 0,492 |  |
| sub_N_Q70R | 2 | 0,5% | 1 |  |  |  | 0,3% | 1 | 2,49 | 0,26 | 24,17 | 0,8% | 0,432 | 0,505 | 0,492 |  |
| sub_ORF1a_L2349 | 2 | 0,5% | 1 |  |  |  | 0,3% | 1 | 2,49 | 0,26 | 24,17 | 0,8% | 0,432 | 0,505 | 0,492 |  |
| sub_ORF3a_T14I | 2 | 0,5% | 1 |  |  |  | 0,3% | 1 | 2,49 | 0,26 | 24,17 | 0,8% | 0,432 | 0,505 | 0,492 |  |
| sub_ORF9b_K67E | 2 | 0,5% | 1 |  |  |  | 0,3% | 1 | 2,49 | 0,26 | 24,17 | 0,8% | 0,432 | 0,505 | 0,492 |  |
| sub_S_P330S | 2 | 0,5% | 1 |  |  |  | 0,3% | 1 | 2,49 | 0,26 | 24,17 | 0,8% | 0,432 | 0,505 | 0,492 |  |
| sub_S_V1094I | 2 | 0,5% | 1 |  |  |  | 0,3% | 1 | 2,49 | 0,26 | 24,17 | 0,8% | 0,432 | 0,505 | 0,492 |  |
| sub_E_V58F | 2 | 0,5% | 1 |  |  |  | 0,3% | 1 | 2,49 | 0,26 | 24,17 | 0,8% | 0,432 | 0,505 | 0,492 |  |
| sub_ORF1a_H3076Y | 2 | 0,5% | 1 |  |  |  | 0,3% | 1 | 2,49 | 0,26 | 24,17 | 0,8% | 0,432 | 0,505 | 0,492 |  |
| sub_N_A398V | 2 | 0,5% | 1 |  |  |  | 0,3% | 1 | 2,49 | 0,26 | 24,17 | 0,8% | 0,432 | 0,505 | 0,492 |  |
| sub_N_E136D | 2 | 0,5% | 1 |  |  |  | 0,3% | 1 | 2,49 | 0,26 | 24,17 | 0,8% | 0,432 | 0,505 | 0,492 |  |
| sub_ORF1a_L3201I | 2 | 0,5% | 1 |  |  |  | 0,3% | 1 | 2,49 | 0,26 | 24,17 | 0,8% | 0,432 | 0,505 | 0,492 |  |
| sub_ORF1a_M2674I | 2 | 0,5% | 1 |  |  |  | 0,3% | 1 | 2,49 | 0,26 | 24,17 | 0,8% | 0,432 | 0,505 | 0,492 |  |
| sub_ORF8_T87I | 2 | 0,5% | 1 |  |  |  | 0,3% | 1 | 2,49 | 0,26 | 24,17 | 0,8% | 0,432 | 0,505 | 0,492 |  |
| sub_M_S173K | 2 | 0,5% | 1 |  |  |  | 0,3% | 1 | 2,49 | 0,26 | 24,17 | 0,8% | 0,432 | 0,505 | 0,492 |  |
| sub_ORF3a_V112F | 2 | 0,5% | 1 |  |  |  | 0,3% | 1 | 2,49 | 0,26 | 24,17 | 0,8% | 0,432 | 0,505 | 0,492 |  |
| sub_N_T271I | 2 | 0,5% | 1 |  |  |  | 0,3% | 1 | 2,49 | 0,26 | 24,17 | 0,8% | 0,432 | 0,505 | 0,492 |  |
| sub_ORF3a_T24I | 2 | 0,5% | 1 |  |  |  | 0,3% | 1 | 2,49 | 0,26 | 24,17 | 0,8% | 0,432 | 0,505 | 0,492 |  |
| sub_ORF1a_I880V | 2 | 0,5% | 1 |  |  |  | 0,3% | 1 | 2,49 | 0,26 | 24,17 | 0,8% | 0,432 | 0,505 | 0,492 |  |
| sub_S_T1117I | 2 | 0,5% | 1 |  |  |  | 0,3% | 1 | 2,49 | 0,26 | 24,17 | 0,8% | 0,432 | 0,505 | 0,492 |  |
| sub_S_H1083Y | 2 | 0,5% | 1 |  |  |  | 0,3% | 1 | 2,49 | 0,26 | 24,17 | 0,8% | 0,432 | 0,505 | 0,492 |  |
| sub_ORF1a_T4164A | 2 | 0,5% | 1 |  |  |  | 0,3% | 1 | 2,49 | 0,26 | 24,17 | 0,8% | 0,432 | 0,505 | 0,492 |  |
| sub_S_D1084Y | 2 | 0,5% | 1 |  |  |  | 0,3% | 1 | 2,49 | 0,26 | 24,17 | 0,8% | 0,432 | 0,505 | 0,492 |  |
| sub_S_T33P | 2 | 0,5% | 1 |  |  |  | 0,3% | 1 | 2,49 | 0,26 | 24,17 | 0,8% | 0,432 | 0,505 | 0,492 |  |
| sub_ORF1a_E1013K | 2 | 0,5% | 1 |  |  |  | 0,3% | 1 | 2,49 | 0,26 | 24,17 | 0,8% | 0,432 | 0,505 | 0,492 |  |
| sub_ORF1a_V2776F | 2 | 0,5% | 1 |  |  |  | 0,3% | 1 | 2,49 | 0,26 | 24,17 | 0,8% | 0,432 | 0,505 | 0,492 |  |
| sub_S_G769V | 2 | 0,5% | 1 |  |  |  | 0,3% | 1 | 2,49 | 0,26 | 24,17 | 0,8% | 0,432 | 0,505 | 0,492 |  |
| sub_ORF1b_D2576G | 2 | 0,5% | 1 |  |  |  | 0,3% | 1 | 2,49 | 0,26 | 24,17 | 0,8% | 0,432 | 0,505 | 0,492 |  |
| sub_ORF1b_M2667I | 2 | 0,5% | 1 |  |  |  | 0,3% | 1 | 2,49 | 0,26 | 24,17 | 0,8% | 0,432 | 0,505 | 0,492 |  |
| sub_ORF1a_E1205D | 2 | 0,5% | 1 |  |  |  | 0,3% | 1 | 2,49 | 0,26 | 24,17 | 0,8% | 0,432 | 0,505 | 0,492 |  |
| sub_S_V171L | 2 | 0,5% | 1 |  |  |  | 0,3% | 1 | 2,49 | 0,26 | 24,17 | 0,8% | 0,432 | 0,505 | 0,492 |  |
| sub_ORF1a_M3221I | 2 | 0,5% | 1 |  |  |  | 0,3% | 1 | 2,49 | 0,26 | 24,17 | 0,8% | 0,432 | 0,505 | 0,492 |  |
| sub_ORF1a_A555V | 2 | 0,5% | 1 |  |  |  | 0,3% | 1 | 2,49 | 0,26 | 24,17 | 0,8% | 0,432 | 0,505 | 0,492 |  |
| sub_ORF1b_M592K | 2 | 0,5% | 1 |  |  |  | 0,3% | 1 | 2,49 | 0,26 | 24,17 | 0,8% | 0,432 | 0,505 | 0,492 |  |
| sub_ORF1b_K594Q | 2 | 0,5% | 1 |  |  |  | 0,3% | 1 | 2,49 | 0,26 | 24,17 | 0,8% | 0,432 | 0,505 | 0,492 |  |
| sub_ORF1b_V2120L | 2 | 0,5% | 1 |  |  |  | 0,3% | 1 | 2,49 | 0,26 | 24,17 | 0,8% | 0,432 | 0,505 | 0,492 |  |
| sub_ORF7b_L4F | 2 | 0,5% | 1 |  |  |  | 0,3% | 1 | 2,49 | 0,26 | 24,17 | 0,8% | 0,432 | 0,505 | 0,492 |  |
| sub_S_R190S | 6 | 1,5% | 5 |  |  |  | 1,7% | 1 | 0,67 | 0,11 | 4,12 | 0,8% | 0,666 | 0,511 | 0,678 |  |
| sub_N_Q28R | 6 | 1,5% | 5 |  |  |  | 1,7% | 1 | 0,67 | 0,11 | 4,12 | 0,8% | 0,666 | 0,511 | 0,678 |  |
| sub_ORF9b_R25G | 6 | 1,5% | 5 |  |  |  | 1,7% | 1 | 0,67 | 0,11 | 4,12 | 0,8% | 0,666 | 0,511 | 0,678 |  |
| sub_ORF1a_T265I | 22 | 5,4% | 17 |  |  |  | 5,8% | 5 | 0,77 | 0,29 | 2,05 | 4,2% | 0,594 | 0,524 | 0,633 |  |
| sub_ORF1a_T592I | 1 | 0,2% | 1 |  |  |  | 0,3% | 0 | 0,82 | 0,03 | 20,34 | 0,0% | 0,905 | 0,525 | 1,000 |  |
| sub_ORF1b_R1729C | 1 | 0,2% | 1 |  |  |  | 0,3% | 0 | 0,82 | 0,03 | 20,34 | 0,0% | 0,905 | 0,525 | 1,000 |  |
| sub_ORF1a_K2849N | 1 | 0,2% | 1 |  |  |  | 0,3% | 0 | 0,82 | 0,03 | 20,34 | 0,0% | 0,905 | 0,525 | 1,000 |  |
| sub_ORF1b_V2216F | 1 | 0,2% | 1 |  |  |  | 0,3% | 0 | 0,82 | 0,03 | 20,34 | 0,0% | 0,905 | 0,525 | 1,000 |  |
| sub_S_D215H | 1 | 0,2% | 1 |  |  |  | 0,3% | 0 | 0,82 | 0,03 | 20,34 | 0,0% | 0,905 | 0,525 | 1,000 |  |
| sub_S_G798D | 1 | 0,2% | 1 |  |  |  | 0,3% | 0 | 0,82 | 0,03 | 20,34 | 0,0% | 0,905 | 0,525 | 1,000 |  |
| sub_M_R131N | 1 | 0,2% | 1 |  |  |  | 0,3% | 0 | 0,82 | 0,03 | 20,34 | 0,0% | 0,905 | 0,525 | 1,000 |  |
| sub_ORF1b_R1430S | 1 | 0,2% | 1 |  |  |  | 0,3% | 0 | 0,82 | 0,03 | 20,34 | 0,0% | 0,905 | 0,525 | 1,000 |  |
| sub_ORF1b_K1431 | 1 | 0,2% | 1 |  |  |  | 0,3% | 0 | 0,82 | 0,03 | 20,34 | 0,0% | 0,905 | 0,525 | 1,000 |  |
| sub_S_L841P | 1 | 0,2% | 1 |  |  |  | 0,3% | 0 | 0,82 | 0,03 | 20,34 | 0,0% | 0,905 | 0,525 | 1,000 |  |
| sub_ORF1a_A3497V | 1 | 0,2% | 1 |  |  |  | 0,3% | 0 | 0,82 | 0,03 | 20,34 | 0,0% | 0,905 | 0,525 | 1,000 |  |
| sub_ORF1b_T2099I | 1 | 0,2% | 1 |  |  |  | 0,3% | 0 | 0,82 | 0,03 | 20,34 | 0,0% | 0,905 | 0,525 | 1,000 |  |
| sub_ORF1a_V3467A | 1 | 0,2% | 1 |  |  |  | 0,3% | 0 | 0,82 | 0,03 | 20,34 | 0,0% | 0,905 | 0,525 | 1,000 |  |
| sub_S_L841R | 1 | 0,2% | 1 |  |  |  | 0,3% | 0 | 0,82 | 0,03 | 20,34 | 0,0% | 0,905 | 0,525 | 1,000 |  |
| sub_N_P207L | 1 | 0,2% | 1 |  |  |  | 0,3% | 0 | 0,82 | 0,03 | 20,34 | 0,0% | 0,905 | 0,525 | 1,000 |  |
| sub_ORF1a_R124C | 1 | 0,2% | 1 |  |  |  | 0,3% | 0 | 0,82 | 0,03 | 20,34 | 0,0% | 0,905 | 0,525 | 1,000 |  |
| sub_ORF1a_L2105F | 1 | 0,2% | 1 |  |  |  | 0,3% | 0 | 0,82 | 0,03 | 20,34 | 0,0% | 0,905 | 0,525 | 1,000 |  |
| sub_ORF1a_V2580F | 1 | 0,2% | 1 |  |  |  | 0,3% | 0 | 0,82 | 0,03 | 20,34 | 0,0% | 0,905 | 0,525 | 1,000 |  |
| sub_ORF1a_A3456T | 1 | 0,2% | 1 |  |  |  | 0,3% | 0 | 0,82 | 0,03 | 20,34 | 0,0% | 0,905 | 0,525 | 1,000 |  |
| sub_ORF1b_M809I | 1 | 0,2% | 1 |  |  |  | 0,3% | 0 | 0,82 | 0,03 | 20,34 | 0,0% | 0,905 | 0,525 | 1,000 |  |
| sub_ORF1a_G519D | 1 | 0,2% | 1 |  |  |  | 0,3% | 0 | 0,82 | 0,03 | 20,34 | 0,0% | 0,905 | 0,525 | 1,000 |  |
| sub_ORF1a_G2091C | 1 | 0,2% | 1 |  |  |  | 0,3% | 0 | 0,82 | 0,03 | 20,34 | 0,0% | 0,905 | 0,525 | 1,000 |  |
| sub_ORF1a_A4285V | 1 | 0,2% | 1 |  |  |  | 0,3% | 0 | 0,82 | 0,03 | 20,34 | 0,0% | 0,905 | 0,525 | 1,000 |  |
| sub_ORF1b_V839L | 1 | 0,2% | 1 |  |  |  | 0,3% | 0 | 0,82 | 0,03 | 20,34 | 0,0% | 0,905 | 0,525 | 1,000 |  |
| sub_ORF3a_I63T | 1 | 0,2% | 1 |  |  |  | 0,3% | 0 | 0,82 | 0,03 | 20,34 | 0,0% | 0,905 | 0,525 | 1,000 |  |
| sub_ORF7a_Y40H | 1 | 0,2% | 1 |  |  |  | 0,3% | 0 | 0,82 | 0,03 | 20,34 | 0,0% | 0,905 | 0,525 | 1,000 |  |
| sub_ORF1a_Y118H | 1 | 0,2% | 1 |  |  |  | 0,3% | 0 | 0,82 | 0,03 | 20,34 | 0,0% | 0,905 | 0,525 | 1,000 |  |
| sub_ORF1a_V1750M | 1 | 0,2% | 1 |  |  |  | 0,3% | 0 | 0,82 | 0,03 | 20,34 | 0,0% | 0,905 | 0,525 | 1,000 |  |
| sub_ORF1a_S2255F | 1 | 0,2% | 1 |  |  |  | 0,3% | 0 | 0,82 | 0,03 | 20,34 | 0,0% | 0,905 | 0,525 | 1,000 |  |
| sub_ORF1a_M3621I | 1 | 0,2% | 1 |  |  |  | 0,3% | 0 | 0,82 | 0,03 | 20,34 | 0,0% | 0,905 | 0,525 | 1,000 |  |
| sub_S_V1228L | 1 | 0,2% | 1 |  |  |  | 0,3% | 0 | 0,82 | 0,03 | 20,34 | 0,0% | 0,905 | 0,525 | 1,000 |  |
| sub_ORF1a_T708I | 1 | 0,2% | 1 |  |  |  | 0,3% | 0 | 0,82 | 0,03 | 20,34 | 0,0% | 0,905 | 0,525 | 1,000 |  |
| sub_ORF1a_K2511N | 1 | 0,2% | 1 |  |  |  | 0,3% | 0 | 0,82 | 0,03 | 20,34 | 0,0% | 0,905 | 0,525 | 1,000 |  |
| sub_ORF3a_A110S | 1 | 0,2% | 1 |  |  |  | 0,3% | 0 | 0,82 | 0,03 | 20,34 | 0,0% | 0,905 | 0,525 | 1,000 |  |
| ins__11100__T | 1 | 0,2% | 1 |  |  |  | 0,3% | 0 | 0,82 | 0,03 | 20,34 | 0,0% | 0,905 | 0,525 | 1,000 |  |
| sub_ORF1a_A429V | 1 | 0,2% | 1 |  |  |  | 0,3% | 0 | 0,82 | 0,03 | 20,34 | 0,0% | 0,905 | 0,525 | 1,000 |  |
| sub_ORF1a_I3853V | 1 | 0,2% | 1 |  |  |  | 0,3% | 0 | 0,82 | 0,03 | 20,34 | 0,0% | 0,905 | 0,525 | 1,000 |  |
| sub_ORF7b_V21I | 1 | 0,2% | 1 |  |  |  | 0,3% | 0 | 0,82 | 0,03 | 20,34 | 0,0% | 0,905 | 0,525 | 1,000 |  |
| sub_S_T859I | 1 | 0,2% | 1 |  |  |  | 0,3% | 0 | 0,82 | 0,03 | 20,34 | 0,0% | 0,905 | 0,525 | 1,000 |  |
| sub_ORF1b_P976L | 1 | 0,2% | 1 |  |  |  | 0,3% | 0 | 0,82 | 0,03 | 20,34 | 0,0% | 0,905 | 0,525 | 1,000 |  |
| sub_ORF1b_T2537I | 1 | 0,2% | 1 |  |  |  | 0,3% | 0 | 0,82 | 0,03 | 20,34 | 0,0% | 0,905 | 0,525 | 1,000 |  |
| sub_N_A125V | 1 | 0,2% | 1 |  |  |  | 0,3% | 0 | 0,82 | 0,03 | 20,34 | 0,0% | 0,905 | 0,525 | 1,000 |  |
| sub_ORF1a_M2254V | 1 | 0,2% | 1 |  |  |  | 0,3% | 0 | 0,82 | 0,03 | 20,34 | 0,0% | 0,905 | 0,525 | 1,000 |  |
| sub_ORF9b_A57V | 1 | 0,2% | 1 |  |  |  | 0,3% | 0 | 0,82 | 0,03 | 20,34 | 0,0% | 0,905 | 0,525 | 1,000 |  |
| sub_S_V1065L | 1 | 0,2% | 1 |  |  |  | 0,3% | 0 | 0,82 | 0,03 | 20,34 | 0,0% | 0,905 | 0,525 | 1,000 |  |
| sub_ORF1a_S2289G | 1 | 0,2% | 1 |  |  |  | 0,3% | 0 | 0,82 | 0,03 | 20,34 | 0,0% | 0,905 | 0,525 | 1,000 |  |
| sub_ORF1a_I2858V | 1 | 0,2% | 1 |  |  |  | 0,3% | 0 | 0,82 | 0,03 | 20,34 | 0,0% | 0,905 | 0,525 | 1,000 |  |
| sub_ORF1b_L2213F | 1 | 0,2% | 1 |  |  |  | 0,3% | 0 | 0,82 | 0,03 | 20,34 | 0,0% | 0,905 | 0,525 | 1,000 |  |
| sub_ORF8_F86X | 1 | 0,2% | 1 |  |  |  | 0,3% | 0 | 0,82 | 0,03 | 20,34 | 0,0% | 0,905 | 0,525 | 1,000 |  |
| sub_ORF1b_A2513S | 1 | 0,2% | 1 |  |  |  | 0,3% | 0 | 0,82 | 0,03 | 20,34 | 0,0% | 0,905 | 0,525 | 1,000 |  |
| sub_ORF3a_L65F | 1 | 0,2% | 1 |  |  |  | 0,3% | 0 | 0,82 | 0,03 | 20,34 | 0,0% | 0,905 | 0,525 | 1,000 |  |
| ins__23064__C | 1 | 0,2% | 1 |  |  |  | 0,3% | 0 | 0,82 | 0,03 | 20,34 | 0,0% | 0,905 | 0,525 | 1,000 |  |
| sub_ORF1a_S443F | 1 | 0,2% | 1 |  |  |  | 0,3% | 0 | 0,82 | 0,03 | 20,34 | 0,0% | 0,905 | 0,525 | 1,000 |  |
| sub_ORF1a_E1205K | 1 | 0,2% | 1 |  |  |  | 0,3% | 0 | 0,82 | 0,03 | 20,34 | 0,0% | 0,905 | 0,525 | 1,000 |  |
| sub_ORF1a_A2345V | 1 | 0,2% | 1 |  |  |  | 0,3% | 0 | 0,82 | 0,03 | 20,34 | 0,0% | 0,905 | 0,525 | 1,000 |  |
| sub_ORF1a_S2972F | 1 | 0,2% | 1 |  |  |  | 0,3% | 0 | 0,82 | 0,03 | 20,34 | 0,0% | 0,905 | 0,525 | 1,000 |  |
| sub_S_R21I | 1 | 0,2% | 1 |  |  |  | 0,3% | 0 | 0,82 | 0,03 | 20,34 | 0,0% | 0,905 | 0,525 | 1,000 |  |
| sub_ORF1b_T1064I | 1 | 0,2% | 1 |  |  |  | 0,3% | 0 | 0,82 | 0,03 | 20,34 | 0,0% | 0,905 | 0,525 | 1,000 |  |
| sub_S_S494P | 1 | 0,2% | 1 |  |  |  | 0,3% | 0 | 0,82 | 0,03 | 20,34 | 0,0% | 0,905 | 0,525 | 1,000 |  |
| sub_ORF1b_A1959V | 1 | 0,2% | 1 |  |  |  | 0,3% | 0 | 0,82 | 0,03 | 20,34 | 0,0% | 0,905 | 0,525 | 1,000 |  |
| sub_S_K558N | 1 | 0,2% | 1 |  |  |  | 0,3% | 0 | 0,82 | 0,03 | 20,34 | 0,0% | 0,905 | 0,525 | 1,000 |  |
| sub_ORF1a_E102K | 1 | 0,2% | 1 |  |  |  | 0,3% | 0 | 0,82 | 0,03 | 20,34 | 0,0% | 0,905 | 0,525 | 1,000 |  |
| sub_ORF1a_K1233R | 1 | 0,2% | 1 |  |  |  | 0,3% | 0 | 0,82 | 0,03 | 20,34 | 0,0% | 0,905 | 0,525 | 1,000 |  |
| sub_ORF1a_V1583F | 1 | 0,2% | 1 |  |  |  | 0,3% | 0 | 0,82 | 0,03 | 20,34 | 0,0% | 0,905 | 0,525 | 1,000 |  |
| sub_S_E780Q | 1 | 0,2% | 1 |  |  |  | 0,3% | 0 | 0,82 | 0,03 | 20,34 | 0,0% | 0,905 | 0,525 | 1,000 |  |
| sub_ORF1a_K798R | 1 | 0,2% | 1 |  |  |  | 0,3% | 0 | 0,82 | 0,03 | 20,34 | 0,0% | 0,905 | 0,525 | 1,000 |  |
| sub_S_S939F | 1 | 0,2% | 1 |  |  |  | 0,3% | 0 | 0,82 | 0,03 | 20,34 | 0,0% | 0,905 | 0,525 | 1,000 |  |
| sub_ORF1a_A968V | 1 | 0,2% | 1 |  |  |  | 0,3% | 0 | 0,82 | 0,03 | 20,34 | 0,0% | 0,905 | 0,525 | 1,000 |  |
| sub_ORF1a_Q362L | 1 | 0,2% | 1 |  |  |  | 0,3% | 0 | 0,82 | 0,03 | 20,34 | 0,0% | 0,905 | 0,525 | 1,000 |  |
| sub_ORF1a_D1547G | 1 | 0,2% | 1 |  |  |  | 0,3% | 0 | 0,82 | 0,03 | 20,34 | 0,0% | 0,905 | 0,525 | 1,000 |  |
| sub_ORF1a_T3258I | 1 | 0,2% | 1 |  |  |  | 0,3% | 0 | 0,82 | 0,03 | 20,34 | 0,0% | 0,905 | 0,525 | 1,000 |  |
| sub_ORF1a_L2349M | 1 | 0,2% | 1 |  |  |  | 0,3% | 0 | 0,82 | 0,03 | 20,34 | 0,0% | 0,905 | 0,525 | 1,000 |  |
| sub_ORF9b_I5T | 1 | 0,2% | 1 |  |  |  | 0,3% | 0 | 0,82 | 0,03 | 20,34 | 0,0% | 0,905 | 0,525 | 1,000 |  |
| sub_ORF3a_V256D | 1 | 0,2% | 1 |  |  |  | 0,3% | 0 | 0,82 | 0,03 | 20,34 | 0,0% | 0,905 | 0,525 | 1,000 |  |
| sub_S_G261V | 1 | 0,2% | 1 |  |  |  | 0,3% | 0 | 0,82 | 0,03 | 20,34 | 0,0% | 0,905 | 0,525 | 1,000 |  |
| del_ORF3a_N257m | 1 | 0,2% | 1 |  |  |  | 0,3% | 0 | 0,82 | 0,03 | 20,34 | 0,0% | 0,905 | 0,525 | 1,000 |  |
| sub_N_P151S | 1 | 0,2% | 1 |  |  |  | 0,3% | 0 | 0,82 | 0,03 | 20,34 | 0,0% | 0,905 | 0,525 | 1,000 |  |
| sub_M_R131T | 1 | 0,2% | 1 |  |  |  | 0,3% | 0 | 0,82 | 0,03 | 20,34 | 0,0% | 0,905 | 0,525 | 1,000 |  |
| sub_N_A313V | 1 | 0,2% | 1 |  |  |  | 0,3% | 0 | 0,82 | 0,03 | 20,34 | 0,0% | 0,905 | 0,525 | 1,000 |  |
| sub_ORF1a_T2016I | 1 | 0,2% | 1 |  |  |  | 0,3% | 0 | 0,82 | 0,03 | 20,34 | 0,0% | 0,905 | 0,525 | 1,000 |  |
| sub_ORF1a_T2202S | 1 | 0,2% | 1 |  |  |  | 0,3% | 0 | 0,82 | 0,03 | 20,34 | 0,0% | 0,905 | 0,525 | 1,000 |  |
| sub_ORF1a_E3764Q | 1 | 0,2% | 1 |  |  |  | 0,3% | 0 | 0,82 | 0,03 | 20,34 | 0,0% | 0,905 | 0,525 | 1,000 |  |
| sub_ORF1a_M3997V | 1 | 0,2% | 1 |  |  |  | 0,3% | 0 | 0,82 | 0,03 | 20,34 | 0,0% | 0,905 | 0,525 | 1,000 |  |
| sub_ORF1a_A4052V | 1 | 0,2% | 1 |  |  |  | 0,3% | 0 | 0,82 | 0,03 | 20,34 | 0,0% | 0,905 | 0,525 | 1,000 |  |
| sub_ORF1b_K64R | 1 | 0,2% | 1 |  |  |  | 0,3% | 0 | 0,82 | 0,03 | 20,34 | 0,0% | 0,905 | 0,525 | 1,000 |  |
| sub_ORF1b_W153R | 1 | 0,2% | 1 |  |  |  | 0,3% | 0 | 0,82 | 0,03 | 20,34 | 0,0% | 0,905 | 0,525 | 1,000 |  |
| sub_ORF1b_I2331T | 1 | 0,2% | 1 |  |  |  | 0,3% | 0 | 0,82 | 0,03 | 20,34 | 0,0% | 0,905 | 0,525 | 1,000 |  |
| sub_S_I742L | 1 | 0,2% | 1 |  |  |  | 0,3% | 0 | 0,82 | 0,03 | 20,34 | 0,0% | 0,905 | 0,525 | 1,000 |  |
| sub_S_G1124V | 1 | 0,2% | 1 |  |  |  | 0,3% | 0 | 0,82 | 0,03 | 20,34 | 0,0% | 0,905 | 0,525 | 1,000 |  |
| sub_ORF1b_A1302S | 1 | 0,2% | 1 |  |  |  | 0,3% | 0 | 0,82 | 0,03 | 20,34 | 0,0% | 0,905 | 0,525 | 1,000 |  |
| sub_ORF1b_M1352I | 1 | 0,2% | 1 |  |  |  | 0,3% | 0 | 0,82 | 0,03 | 20,34 | 0,0% | 0,905 | 0,525 | 1,000 |  |
| sub_ORF1b_P2313S | 1 | 0,2% | 1 |  |  |  | 0,3% | 0 | 0,82 | 0,03 | 20,34 | 0,0% | 0,905 | 0,525 | 1,000 |  |
| sub_N_Q229H | 1 | 0,2% | 1 |  |  |  | 0,3% | 0 | 0,82 | 0,03 | 20,34 | 0,0% | 0,905 | 0,525 | 1,000 |  |
| sub_ORF1b_L1351F | 1 | 0,2% | 1 |  |  |  | 0,3% | 0 | 0,82 | 0,03 | 20,34 | 0,0% | 0,905 | 0,525 | 1,000 |  |
| sub_ORF1a_T2859I | 1 | 0,2% | 1 |  |  |  | 0,3% | 0 | 0,82 | 0,03 | 20,34 | 0,0% | 0,905 | 0,525 | 1,000 |  |
| sub_ORF3a_I232F | 1 | 0,2% | 1 |  |  |  | 0,3% | 0 | 0,82 | 0,03 | 20,34 | 0,0% | 0,905 | 0,525 | 1,000 |  |
| sub_S_A1078S | 1 | 0,2% | 1 |  |  |  | 0,3% | 0 | 0,82 | 0,03 | 20,34 | 0,0% | 0,905 | 0,525 | 1,000 |  |
| sub_ORF1a_V4101I | 1 | 0,2% | 1 |  |  |  | 0,3% | 0 | 0,82 | 0,03 | 20,34 | 0,0% | 0,905 | 0,525 | 1,000 |  |
| sub_ORF1a_A2249V | 1 | 0,2% | 1 |  |  |  | 0,3% | 0 | 0,82 | 0,03 | 20,34 | 0,0% | 0,905 | 0,525 | 1,000 |  |
| sub_ORF1b_A1369S | 1 | 0,2% | 1 |  |  |  | 0,3% | 0 | 0,82 | 0,03 | 20,34 | 0,0% | 0,905 | 0,525 | 1,000 |  |
| sub_ORF8_T11I | 1 | 0,2% | 1 |  |  |  | 0,3% | 0 | 0,82 | 0,03 | 20,34 | 0,0% | 0,905 | 0,525 | 1,000 |  |
| sub_S_A1020S | 1 | 0,2% | 1 |  |  |  | 0,3% | 0 | 0,82 | 0,03 | 20,34 | 0,0% | 0,905 | 0,525 | 1,000 |  |
| sub_N_A182S | 1 | 0,2% | 1 |  |  |  | 0,3% | 0 | 0,82 | 0,03 | 20,34 | 0,0% | 0,905 | 0,525 | 1,000 |  |
| sub_ORF1a_T614I | 1 | 0,2% | 1 |  |  |  | 0,3% | 0 | 0,82 | 0,03 | 20,34 | 0,0% | 0,905 | 0,525 | 1,000 |  |
| sub_ORF1a_T1242A | 1 | 0,2% | 1 |  |  |  | 0,3% | 0 | 0,82 | 0,03 | 20,34 | 0,0% | 0,905 | 0,525 | 1,000 |  |
| sub_N_K248N | 1 | 0,2% | 1 |  |  |  | 0,3% | 0 | 0,82 | 0,03 | 20,34 | 0,0% | 0,905 | 0,525 | 1,000 |  |
| sub_ORF1a_L2349W | 1 | 0,2% | 1 |  |  |  | 0,3% | 0 | 0,82 | 0,03 | 20,34 | 0,0% | 0,905 | 0,525 | 1,000 |  |
| sub_ORF7a_R78G | 1 | 0,2% | 1 |  |  |  | 0,3% | 0 | 0,82 | 0,03 | 20,34 | 0,0% | 0,905 | 0,525 | 1,000 |  |
| sub_ORF1a_K141D | 1 | 0,2% | 1 |  |  |  | 0,3% | 0 | 0,82 | 0,03 | 20,34 | 0,0% | 0,905 | 0,525 | 1,000 |  |
| sub_ORF1a_F143L | 1 | 0,2% | 1 |  |  |  | 0,3% | 0 | 0,82 | 0,03 | 20,34 | 0,0% | 0,905 | 0,525 | 1,000 |  |
| sub_ORF1b_N974T | 1 | 0,2% | 1 |  |  |  | 0,3% | 0 | 0,82 | 0,03 | 20,34 | 0,0% | 0,905 | 0,525 | 1,000 |  |
| sub_ORF1b_P2313L | 1 | 0,2% | 1 |  |  |  | 0,3% | 0 | 0,82 | 0,03 | 20,34 | 0,0% | 0,905 | 0,525 | 1,000 |  |
| sub_N_P168S | 1 | 0,2% | 1 |  |  |  | 0,3% | 0 | 0,82 | 0,03 | 20,34 | 0,0% | 0,905 | 0,525 | 1,000 |  |
| sub_ORF1a_C2180S | 1 | 0,2% | 1 |  |  |  | 0,3% | 0 | 0,82 | 0,03 | 20,34 | 0,0% | 0,905 | 0,525 | 1,000 |  |
| sub_ORF1b_P1325S | 1 | 0,2% | 1 |  |  |  | 0,3% | 0 | 0,82 | 0,03 | 20,34 | 0,0% | 0,905 | 0,525 | 1,000 |  |
| sub_ORF1a_T2967I | 1 | 0,2% | 1 |  |  |  | 0,3% | 0 | 0,82 | 0,03 | 20,34 | 0,0% | 0,905 | 0,525 | 1,000 |  |
| sub_ORF7a_A64V | 1 | 0,2% | 1 |  |  |  | 0,3% | 0 | 0,82 | 0,03 | 20,34 | 0,0% | 0,905 | 0,525 | 1,000 |  |
| sub_ORF1a_S1106N | 1 | 0,2% | 1 |  |  |  | 0,3% | 0 | 0,82 | 0,03 | 20,34 | 0,0% | 0,905 | 0,525 | 1,000 |  |
| sub_ORF1a_P1921S | 1 | 0,2% | 1 |  |  |  | 0,3% | 0 | 0,82 | 0,03 | 20,34 | 0,0% | 0,905 | 0,525 | 1,000 |  |
| sub_ORF1b_I1468T | 1 | 0,2% | 1 |  |  |  | 0,3% | 0 | 0,82 | 0,03 | 20,34 | 0,0% | 0,905 | 0,525 | 1,000 |  |
| sub_M_S94N | 1 | 0,2% | 1 |  |  |  | 0,3% | 0 | 0,82 | 0,03 | 20,34 | 0,0% | 0,905 | 0,525 | 1,000 |  |
| sub_S_A694V | 1 | 0,2% | 1 |  |  |  | 0,3% | 0 | 0,82 | 0,03 | 20,34 | 0,0% | 0,905 | 0,525 | 1,000 |  |
| sub_S_K1266R | 1 | 0,2% | 1 |  |  |  | 0,3% | 0 | 0,82 | 0,03 | 20,34 | 0,0% | 0,905 | 0,525 | 1,000 |  |
| sub_S_W152L | 1 | 0,2% | 1 |  |  |  | 0,3% | 0 | 0,82 | 0,03 | 20,34 | 0,0% | 0,905 | 0,525 | 1,000 |  |
| sub_S_D574Y | 1 | 0,2% | 1 |  |  |  | 0,3% | 0 | 0,82 | 0,03 | 20,34 | 0,0% | 0,905 | 0,525 | 1,000 |  |
| sub_ORF1b_R240K | 1 | 0,2% | 1 |  |  |  | 0,3% | 0 | 0,82 | 0,03 | 20,34 | 0,0% | 0,905 | 0,525 | 1,000 |  |
| sub_ORF1a_P276S | 1 | 0,2% | 1 |  |  |  | 0,3% | 0 | 0,82 | 0,03 | 20,34 | 0,0% | 0,905 | 0,525 | 1,000 |  |
| sub_ORF1a_H1974Y | 1 | 0,2% | 1 |  |  |  | 0,3% | 0 | 0,82 | 0,03 | 20,34 | 0,0% | 0,905 | 0,525 | 1,000 |  |
| sub_ORF1a_V2066M | 1 | 0,2% | 1 |  |  |  | 0,3% | 0 | 0,82 | 0,03 | 20,34 | 0,0% | 0,905 | 0,525 | 1,000 |  |
| sub_ORF1b_R1109C | 1 | 0,2% | 1 |  |  |  | 0,3% | 0 | 0,82 | 0,03 | 20,34 | 0,0% | 0,905 | 0,525 | 1,000 |  |
| sub_ORF3a_M260V | 1 | 0,2% | 1 |  |  |  | 0,3% | 0 | 0,82 | 0,03 | 20,34 | 0,0% | 0,905 | 0,525 | 1,000 |  |
| sub_ORF1a_N2065S | 1 | 0,2% | 1 |  |  |  | 0,3% | 0 | 0,82 | 0,03 | 20,34 | 0,0% | 0,905 | 0,525 | 1,000 |  |
| sub_S_S254F | 1 | 0,2% | 1 |  |  |  | 0,3% | 0 | 0,82 | 0,03 | 20,34 | 0,0% | 0,905 | 0,525 | 1,000 |  |
| sub_ORF1a_I2309X | 1 | 0,2% | 1 |  |  |  | 0,3% | 0 | 0,82 | 0,03 | 20,34 | 0,0% | 0,905 | 0,525 | 1,000 |  |
| sub_ORF1a_E2990 | 1 | 0,2% | 1 |  |  |  | 0,3% | 0 | 0,82 | 0,03 | 20,34 | 0,0% | 0,905 | 0,525 | 1,000 |  |
| sub_ORF1b_L1933F | 1 | 0,2% | 1 |  |  |  | 0,3% | 0 | 0,82 | 0,03 | 20,34 | 0,0% | 0,905 | 0,525 | 1,000 |  |
| sub_ORF1b_Y2276X | 1 | 0,2% | 1 |  |  |  | 0,3% | 0 | 0,82 | 0,03 | 20,34 | 0,0% | 0,905 | 0,525 | 1,000 |  |
| sub_ORF1b_K2277X | 1 | 0,2% | 1 |  |  |  | 0,3% | 0 | 0,82 | 0,03 | 20,34 | 0,0% | 0,905 | 0,525 | 1,000 |  |
| sub_ORF3a_W69L | 1 | 0,2% | 1 |  |  |  | 0,3% | 0 | 0,82 | 0,03 | 20,34 | 0,0% | 0,905 | 0,525 | 1,000 |  |
| sub_ORF6_D6H | 1 | 0,2% | 1 |  |  |  | 0,3% | 0 | 0,82 | 0,03 | 20,34 | 0,0% | 0,905 | 0,525 | 1,000 |  |
| sub_ORF1a_G3617S | 1 | 0,2% | 1 |  |  |  | 0,3% | 0 | 0,82 | 0,03 | 20,34 | 0,0% | 0,905 | 0,525 | 1,000 |  |
| sub_ORF1a_M3669I | 1 | 0,2% | 1 |  |  |  | 0,3% | 0 | 0,82 | 0,03 | 20,34 | 0,0% | 0,905 | 0,525 | 1,000 |  |
| sub_ORF8_H17Y | 1 | 0,2% | 1 |  |  |  | 0,3% | 0 | 0,82 | 0,03 | 20,34 | 0,0% | 0,905 | 0,525 | 1,000 |  |
| sub_ORF3a_V97I | 1 | 0,2% | 1 |  |  |  | 0,3% | 0 | 0,82 | 0,03 | 20,34 | 0,0% | 0,905 | 0,525 | 1,000 |  |
| sub_ORF1a_A591V | 1 | 0,2% | 1 |  |  |  | 0,3% | 0 | 0,82 | 0,03 | 20,34 | 0,0% | 0,905 | 0,525 | 1,000 |  |
| sub_ORF1b_V1983L | 1 | 0,2% | 1 |  |  |  | 0,3% | 0 | 0,82 | 0,03 | 20,34 | 0,0% | 0,905 | 0,525 | 1,000 |  |
| sub_S_Y508H | 1 | 0,2% | 1 |  |  |  | 0,3% | 0 | 0,82 | 0,03 | 20,34 | 0,0% | 0,905 | 0,525 | 1,000 |  |
| sub_ORF1a_I3758V | 1 | 0,2% | 1 |  |  |  | 0,3% | 0 | 0,82 | 0,03 | 20,34 | 0,0% | 0,905 | 0,525 | 1,000 |  |
| sub_S_P384L | 1 | 0,2% | 1 |  |  |  | 0,3% | 0 | 0,82 | 0,03 | 20,34 | 0,0% | 0,905 | 0,525 | 1,000 |  |
| sub_ORF1a_D147N | 1 | 0,2% | 1 |  |  |  | 0,3% | 0 | 0,82 | 0,03 | 20,34 | 0,0% | 0,905 | 0,525 | 1,000 |  |
| sub_ORF3a_G44V | 1 | 0,2% | 1 |  |  |  | 0,3% | 0 | 0,82 | 0,03 | 20,34 | 0,0% | 0,905 | 0,525 | 1,000 |  |
| sub_ORF1a_S1476V | 1 | 0,2% | 1 |  |  |  | 0,3% | 0 | 0,82 | 0,03 | 20,34 | 0,0% | 0,905 | 0,525 | 1,000 |  |
| sub_ORF1a_P1541T | 1 | 0,2% | 1 |  |  |  | 0,3% | 0 | 0,82 | 0,03 | 20,34 | 0,0% | 0,905 | 0,525 | 1,000 |  |
| sub_ORF1a_G2461V | 1 | 0,2% | 1 |  |  |  | 0,3% | 0 | 0,82 | 0,03 | 20,34 | 0,0% | 0,905 | 0,525 | 1,000 |  |
| sub_ORF1a_R2887G | 1 | 0,2% | 1 |  |  |  | 0,3% | 0 | 0,82 | 0,03 | 20,34 | 0,0% | 0,905 | 0,525 | 1,000 |  |
| sub_ORF1a_R2953C | 1 | 0,2% | 1 |  |  |  | 0,3% | 0 | 0,82 | 0,03 | 20,34 | 0,0% | 0,905 | 0,525 | 1,000 |  |
| sub_ORF1b_V173X | 1 | 0,2% | 1 |  |  |  | 0,3% | 0 | 0,82 | 0,03 | 20,34 | 0,0% | 0,905 | 0,525 | 1,000 |  |
| sub_ORF1b_G674 | 1 | 0,2% | 1 |  |  |  | 0,3% | 0 | 0,82 | 0,03 | 20,34 | 0,0% | 0,905 | 0,525 | 1,000 |  |
| sub_ORF7b_C12Y | 1 | 0,2% | 1 |  |  |  | 0,3% | 0 | 0,82 | 0,03 | 20,34 | 0,0% | 0,905 | 0,525 | 1,000 |  |
| sub_S_F1075L | 1 | 0,2% | 1 |  |  |  | 0,3% | 0 | 0,82 | 0,03 | 20,34 | 0,0% | 0,905 | 0,525 | 1,000 |  |
| ins__14174__G | 1 | 0,2% | 1 |  |  |  | 0,3% | 0 | 0,82 | 0,03 | 20,34 | 0,0% | 0,905 | 0,525 | 1,000 |  |
| sub_ORF1a_S528L | 1 | 0,2% | 1 |  |  |  | 0,3% | 0 | 0,82 | 0,03 | 20,34 | 0,0% | 0,905 | 0,525 | 1,000 |  |
| sub_ORF1a_A2584T | 1 | 0,2% | 1 |  |  |  | 0,3% | 0 | 0,82 | 0,03 | 20,34 | 0,0% | 0,905 | 0,525 | 1,000 |  |
| sub_ORF1a_L3352F | 1 | 0,2% | 1 |  |  |  | 0,3% | 0 | 0,82 | 0,03 | 20,34 | 0,0% | 0,905 | 0,525 | 1,000 |  |
| sub_ORF1b_A88V | 1 | 0,2% | 1 |  |  |  | 0,3% | 0 | 0,82 | 0,03 | 20,34 | 0,0% | 0,905 | 0,525 | 1,000 |  |
| sub_ORF1b_S316I | 1 | 0,2% | 1 |  |  |  | 0,3% | 0 | 0,82 | 0,03 | 20,34 | 0,0% | 0,905 | 0,525 | 1,000 |  |
| sub_ORF1b_D1758G | 1 | 0,2% | 1 |  |  |  | 0,3% | 0 | 0,82 | 0,03 | 20,34 | 0,0% | 0,905 | 0,525 | 1,000 |  |
| sub_ORF1a_T4304I | 1 | 0,2% | 1 |  |  |  | 0,3% | 0 | 0,82 | 0,03 | 20,34 | 0,0% | 0,905 | 0,525 | 1,000 |  |
| sub_ORF9b_S50L | 1 | 0,2% | 1 |  |  |  | 0,3% | 0 | 0,82 | 0,03 | 20,34 | 0,0% | 0,905 | 0,525 | 1,000 |  |
| sub_S_N450K | 1 | 0,2% | 1 |  |  |  | 0,3% | 0 | 0,82 | 0,03 | 20,34 | 0,0% | 0,905 | 0,525 | 1,000 |  |
| sub_ORF1a_K292N | 1 | 0,2% | 1 |  |  |  | 0,3% | 0 | 0,82 | 0,03 | 20,34 | 0,0% | 0,905 | 0,525 | 1,000 |  |
| sub_ORF1a_A307V | 1 | 0,2% | 1 |  |  |  | 0,3% | 0 | 0,82 | 0,03 | 20,34 | 0,0% | 0,905 | 0,525 | 1,000 |  |
| sub_ORF1a_P1640L | 1 | 0,2% | 1 |  |  |  | 0,3% | 0 | 0,82 | 0,03 | 20,34 | 0,0% | 0,905 | 0,525 | 1,000 |  |
| sub_ORF1a_S2661F | 1 | 0,2% | 1 |  |  |  | 0,3% | 0 | 0,82 | 0,03 | 20,34 | 0,0% | 0,905 | 0,525 | 1,000 |  |
| sub_ORF1b_L2170I | 1 | 0,2% | 1 |  |  |  | 0,3% | 0 | 0,82 | 0,03 | 20,34 | 0,0% | 0,905 | 0,525 | 1,000 |  |
| sub_ORF1b_F2174X | 1 | 0,2% | 1 |  |  |  | 0,3% | 0 | 0,82 | 0,03 | 20,34 | 0,0% | 0,905 | 0,525 | 1,000 |  |
| sub_ORF3a_S74F | 1 | 0,2% | 1 |  |  |  | 0,3% | 0 | 0,82 | 0,03 | 20,34 | 0,0% | 0,905 | 0,525 | 1,000 |  |
| sub_ORF7a_S60N | 1 | 0,2% | 1 |  |  |  | 0,3% | 0 | 0,82 | 0,03 | 20,34 | 0,0% | 0,905 | 0,525 | 1,000 |  |
| ins__22208__GAGA | 1 | 0,2% | 1 |  |  |  | 0,3% | 0 | 0,82 | 0,03 | 20,34 | 0,0% | 0,905 | 0,525 | 1,000 |  |
| sub_ORF1a_V84A | 1 | 0,2% | 1 |  |  |  | 0,3% | 0 | 0,82 | 0,03 | 20,34 | 0,0% | 0,905 | 0,525 | 1,000 |  |
| sub_ORF1a_A354V | 1 | 0,2% | 1 |  |  |  | 0,3% | 0 | 0,82 | 0,03 | 20,34 | 0,0% | 0,905 | 0,525 | 1,000 |  |
| sub_ORF1a_L3674F | 1 | 0,2% | 1 |  |  |  | 0,3% | 0 | 0,82 | 0,03 | 20,34 | 0,0% | 0,905 | 0,525 | 1,000 |  |
| sub_ORF1b_M659I | 1 | 0,2% | 1 |  |  |  | 0,3% | 0 | 0,82 | 0,03 | 20,34 | 0,0% | 0,905 | 0,525 | 1,000 |  |
| sub_ORF1a_D139N | 1 | 0,2% | 1 |  |  |  | 0,3% | 0 | 0,82 | 0,03 | 20,34 | 0,0% | 0,905 | 0,525 | 1,000 |  |
| sub_ORF1a_S391F | 1 | 0,2% | 1 |  |  |  | 0,3% | 0 | 0,82 | 0,03 | 20,34 | 0,0% | 0,905 | 0,525 | 1,000 |  |
| sub_ORF1b_T17I | 1 | 0,2% | 1 |  |  |  | 0,3% | 0 | 0,82 | 0,03 | 20,34 | 0,0% | 0,905 | 0,525 | 1,000 |  |
| sub_ORF1a_I2501T | 1 | 0,2% | 1 |  |  |  | 0,3% | 0 | 0,82 | 0,03 | 20,34 | 0,0% | 0,905 | 0,525 | 1,000 |  |
| sub_ORF1a_E3764D | 1 | 0,2% | 1 |  |  |  | 0,3% | 0 | 0,82 | 0,03 | 20,34 | 0,0% | 0,905 | 0,525 | 1,000 |  |
| sub_ORF1a_M4241I | 1 | 0,2% | 1 |  |  |  | 0,3% | 0 | 0,82 | 0,03 | 20,34 | 0,0% | 0,905 | 0,525 | 1,000 |  |
| sub_ORF1b_V711I | 1 | 0,2% | 1 |  |  |  | 0,3% | 0 | 0,82 | 0,03 | 20,34 | 0,0% | 0,905 | 0,525 | 1,000 |  |
| sub_ORF1b_T1178I | 1 | 0,2% | 1 |  |  |  | 0,3% | 0 | 0,82 | 0,03 | 20,34 | 0,0% | 0,905 | 0,525 | 1,000 |  |
| sub_ORF1b_H1213Y | 1 | 0,2% | 1 |  |  |  | 0,3% | 0 | 0,82 | 0,03 | 20,34 | 0,0% | 0,905 | 0,525 | 1,000 |  |
| sub_ORF1b_A1521S | 1 | 0,2% | 1 |  |  |  | 0,3% | 0 | 0,82 | 0,03 | 20,34 | 0,0% | 0,905 | 0,525 | 1,000 |  |
| sub_ORF3a_A72S | 1 | 0,2% | 1 |  |  |  | 0,3% | 0 | 0,82 | 0,03 | 20,34 | 0,0% | 0,905 | 0,525 | 1,000 |  |
| sub_ORF8_A65G | 1 | 0,2% | 1 |  |  |  | 0,3% | 0 | 0,82 | 0,03 | 20,34 | 0,0% | 0,905 | 0,525 | 1,000 |  |
| sub_S_N439K | 1 | 0,2% | 1 |  |  |  | 0,3% | 0 | 0,82 | 0,03 | 20,34 | 0,0% | 0,905 | 0,525 | 1,000 |  |
| sub_S_Q872L | 1 | 0,2% | 1 |  |  |  | 0,3% | 0 | 0,82 | 0,03 | 20,34 | 0,0% | 0,905 | 0,525 | 1,000 |  |
| sub_N_S194L | 1 | 0,2% | 1 |  |  |  | 0,3% | 0 | 0,82 | 0,03 | 20,34 | 0,0% | 0,905 | 0,525 | 1,000 |  |
| sub_ORF1a_P1054S | 1 | 0,2% | 1 |  |  |  | 0,3% | 0 | 0,82 | 0,03 | 20,34 | 0,0% | 0,905 | 0,525 | 1,000 |  |
| sub_ORF1a_T3940I | 1 | 0,2% | 1 |  |  |  | 0,3% | 0 | 0,82 | 0,03 | 20,34 | 0,0% | 0,905 | 0,525 | 1,000 |  |
| sub_ORF1b_G16V | 1 | 0,2% | 1 |  |  |  | 0,3% | 0 | 0,82 | 0,03 | 20,34 | 0,0% | 0,905 | 0,525 | 1,000 |  |
| sub_ORF1b_V2128A | 1 | 0,2% | 1 |  |  |  | 0,3% | 0 | 0,82 | 0,03 | 20,34 | 0,0% | 0,905 | 0,525 | 1,000 |  |
| sub_S_V1104L | 1 | 0,2% | 1 |  |  |  | 0,3% | 0 | 0,82 | 0,03 | 20,34 | 0,0% | 0,905 | 0,525 | 1,000 |  |
| sub_ORF1a_R226K | 1 | 0,2% | 1 |  |  |  | 0,3% | 0 | 0,82 | 0,03 | 20,34 | 0,0% | 0,905 | 0,525 | 1,000 |  |
| sub_ORF1a_T436I | 1 | 0,2% | 1 |  |  |  | 0,3% | 0 | 0,82 | 0,03 | 20,34 | 0,0% | 0,905 | 0,525 | 1,000 |  |
| sub_N_E253D | 1 | 0,2% | 1 |  |  |  | 0,3% | 0 | 0,82 | 0,03 | 20,34 | 0,0% | 0,905 | 0,525 | 1,000 |  |
| sub_ORF1a_D846E | 1 | 0,2% | 1 |  |  |  | 0,3% | 0 | 0,82 | 0,03 | 20,34 | 0,0% | 0,905 | 0,525 | 1,000 |  |
| sub_ORF1a_Q1800L | 1 | 0,2% | 1 |  |  |  | 0,3% | 0 | 0,82 | 0,03 | 20,34 | 0,0% | 0,905 | 0,525 | 1,000 |  |
| sub_S_E819D | 1 | 0,2% | 1 |  |  |  | 0,3% | 0 | 0,82 | 0,03 | 20,34 | 0,0% | 0,905 | 0,525 | 1,000 |  |
| sub_N_S105G | 1 | 0,2% | 1 |  |  |  | 0,3% | 0 | 0,82 | 0,03 | 20,34 | 0,0% | 0,905 | 0,525 | 1,000 |  |
| sub_ORF1a_G442S | 1 | 0,2% | 1 |  |  |  | 0,3% | 0 | 0,82 | 0,03 | 20,34 | 0,0% | 0,905 | 0,525 | 1,000 |  |
| sub_ORF1a_R1464Q | 1 | 0,2% | 1 |  |  |  | 0,3% | 0 | 0,82 | 0,03 | 20,34 | 0,0% | 0,905 | 0,525 | 1,000 |  |
| sub_ORF1b_A190V | 1 | 0,2% | 1 |  |  |  | 0,3% | 0 | 0,82 | 0,03 | 20,34 | 0,0% | 0,905 | 0,525 | 1,000 |  |
| sub_ORF1b_V1706L | 1 | 0,2% | 1 |  |  |  | 0,3% | 0 | 0,82 | 0,03 | 20,34 | 0,0% | 0,905 | 0,525 | 1,000 |  |
| sub_ORF1b_A2143V | 1 | 0,2% | 1 |  |  |  | 0,3% | 0 | 0,82 | 0,03 | 20,34 | 0,0% | 0,905 | 0,525 | 1,000 |  |
| sub_ORF1a_D3042N | 1 | 0,2% | 1 |  |  |  | 0,3% | 0 | 0,82 | 0,03 | 20,34 | 0,0% | 0,905 | 0,525 | 1,000 |  |
| sub_ORF1b_E2390K | 1 | 0,2% | 1 |  |  |  | 0,3% | 0 | 0,82 | 0,03 | 20,34 | 0,0% | 0,905 | 0,525 | 1,000 |  |
| sub_ORF8_Q27T | 1 | 0,2% | 1 |  |  |  | 0,3% | 0 | 0,82 | 0,03 | 20,34 | 0,0% | 0,905 | 0,525 | 1,000 |  |
| sub_ORF8_D35Y | 1 | 0,2% | 1 |  |  |  | 0,3% | 0 | 0,82 | 0,03 | 20,34 | 0,0% | 0,905 | 0,525 | 1,000 |  |
| sub_ORF1a_G993D | 1 | 0,2% | 1 |  |  |  | 0,3% | 0 | 0,82 | 0,03 | 20,34 | 0,0% | 0,905 | 0,525 | 1,000 |  |
| sub_ORF1a_I3522L | 1 | 0,2% | 1 |  |  |  | 0,3% | 0 | 0,82 | 0,03 | 20,34 | 0,0% | 0,905 | 0,525 | 1,000 |  |
| sub_ORF8_L4P | 1 | 0,2% | 1 |  |  |  | 0,3% | 0 | 0,82 | 0,03 | 20,34 | 0,0% | 0,905 | 0,525 | 1,000 |  |
| sub_ORF8_A65V | 1 | 0,2% | 1 |  |  |  | 0,3% | 0 | 0,82 | 0,03 | 20,34 | 0,0% | 0,905 | 0,525 | 1,000 |  |
| sub_N_S416L | 1 | 0,2% | 1 |  |  |  | 0,3% | 0 | 0,82 | 0,03 | 20,34 | 0,0% | 0,905 | 0,525 | 1,000 |  |
| sub_ORF1a_P2110H | 1 | 0,2% | 1 |  |  |  | 0,3% | 0 | 0,82 | 0,03 | 20,34 | 0,0% | 0,905 | 0,525 | 1,000 |  |
| sub_ORF1a_T2952I | 1 | 0,2% | 1 |  |  |  | 0,3% | 0 | 0,82 | 0,03 | 20,34 | 0,0% | 0,905 | 0,525 | 1,000 |  |
| sub_ORF8_V62M | 1 | 0,2% | 1 |  |  |  | 0,3% | 0 | 0,82 | 0,03 | 20,34 | 0,0% | 0,905 | 0,525 | 1,000 |  |
| sub_ORF1a_V1085F | 1 | 0,2% | 1 |  |  |  | 0,3% | 0 | 0,82 | 0,03 | 20,34 | 0,0% | 0,905 | 0,525 | 1,000 |  |
| sub_ORF3a_V55F | 1 | 0,2% | 1 |  |  |  | 0,3% | 0 | 0,82 | 0,03 | 20,34 | 0,0% | 0,905 | 0,525 | 1,000 |  |
| sub_ORF1a_R1421K | 1 | 0,2% | 1 |  |  |  | 0,3% | 0 | 0,82 | 0,03 | 20,34 | 0,0% | 0,905 | 0,525 | 1,000 |  |
| sub_ORF1b_P1567L | 1 | 0,2% | 1 |  |  |  | 0,3% | 0 | 0,82 | 0,03 | 20,34 | 0,0% | 0,905 | 0,525 | 1,000 |  |
| sub_ORF1a_H1160Y | 1 | 0,2% | 1 |  |  |  | 0,3% | 0 | 0,82 | 0,03 | 20,34 | 0,0% | 0,905 | 0,525 | 1,000 |  |
| sub_ORF1a_T1828I | 1 | 0,2% | 1 |  |  |  | 0,3% | 0 | 0,82 | 0,03 | 20,34 | 0,0% | 0,905 | 0,525 | 1,000 |  |
| sub_ORF1a_N1922S | 1 | 0,2% | 1 |  |  |  | 0,3% | 0 | 0,82 | 0,03 | 20,34 | 0,0% | 0,905 | 0,525 | 1,000 |  |
| sub_ORF1a_A4396V | 1 | 0,2% | 1 |  |  |  | 0,3% | 0 | 0,82 | 0,03 | 20,34 | 0,0% | 0,905 | 0,525 | 1,000 |  |
| sub_N_G243C | 1 | 0,2% | 1 |  |  |  | 0,3% | 0 | 0,82 | 0,03 | 20,34 | 0,0% | 0,905 | 0,525 | 1,000 |  |
| sub_ORF1b_M657I | 1 | 0,2% | 1 |  |  |  | 0,3% | 0 | 0,82 | 0,03 | 20,34 | 0,0% | 0,905 | 0,525 | 1,000 |  |
| ins__8089__A | 1 | 0,2% | 1 |  |  |  | 0,3% | 0 | 0,82 | 0,03 | 20,34 | 0,0% | 0,905 | 0,525 | 1,000 |  |
| sub_ORF1a_T3750I | 1 | 0,2% | 1 |  |  |  | 0,3% | 0 | 0,82 | 0,03 | 20,34 | 0,0% | 0,905 | 0,525 | 1,000 |  |
| sub_ORF1b_D870Y | 1 | 0,2% | 1 |  |  |  | 0,3% | 0 | 0,82 | 0,03 | 20,34 | 0,0% | 0,905 | 0,525 | 1,000 |  |
| sub_ORF1b_H1213R | 1 | 0,2% | 1 |  |  |  | 0,3% | 0 | 0,82 | 0,03 | 20,34 | 0,0% | 0,905 | 0,525 | 1,000 |  |
| sub_ORF1b_D2183Y | 1 | 0,2% | 1 |  |  |  | 0,3% | 0 | 0,82 | 0,03 | 20,34 | 0,0% | 0,905 | 0,525 | 1,000 |  |
| sub_ORF1a_Q2840K | 1 | 0,2% | 1 |  |  |  | 0,3% | 0 | 0,82 | 0,03 | 20,34 | 0,0% | 0,905 | 0,525 | 1,000 |  |
| sub_S_S494A | 1 | 0,2% | 1 |  |  |  | 0,3% | 0 | 0,82 | 0,03 | 20,34 | 0,0% | 0,905 | 0,525 | 1,000 |  |
| sub_ORF1a_E37G | 1 | 0,2% | 1 |  |  |  | 0,3% | 0 | 0,82 | 0,03 | 20,34 | 0,0% | 0,905 | 0,525 | 1,000 |  |
| sub_ORF1a_T346I | 1 | 0,2% | 1 |  |  |  | 0,3% | 0 | 0,82 | 0,03 | 20,34 | 0,0% | 0,905 | 0,525 | 1,000 |  |
| sub_ORF1a_H388Y | 1 | 0,2% | 1 |  |  |  | 0,3% | 0 | 0,82 | 0,03 | 20,34 | 0,0% | 0,905 | 0,525 | 1,000 |  |
| sub_ORF1a_P1596L | 1 | 0,2% | 1 |  |  |  | 0,3% | 0 | 0,82 | 0,03 | 20,34 | 0,0% | 0,905 | 0,525 | 1,000 |  |
| sub_ORF1a_A2690V | 1 | 0,2% | 1 |  |  |  | 0,3% | 0 | 0,82 | 0,03 | 20,34 | 0,0% | 0,905 | 0,525 | 1,000 |  |
| sub_ORF3a_H78Q | 1 | 0,2% | 1 |  |  |  | 0,3% | 0 | 0,82 | 0,03 | 20,34 | 0,0% | 0,905 | 0,525 | 1,000 |  |
| sub_S_Q23H | 1 | 0,2% | 1 |  |  |  | 0,3% | 0 | 0,82 | 0,03 | 20,34 | 0,0% | 0,905 | 0,525 | 1,000 |  |
| sub_S_P1162S | 1 | 0,2% | 1 |  |  |  | 0,3% | 0 | 0,82 | 0,03 | 20,34 | 0,0% | 0,905 | 0,525 | 1,000 |  |
| sub_ORF1a_T2158I | 1 | 0,2% | 1 |  |  |  | 0,3% | 0 | 0,82 | 0,03 | 20,34 | 0,0% | 0,905 | 0,525 | 1,000 |  |
| sub_ORF1a_S3001N | 1 | 0,2% | 1 |  |  |  | 0,3% | 0 | 0,82 | 0,03 | 20,34 | 0,0% | 0,905 | 0,525 | 1,000 |  |
| sub_ORF1a_R3542C | 1 | 0,2% | 1 |  |  |  | 0,3% | 0 | 0,82 | 0,03 | 20,34 | 0,0% | 0,905 | 0,525 | 1,000 |  |
| sub_S_L179I | 1 | 0,2% | 1 |  |  |  | 0,3% | 0 | 0,82 | 0,03 | 20,34 | 0,0% | 0,905 | 0,525 | 1,000 |  |
| sub_S_G1167V | 1 | 0,2% | 1 |  |  |  | 0,3% | 0 | 0,82 | 0,03 | 20,34 | 0,0% | 0,905 | 0,525 | 1,000 |  |
| sub_ORF1a_K247N | 1 | 0,2% | 1 |  |  |  | 0,3% | 0 | 0,82 | 0,03 | 20,34 | 0,0% | 0,905 | 0,525 | 1,000 |  |
| sub_ORF1a_M731I | 1 | 0,2% | 1 |  |  |  | 0,3% | 0 | 0,82 | 0,03 | 20,34 | 0,0% | 0,905 | 0,525 | 1,000 |  |
| sub_M_K14R | 1 | 0,2% | 1 |  |  |  | 0,3% | 0 | 0,82 | 0,03 | 20,34 | 0,0% | 0,905 | 0,525 | 1,000 |  |
| sub_ORF1a_E41G | 1 | 0,2% | 1 |  |  |  | 0,3% | 0 | 0,82 | 0,03 | 20,34 | 0,0% | 0,905 | 0,525 | 1,000 |  |
| sub_ORF1a_V757I | 1 | 0,2% | 1 |  |  |  | 0,3% | 0 | 0,82 | 0,03 | 20,34 | 0,0% | 0,905 | 0,525 | 1,000 |  |
| sub_ORF1a_K1895N | 1 | 0,2% | 1 |  |  |  | 0,3% | 0 | 0,82 | 0,03 | 20,34 | 0,0% | 0,905 | 0,525 | 1,000 |  |
| sub_ORF1b_V2089F | 1 | 0,2% | 1 |  |  |  | 0,3% | 0 | 0,82 | 0,03 | 20,34 | 0,0% | 0,905 | 0,525 | 1,000 |  |
| sub_ORF1b_T2488M | 1 | 0,2% | 1 |  |  |  | 0,3% | 0 | 0,82 | 0,03 | 20,34 | 0,0% | 0,905 | 0,525 | 1,000 |  |
| sub_ORF3a_Q185H | 1 | 0,2% | 1 |  |  |  | 0,3% | 0 | 0,82 | 0,03 | 20,34 | 0,0% | 0,905 | 0,525 | 1,000 |  |
| sub_N_T379I | 1 | 0,2% | 1 |  |  |  | 0,3% | 0 | 0,82 | 0,03 | 20,34 | 0,0% | 0,905 | 0,525 | 1,000 |  |
| sub_ORF1a_I431M | 1 | 0,2% | 1 |  |  |  | 0,3% | 0 | 0,82 | 0,03 | 20,34 | 0,0% | 0,905 | 0,525 | 1,000 |  |
| sub_ORF1b_K594G | 1 | 0,2% | 1 |  |  |  | 0,3% | 0 | 0,82 | 0,03 | 20,34 | 0,0% | 0,905 | 0,525 | 1,000 |  |
| sub_ORF8_V5F | 1 | 0,2% | 1 |  |  |  | 0,3% | 0 | 0,82 | 0,03 | 20,34 | 0,0% | 0,905 | 0,525 | 1,000 |  |
| sub_ORF1a_P4337S | 1 | 0,2% | 1 |  |  |  | 0,3% | 0 | 0,82 | 0,03 | 20,34 | 0,0% | 0,905 | 0,525 | 1,000 |  |
| sub_S_V143F | 1 | 0,2% | 1 |  |  |  | 0,3% | 0 | 0,82 | 0,03 | 20,34 | 0,0% | 0,905 | 0,525 | 1,000 |  |
| sub_ORF1a_V1169I | 1 | 0,2% | 1 |  |  |  | 0,3% | 0 | 0,82 | 0,03 | 20,34 | 0,0% | 0,905 | 0,525 | 1,000 |  |
| sub_ORF1a_L2853F | 1 | 0,2% | 1 |  |  |  | 0,3% | 0 | 0,82 | 0,03 | 20,34 | 0,0% | 0,905 | 0,525 | 1,000 |  |
| sub_ORF1a_V3810G | 1 | 0,2% | 1 |  |  |  | 0,3% | 0 | 0,82 | 0,03 | 20,34 | 0,0% | 0,905 | 0,525 | 1,000 |  |
| sub_S_G1099D | 1 | 0,2% | 1 |  |  |  | 0,3% | 0 | 0,82 | 0,03 | 20,34 | 0,0% | 0,905 | 0,525 | 1,000 |  |
| sub_ORF1a_C420Y | 1 | 0,2% | 1 |  |  |  | 0,3% | 0 | 0,82 | 0,03 | 20,34 | 0,0% | 0,905 | 0,525 | 1,000 |  |
| sub_ORF1a_G445C | 1 | 0,2% | 1 |  |  |  | 0,3% | 0 | 0,82 | 0,03 | 20,34 | 0,0% | 0,905 | 0,525 | 1,000 |  |
| sub_ORF1b_Q1441H | 1 | 0,2% | 1 |  |  |  | 0,3% | 0 | 0,82 | 0,03 | 20,34 | 0,0% | 0,905 | 0,525 | 1,000 |  |
| sub_N_H145Y | 1 | 0,2% | 1 |  |  |  | 0,3% | 0 | 0,82 | 0,03 | 20,34 | 0,0% | 0,905 | 0,525 | 1,000 |  |
| sub_ORF1a_R398C | 1 | 0,2% | 1 |  |  |  | 0,3% | 0 | 0,82 | 0,03 | 20,34 | 0,0% | 0,905 | 0,525 | 1,000 |  |
| sub_ORF1a_E640D | 1 | 0,2% | 1 |  |  |  | 0,3% | 0 | 0,82 | 0,03 | 20,34 | 0,0% | 0,905 | 0,525 | 1,000 |  |
| sub_ORF1a_T1822I | 1 | 0,2% | 1 |  |  |  | 0,3% | 0 | 0,82 | 0,03 | 20,34 | 0,0% | 0,905 | 0,525 | 1,000 |  |
| sub_ORF1a_G3433R | 1 | 0,2% | 1 |  |  |  | 0,3% | 0 | 0,82 | 0,03 | 20,34 | 0,0% | 0,905 | 0,525 | 1,000 |  |
| sub_ORF1a_S4398L | 1 | 0,2% | 1 |  |  |  | 0,3% | 0 | 0,82 | 0,03 | 20,34 | 0,0% | 0,905 | 0,525 | 1,000 |  |
| sub_ORF1a_A1283V | 1 | 0,2% | 1 |  |  |  | 0,3% | 0 | 0,82 | 0,03 | 20,34 | 0,0% | 0,905 | 0,525 | 1,000 |  |
| sub_ORF8_S103L | 1 | 0,2% | 1 |  |  |  | 0,3% | 0 | 0,82 | 0,03 | 20,34 | 0,0% | 0,905 | 0,525 | 1,000 |  |
| sub_ORF9b_R32L | 1 | 0,2% | 1 |  |  |  | 0,3% | 0 | 0,82 | 0,03 | 20,34 | 0,0% | 0,905 | 0,525 | 1,000 |  |
| sub_S_E471D | 1 | 0,2% | 1 |  |  |  | 0,3% | 0 | 0,82 | 0,03 | 20,34 | 0,0% | 0,905 | 0,525 | 1,000 |  |
| sub_S_S673T | 1 | 0,2% | 1 |  |  |  | 0,3% | 0 | 0,82 | 0,03 | 20,34 | 0,0% | 0,905 | 0,525 | 1,000 |  |
| sub_N_R191L | 1 | 0,2% | 1 |  |  |  | 0,3% | 0 | 0,82 | 0,03 | 20,34 | 0,0% | 0,905 | 0,525 | 1,000 |  |
| sub_ORF7a_G26D | 1 | 0,2% | 1 |  |  |  | 0,3% | 0 | 0,82 | 0,03 | 20,34 | 0,0% | 0,905 | 0,525 | 1,000 |  |
| sub_ORF1a_Q1784R | 1 | 0,2% | 1 |  |  |  | 0,3% | 0 | 0,82 | 0,03 | 20,34 | 0,0% | 0,905 | 0,525 | 1,000 |  |
| sub_ORF1a_S2396G | 1 | 0,2% | 1 |  |  |  | 0,3% | 0 | 0,82 | 0,03 | 20,34 | 0,0% | 0,905 | 0,525 | 1,000 |  |
| sub_N_A359S | 1 | 0,2% | 1 |  |  |  | 0,3% | 0 | 0,82 | 0,03 | 20,34 | 0,0% | 0,905 | 0,525 | 1,000 |  |
| sub_ORF1a_N1458T | 1 | 0,2% | 1 |  |  |  | 0,3% | 0 | 0,82 | 0,03 | 20,34 | 0,0% | 0,905 | 0,525 | 1,000 |  |
| sub_ORF1a_L1459F | 1 | 0,2% | 1 |  |  |  | 0,3% | 0 | 0,82 | 0,03 | 20,34 | 0,0% | 0,905 | 0,525 | 1,000 |  |
| sub_ORF1a_T2872S | 1 | 0,2% | 1 |  |  |  | 0,3% | 0 | 0,82 | 0,03 | 20,34 | 0,0% | 0,905 | 0,525 | 1,000 |  |
| sub_ORF1b_H1712P | 1 | 0,2% | 1 |  |  |  | 0,3% | 0 | 0,82 | 0,03 | 20,34 | 0,0% | 0,905 | 0,525 | 1,000 |  |
| sub_ORF7a_F46V | 1 | 0,2% | 1 |  |  |  | 0,3% | 0 | 0,82 | 0,03 | 20,34 | 0,0% | 0,905 | 0,525 | 1,000 |  |
| sub_ORF1a_S2493I | 1 | 0,2% | 1 |  |  |  | 0,3% | 0 | 0,82 | 0,03 | 20,34 | 0,0% | 0,905 | 0,525 | 1,000 |  |
| sub_ORF1a_S2132I | 1 | 0,2% | 1 |  |  |  | 0,3% | 0 | 0,82 | 0,03 | 20,34 | 0,0% | 0,905 | 0,525 | 1,000 |  |
| sub_ORF1a_T2283I | 1 | 0,2% | 1 |  |  |  | 0,3% | 0 | 0,82 | 0,03 | 20,34 | 0,0% | 0,905 | 0,525 | 1,000 |  |
| sub_ORF7b_F28L | 1 | 0,2% | 1 |  |  |  | 0,3% | 0 | 0,82 | 0,03 | 20,34 | 0,0% | 0,905 | 0,525 | 1,000 |  |
| sub_ORF1a_P1497S | 1 | 0,2% | 1 |  |  |  | 0,3% | 0 | 0,82 | 0,03 | 20,34 | 0,0% | 0,905 | 0,525 | 1,000 |  |
| sub_ORF1a_L3591F | 1 | 0,2% | 1 |  |  |  | 0,3% | 0 | 0,82 | 0,03 | 20,34 | 0,0% | 0,905 | 0,525 | 1,000 |  |
| sub_ORF1a_I652V | 1 | 0,2% | 1 |  |  |  | 0,3% | 0 | 0,82 | 0,03 | 20,34 | 0,0% | 0,905 | 0,525 | 1,000 |  |
| sub_ORF1b_G99V | 1 | 0,2% | 1 |  |  |  | 0,3% | 0 | 0,82 | 0,03 | 20,34 | 0,0% | 0,905 | 0,525 | 1,000 |  |
| sub_ORF1a_E4097G | 1 | 0,2% | 1 |  |  |  | 0,3% | 0 | 0,82 | 0,03 | 20,34 | 0,0% | 0,905 | 0,525 | 1,000 |  |
| sub_ORF1b_S1408L | 1 | 0,2% | 1 |  |  |  | 0,3% | 0 | 0,82 | 0,03 | 20,34 | 0,0% | 0,905 | 0,525 | 1,000 |  |
| sub_S_A243T | 1 | 0,2% | 1 |  |  |  | 0,3% | 0 | 0,82 | 0,03 | 20,34 | 0,0% | 0,905 | 0,525 | 1,000 |  |
| sub_S_A522T | 1 | 0,2% | 1 |  |  |  | 0,3% | 0 | 0,82 | 0,03 | 20,34 | 0,0% | 0,905 | 0,525 | 1,000 |  |
| sub_ORF3a_T175I | 1 | 0,2% | 1 |  |  |  | 0,3% | 0 | 0,82 | 0,03 | 20,34 | 0,0% | 0,905 | 0,525 | 1,000 |  |
| sub_N_Q43V | 1 | 0,2% | 1 |  |  |  | 0,3% | 0 | 0,82 | 0,03 | 20,34 | 0,0% | 0,905 | 0,525 | 1,000 |  |
| sub_N_N192Y | 1 | 0,2% | 1 |  |  |  | 0,3% | 0 | 0,82 | 0,03 | 20,34 | 0,0% | 0,905 | 0,525 | 1,000 |  |
| sub_N_P199T | 1 | 0,2% | 1 |  |  |  | 0,3% | 0 | 0,82 | 0,03 | 20,34 | 0,0% | 0,905 | 0,525 | 1,000 |  |
| sub_ORF1a_T2021I | 1 | 0,2% | 1 |  |  |  | 0,3% | 0 | 0,82 | 0,03 | 20,34 | 0,0% | 0,905 | 0,525 | 1,000 |  |
| sub_ORF1a_F2780L | 1 | 0,2% | 1 |  |  |  | 0,3% | 0 | 0,82 | 0,03 | 20,34 | 0,0% | 0,905 | 0,525 | 1,000 |  |
| sub_ORF1b_R276G | 1 | 0,2% | 1 |  |  |  | 0,3% | 0 | 0,82 | 0,03 | 20,34 | 0,0% | 0,905 | 0,525 | 1,000 |  |
| sub_ORF1b_Q1965L | 1 | 0,2% | 1 |  |  |  | 0,3% | 0 | 0,82 | 0,03 | 20,34 | 0,0% | 0,905 | 0,525 | 1,000 |  |
| sub_ORF3a_L15F | 1 | 0,2% | 1 |  |  |  | 0,3% | 0 | 0,82 | 0,03 | 20,34 | 0,0% | 0,905 | 0,525 | 1,000 |  |
| sub_ORF3a_A23S | 1 | 0,2% | 1 |  |  |  | 0,3% | 0 | 0,82 | 0,03 | 20,34 | 0,0% | 0,905 | 0,525 | 1,000 |  |
| sub_ORF9b_K40 | 1 | 0,2% | 1 |  |  |  | 0,3% | 0 | 0,82 | 0,03 | 20,34 | 0,0% | 0,905 | 0,525 | 1,000 |  |
| sub_ORF1a_S2022P | 1 | 0,2% | 1 |  |  |  | 0,3% | 0 | 0,82 | 0,03 | 20,34 | 0,0% | 0,905 | 0,525 | 1,000 |  |
| sub_ORF1a_K2555R | 1 | 0,2% | 1 |  |  |  | 0,3% | 0 | 0,82 | 0,03 | 20,34 | 0,0% | 0,905 | 0,525 | 1,000 |  |
| sub_ORF1a_E3764G | 1 | 0,2% | 1 |  |  |  | 0,3% | 0 | 0,82 | 0,03 | 20,34 | 0,0% | 0,905 | 0,525 | 1,000 |  |
| sub_ORF3a_Q57R | 1 | 0,2% | 1 |  |  |  | 0,3% | 0 | 0,82 | 0,03 | 20,34 | 0,0% | 0,905 | 0,525 | 1,000 |  |
| sub_N_Q389H | 1 | 0,2% | 1 |  |  |  | 0,3% | 0 | 0,82 | 0,03 | 20,34 | 0,0% | 0,905 | 0,525 | 1,000 |  |
| sub_ORF6_M58I | 1 | 0,2% | 1 |  |  |  | 0,3% | 0 | 0,82 | 0,03 | 20,34 | 0,0% | 0,905 | 0,525 | 1,000 |  |
| sub_ORF1a_C1833R | 1 | 0,2% | 1 |  |  |  | 0,3% | 0 | 0,82 | 0,03 | 20,34 | 0,0% | 0,905 | 0,525 | 1,000 |  |
| sub_ORF1a_I1274V | 1 | 0,2% | 1 |  |  |  | 0,3% | 0 | 0,82 | 0,03 | 20,34 | 0,0% | 0,905 | 0,525 | 1,000 |  |
| sub_ORF1a_I2278V | 1 | 0,2% | 1 |  |  |  | 0,3% | 0 | 0,82 | 0,03 | 20,34 | 0,0% | 0,905 | 0,525 | 1,000 |  |
| sub_ORF3a_P104L | 1 | 0,2% | 1 |  |  |  | 0,3% | 0 | 0,82 | 0,03 | 20,34 | 0,0% | 0,905 | 0,525 | 1,000 |  |
| sub_S_N751K | 1 | 0,2% | 1 |  |  |  | 0,3% | 0 | 0,82 | 0,03 | 20,34 | 0,0% | 0,905 | 0,525 | 1,000 |  |
| sub_ORF1b_V345L | 1 | 0,2% | 1 |  |  |  | 0,3% | 0 | 0,82 | 0,03 | 20,34 | 0,0% | 0,905 | 0,525 | 1,000 |  |
| ins__10609__T | 1 | 0,2% | 1 |  |  |  | 0,3% | 0 | 0,82 | 0,03 | 20,34 | 0,0% | 0,905 | 0,525 | 1,000 |  |
| sub_ORF1b_A2513V | 1 | 0,2% | 1 |  |  |  | 0,3% | 0 | 0,82 | 0,03 | 20,34 | 0,0% | 0,905 | 0,525 | 1,000 |  |
| sub_S_P812S | 1 | 0,2% | 1 |  |  |  | 0,3% | 0 | 0,82 | 0,03 | 20,34 | 0,0% | 0,905 | 0,525 | 1,000 |  |
| sub_S_K300M | 1 | 0,2% | 1 |  |  |  | 0,3% | 0 | 0,82 | 0,03 | 20,34 | 0,0% | 0,905 | 0,525 | 1,000 |  |
| sub_ORF1a_T2777I | 1 | 0,2% | 1 |  |  |  | 0,3% | 0 | 0,82 | 0,03 | 20,34 | 0,0% | 0,905 | 0,525 | 1,000 |  |
| sub_ORF1a_K4176R | 1 | 0,2% | 1 |  |  |  | 0,3% | 0 | 0,82 | 0,03 | 20,34 | 0,0% | 0,905 | 0,525 | 1,000 |  |
| sub_S_C488S | 1 | 0,2% | 1 |  |  |  | 0,3% | 0 | 0,82 | 0,03 | 20,34 | 0,0% | 0,905 | 0,525 | 1,000 |  |
| sub_ORF1a_S2352N | 1 | 0,2% | 1 |  |  |  | 0,3% | 0 | 0,82 | 0,03 | 20,34 | 0,0% | 0,905 | 0,525 | 1,000 |  |
| sub_ORF1b_D100Y | 1 | 0,2% | 1 |  |  |  | 0,3% | 0 | 0,82 | 0,03 | 20,34 | 0,0% | 0,905 | 0,525 | 1,000 |  |
| del_ORF1b_V1811m | 1 | 0,2% | 1 |  |  |  | 0,3% | 0 | 0,82 | 0,03 | 20,34 | 0,0% | 0,905 | 0,525 | 1,000 |  |
| sub_N_E118D | 1 | 0,2% | 1 |  |  |  | 0,3% | 0 | 0,82 | 0,03 | 20,34 | 0,0% | 0,905 | 0,525 | 1,000 |  |
| sub_S_N61H | 1 | 0,2% | 1 |  |  |  | 0,3% | 0 | 0,82 | 0,03 | 20,34 | 0,0% | 0,905 | 0,525 | 1,000 |  |
| sub_ORF6_S25P | 1 | 0,2% | 1 |  |  |  | 0,3% | 0 | 0,82 | 0,03 | 20,34 | 0,0% | 0,905 | 0,525 | 1,000 |  |
| sub_ORF7a_S81L | 1 | 0,2% | 1 |  |  |  | 0,3% | 0 | 0,82 | 0,03 | 20,34 | 0,0% | 0,905 | 0,525 | 1,000 |  |
| ins__27865__AATTGGGTAGTC | | 1 | 0,2% | 1 |  |  |  | 0,3% | 0 | 0,82 | 0,03 | 20,34 | 0,0% | 0,905 | 0,525 | 1,000 |
| sub_ORF1a_E2946D | 1 | 0,2% | 1 |  |  |  | 0,3% | 0 | 0,82 | 0,03 | 20,34 | 0,0% | 0,905 | 0,525 | 1,000 |  |
| sub_S_A892V | 1 | 0,2% | 1 |  |  |  | 0,3% | 0 | 0,82 | 0,03 | 20,34 | 0,0% | 0,905 | 0,525 | 1,000 |  |
| sub_ORF1a_P153S | 1 | 0,2% | 1 |  |  |  | 0,3% | 0 | 0,82 | 0,03 | 20,34 | 0,0% | 0,905 | 0,525 | 1,000 |  |
| sub_ORF1a_P3613L | 1 | 0,2% | 1 |  |  |  | 0,3% | 0 | 0,82 | 0,03 | 20,34 | 0,0% | 0,905 | 0,525 | 1,000 |  |
| sub_ORF1a_R3802C | 1 | 0,2% | 1 |  |  |  | 0,3% | 0 | 0,82 | 0,03 | 20,34 | 0,0% | 0,905 | 0,525 | 1,000 |  |
| sub_ORF1a_G894S | 1 | 0,2% | 1 |  |  |  | 0,3% | 0 | 0,82 | 0,03 | 20,34 | 0,0% | 0,905 | 0,525 | 1,000 |  |
| sub_ORF1a_S3244L | 1 | 0,2% | 1 |  |  |  | 0,3% | 0 | 0,82 | 0,03 | 20,34 | 0,0% | 0,905 | 0,525 | 1,000 |  |
| sub_S_T20I | 1 | 0,2% | 1 |  |  |  | 0,3% | 0 | 0,82 | 0,03 | 20,34 | 0,0% | 0,905 | 0,525 | 1,000 |  |
| sub_ORF1a_M1312T | 1 | 0,2% | 1 |  |  |  | 0,3% | 0 | 0,82 | 0,03 | 20,34 | 0,0% | 0,905 | 0,525 | 1,000 |  |
| sub_ORF1a_I2231S | 1 | 0,2% | 1 |  |  |  | 0,3% | 0 | 0,82 | 0,03 | 20,34 | 0,0% | 0,905 | 0,525 | 1,000 |  |
| sub_N_Q239H | 1 | 0,2% | 1 |  |  |  | 0,3% | 0 | 0,82 | 0,03 | 20,34 | 0,0% | 0,905 | 0,525 | 1,000 |  |
| sub_ORF1a_S2242F | 1 | 0,2% | 1 |  |  |  | 0,3% | 0 | 0,82 | 0,03 | 20,34 | 0,0% | 0,905 | 0,525 | 1,000 |  |
| sub_ORF1a_N3466T | 1 | 0,2% | 1 |  |  |  | 0,3% | 0 | 0,82 | 0,03 | 20,34 | 0,0% | 0,905 | 0,525 | 1,000 |  |
| sub_ORF1a_H83R | 1 | 0,2% | 1 |  |  |  | 0,3% | 0 | 0,82 | 0,03 | 20,34 | 0,0% | 0,905 | 0,525 | 1,000 |  |
| sub_ORF1a_T1840I | 1 | 0,2% | 1 |  |  |  | 0,3% | 0 | 0,82 | 0,03 | 20,34 | 0,0% | 0,905 | 0,525 | 1,000 |  |
| sub_S_A831V | 1 | 0,2% | 1 |  |  |  | 0,3% | 0 | 0,82 | 0,03 | 20,34 | 0,0% | 0,905 | 0,525 | 1,000 |  |
| sub_ORF1b_T792I | 1 | 0,2% | 1 |  |  |  | 0,3% | 0 | 0,82 | 0,03 | 20,34 | 0,0% | 0,905 | 0,525 | 1,000 |  |
| sub_ORF1a_G1451V | 1 | 0,2% | 1 |  |  |  | 0,3% | 0 | 0,82 | 0,03 | 20,34 | 0,0% | 0,905 | 0,525 | 1,000 |  |
| sub_ORF1a_E4210 | 1 | 0,2% | 1 |  |  |  | 0,3% | 0 | 0,82 | 0,03 | 20,34 | 0,0% | 0,905 | 0,525 | 1,000 |  |
| sub_S_C136F | 1 | 0,2% | 1 |  |  |  | 0,3% | 0 | 0,82 | 0,03 | 20,34 | 0,0% | 0,905 | 0,525 | 1,000 |  |
| sub_N_D103G | 1 | 0,2% | 1 |  |  |  | 0,3% | 0 | 0,82 | 0,03 | 20,34 | 0,0% | 0,905 | 0,525 | 1,000 |  |
| sub_ORF1a_T3555A | 1 | 0,2% | 1 |  |  |  | 0,3% | 0 | 0,82 | 0,03 | 20,34 | 0,0% | 0,905 | 0,525 | 1,000 |  |
| sub_ORF1a_T2632I | 1 | 0,2% | 1 |  |  |  | 0,3% | 0 | 0,82 | 0,03 | 20,34 | 0,0% | 0,905 | 0,525 | 1,000 |  |
| sub_ORF1a_T1881N | 1 | 0,2% | 1 |  |  |  | 0,3% | 0 | 0,82 | 0,03 | 20,34 | 0,0% | 0,905 | 0,525 | 1,000 |  |
| ins__29600__TA | 1 | 0,2% | 1 |  |  |  | 0,3% | 0 | 0,82 | 0,03 | 20,34 | 0,0% | 0,905 | 0,525 | 1,000 |  |
| sub_S_P479S | 1 | 0,2% | 1 |  |  |  | 0,3% | 0 | 0,82 | 0,03 | 20,34 | 0,0% | 0,905 | 0,525 | 1,000 |  |
| sub_S_L8F | 1 | 0,2% | 1 |  |  |  | 0,3% | 0 | 0,82 | 0,03 | 20,34 | 0,0% | 0,905 | 0,525 | 1,000 |  |
| sub_ORF1a_E2904G | 1 | 0,2% | 1 |  |  |  | 0,3% | 0 | 0,82 | 0,03 | 20,34 | 0,0% | 0,905 | 0,525 | 1,000 |  |
| sub_N_T366I | 1 | 0,2% | 1 |  |  |  | 0,3% | 0 | 0,82 | 0,03 | 20,34 | 0,0% | 0,905 | 0,525 | 1,000 |  |
| sub_ORF1a_E754K | 1 | 0,2% | 1 |  |  |  | 0,3% | 0 | 0,82 | 0,03 | 20,34 | 0,0% | 0,905 | 0,525 | 1,000 |  |
| sub_ORF1a_D762V | 1 | 0,2% | 1 |  |  |  | 0,3% | 0 | 0,82 | 0,03 | 20,34 | 0,0% | 0,905 | 0,525 | 1,000 |  |
| sub_ORF1a_A2944V | 1 | 0,2% | 1 |  |  |  | 0,3% | 0 | 0,82 | 0,03 | 20,34 | 0,0% | 0,905 | 0,525 | 1,000 |  |
| sub_S_G476C | 1 | 0,2% | 1 |  |  |  | 0,3% | 0 | 0,82 | 0,03 | 20,34 | 0,0% | 0,905 | 0,525 | 1,000 |  |
| sub_ORF1a_Q3961K | 1 | 0,2% | 1 |  |  |  | 0,3% | 0 | 0,82 | 0,03 | 20,34 | 0,0% | 0,905 | 0,525 | 1,000 |  |
| sub_ORF1a_P4120L | 1 | 0,2% | 1 |  |  |  | 0,3% | 0 | 0,82 | 0,03 | 20,34 | 0,0% | 0,905 | 0,525 | 1,000 |  |
| sub_ORF1a_K58R | 1 | 0,2% | 1 |  |  |  | 0,3% | 0 | 0,82 | 0,03 | 20,34 | 0,0% | 0,905 | 0,525 | 1,000 |  |
| sub_ORF1b_R1608C | 1 | 0,2% | 1 |  |  |  | 0,3% | 0 | 0,82 | 0,03 | 20,34 | 0,0% | 0,905 | 0,525 | 1,000 |  |
| sub_S_M731I | 1 | 0,2% | 1 |  |  |  | 0,3% | 0 | 0,82 | 0,03 | 20,34 | 0,0% | 0,905 | 0,525 | 1,000 |  |
| sub_ORF1b_A1662V | 1 | 0,2% | 1 |  |  |  | 0,3% | 0 | 0,82 | 0,03 | 20,34 | 0,0% | 0,905 | 0,525 | 1,000 |  |
| sub_ORF1a_V3721F | 1 | 0,2% | 1 |  |  |  | 0,3% | 0 | 0,82 | 0,03 | 20,34 | 0,0% | 0,905 | 0,525 | 1,000 |  |
| sub_ORF1a_P3767L | 1 | 0,2% | 1 |  |  |  | 0,3% | 0 | 0,82 | 0,03 | 20,34 | 0,0% | 0,905 | 0,525 | 1,000 |  |
| sub_ORF1a_D3936N | 1 | 0,2% | 1 |  |  |  | 0,3% | 0 | 0,82 | 0,03 | 20,34 | 0,0% | 0,905 | 0,525 | 1,000 |  |
| sub_ORF3a_R134C | 1 | 0,2% | 1 |  |  |  | 0,3% | 0 | 0,82 | 0,03 | 20,34 | 0,0% | 0,905 | 0,525 | 1,000 |  |
| sub_ORF7a_F46C | 1 | 0,2% | 1 |  |  |  | 0,3% | 0 | 0,82 | 0,03 | 20,34 | 0,0% | 0,905 | 0,525 | 1,000 |  |
| sub_ORF7b_C12G | 1 | 0,2% | 1 |  |  |  | 0,3% | 0 | 0,82 | 0,03 | 20,34 | 0,0% | 0,905 | 0,525 | 1,000 |  |
| sub_ORF1a_S887F | 1 | 0,2% | 1 |  |  |  | 0,3% | 0 | 0,82 | 0,03 | 20,34 | 0,0% | 0,905 | 0,525 | 1,000 |  |
| sub_ORF1b_A2132V | 1 | 0,2% | 1 |  |  |  | 0,3% | 0 | 0,82 | 0,03 | 20,34 | 0,0% | 0,905 | 0,525 | 1,000 |  |
| sub_N_D402Y | 1 | 0,2% | 1 |  |  |  | 0,3% | 0 | 0,82 | 0,03 | 20,34 | 0,0% | 0,905 | 0,525 | 1,000 |  |
| sub_ORF1a_S2517F | 1 | 0,2% | 1 |  |  |  | 0,3% | 0 | 0,82 | 0,03 | 20,34 | 0,0% | 0,905 | 0,525 | 1,000 |  |
| sub_ORF1a_G2843V | 1 | 0,2% | 1 |  |  |  | 0,3% | 0 | 0,82 | 0,03 | 20,34 | 0,0% | 0,905 | 0,525 | 1,000 |  |
| sub_ORF1a_Q3893P | 1 | 0,2% | 1 |  |  |  | 0,3% | 0 | 0,82 | 0,03 | 20,34 | 0,0% | 0,905 | 0,525 | 1,000 |  |
| sub_ORF1a_V4361E | 1 | 0,2% | 1 |  |  |  | 0,3% | 0 | 0,82 | 0,03 | 20,34 | 0,0% | 0,905 | 0,525 | 1,000 |  |
| sub_ORF1b_Y277D | 1 | 0,2% | 1 |  |  |  | 0,3% | 0 | 0,82 | 0,03 | 20,34 | 0,0% | 0,905 | 0,525 | 1,000 |  |
| sub_ORF1b_A1547E | 1 | 0,2% | 1 |  |  |  | 0,3% | 0 | 0,82 | 0,03 | 20,34 | 0,0% | 0,905 | 0,525 | 1,000 |  |
| sub_ORF6_P57S | 1 | 0,2% | 1 |  |  |  | 0,3% | 0 | 0,82 | 0,03 | 20,34 | 0,0% | 0,905 | 0,525 | 1,000 |  |
| sub_S_D138H | 1 | 0,2% | 1 |  |  |  | 0,3% | 0 | 0,82 | 0,03 | 20,34 | 0,0% | 0,905 | 0,525 | 1,000 |  |
| sub_ORF1a_A773V | 1 | 0,2% | 1 |  |  |  | 0,3% | 0 | 0,82 | 0,03 | 20,34 | 0,0% | 0,905 | 0,525 | 1,000 |  |
| sub_ORF7b_I27T | 1 | 0,2% | 1 |  |  |  | 0,3% | 0 | 0,82 | 0,03 | 20,34 | 0,0% | 0,905 | 0,525 | 1,000 |  |
| sub_ORF1b_Y1944C | 1 | 0,2% | 1 |  |  |  | 0,3% | 0 | 0,82 | 0,03 | 20,34 | 0,0% | 0,905 | 0,525 | 1,000 |  |
| sub_ORF3a_E266A | 1 | 0,2% | 1 |  |  |  | 0,3% | 0 | 0,82 | 0,03 | 20,34 | 0,0% | 0,905 | 0,525 | 1,000 |  |
| sub_E_V17 | 1 | 0,2% | 1 |  |  |  | 0,3% | 0 | 0,82 | 0,03 | 20,34 | 0,0% | 0,905 | 0,525 | 1,000 |  |
| sub_N_D3V | 1 | 0,2% | 1 |  |  |  | 0,3% | 0 | 0,82 | 0,03 | 20,34 | 0,0% | 0,905 | 0,525 | 1,000 |  |
| sub_N_L219F | 1 | 0,2% | 1 |  |  |  | 0,3% | 0 | 0,82 | 0,03 | 20,34 | 0,0% | 0,905 | 0,525 | 1,000 |  |
| sub_ORF1a_T1241S | 1 | 0,2% | 1 |  |  |  | 0,3% | 0 | 0,82 | 0,03 | 20,34 | 0,0% | 0,905 | 0,525 | 1,000 |  |
| sub_ORF1a_S1272R | 1 | 0,2% | 1 |  |  |  | 0,3% | 0 | 0,82 | 0,03 | 20,34 | 0,0% | 0,905 | 0,525 | 1,000 |  |
| sub_ORF1a_K1655T | 1 | 0,2% | 1 |  |  |  | 0,3% | 0 | 0,82 | 0,03 | 20,34 | 0,0% | 0,905 | 0,525 | 1,000 |  |
| sub_ORF1a_K2143E | 1 | 0,2% | 1 |  |  |  | 0,3% | 0 | 0,82 | 0,03 | 20,34 | 0,0% | 0,905 | 0,525 | 1,000 |  |
| sub_ORF1a_A3270V | 1 | 0,2% | 1 |  |  |  | 0,3% | 0 | 0,82 | 0,03 | 20,34 | 0,0% | 0,905 | 0,525 | 1,000 |  |
| sub_ORF1a_F3271L | 1 | 0,2% | 1 |  |  |  | 0,3% | 0 | 0,82 | 0,03 | 20,34 | 0,0% | 0,905 | 0,525 | 1,000 |  |
| sub_ORF1a_Q3859K | 1 | 0,2% | 1 |  |  |  | 0,3% | 0 | 0,82 | 0,03 | 20,34 | 0,0% | 0,905 | 0,525 | 1,000 |  |
| sub_ORF1b_Y78 | 1 | 0,2% | 1 |  |  |  | 0,3% | 0 | 0,82 | 0,03 | 20,34 | 0,0% | 0,905 | 0,525 | 1,000 |  |
| sub_S_A956V | 1 | 0,2% | 1 |  |  |  | 0,3% | 0 | 0,82 | 0,03 | 20,34 | 0,0% | 0,905 | 0,525 | 1,000 |  |
| sub_S_Y1047 | 1 | 0,2% | 1 |  |  |  | 0,3% | 0 | 0,82 | 0,03 | 20,34 | 0,0% | 0,905 | 0,525 | 1,000 |  |
| sub_ORF1a_D335N | 1 | 0,2% | 1 |  |  |  | 0,3% | 0 | 0,82 | 0,03 | 20,34 | 0,0% | 0,905 | 0,525 | 1,000 |  |
| sub_ORF1a_T4311A | 1 | 0,2% | 1 |  |  |  | 0,3% | 0 | 0,82 | 0,03 | 20,34 | 0,0% | 0,905 | 0,525 | 1,000 |  |
| sub_ORF1b_M1586I | 1 | 0,2% | 1 |  |  |  | 0,3% | 0 | 0,82 | 0,03 | 20,34 | 0,0% | 0,905 | 0,525 | 1,000 |  |
| sub_S_G257D | 1 | 0,2% | 1 |  |  |  | 0,3% | 0 | 0,82 | 0,03 | 20,34 | 0,0% | 0,905 | 0,525 | 1,000 |  |
| sub_ORF1a_S428N | 1 | 0,2% | 1 |  |  |  | 0,3% | 0 | 0,82 | 0,03 | 20,34 | 0,0% | 0,905 | 0,525 | 1,000 |  |
| sub_ORF7b_A43V | 1 | 0,2% | 1 |  |  |  | 0,3% | 0 | 0,82 | 0,03 | 20,34 | 0,0% | 0,905 | 0,525 | 1,000 |  |
| sub_ORF1a_T4355I | 1 | 0,2% | 1 |  |  |  | 0,3% | 0 | 0,82 | 0,03 | 20,34 | 0,0% | 0,905 | 0,525 | 1,000 |  |
| sub_N_P46S | 1 | 0,2% | 1 |  |  |  | 0,3% | 0 | 0,82 | 0,03 | 20,34 | 0,0% | 0,905 | 0,525 | 1,000 |  |
| sub_ORF1b_T595N | 1 | 0,2% | 1 |  |  |  | 0,3% | 0 | 0,82 | 0,03 | 20,34 | 0,0% | 0,905 | 0,525 | 1,000 |  |
| sub_S_D80Y | 1 | 0,2% | 1 |  |  |  | 0,3% | 0 | 0,82 | 0,03 | 20,34 | 0,0% | 0,905 | 0,525 | 1,000 |  |
| sub_S_T1238I | 1 | 0,2% | 1 |  |  |  | 0,3% | 0 | 0,82 | 0,03 | 20,34 | 0,0% | 0,905 | 0,525 | 1,000 |  |
| sub_M_V70L | 1 | 0,2% | 1 |  |  |  | 0,3% | 0 | 0,82 | 0,03 | 20,34 | 0,0% | 0,905 | 0,525 | 1,000 |  |
| sub_N_D3Q | 1 | 0,2% | 1 |  |  |  | 0,3% | 0 | 0,82 | 0,03 | 20,34 | 0,0% | 0,905 | 0,525 | 1,000 |  |
| sub_ORF1b_I162V | 1 | 0,2% | 1 |  |  |  | 0,3% | 0 | 0,82 | 0,03 | 20,34 | 0,0% | 0,905 | 0,525 | 1,000 |  |
| sub_ORF1b_Y2608N | 1 | 0,2% | 1 |  |  |  | 0,3% | 0 | 0,82 | 0,03 | 20,34 | 0,0% | 0,905 | 0,525 | 1,000 |  |
| sub_M_T208I | 1 | 0,2% | 1 |  |  |  | 0,3% | 0 | 0,82 | 0,03 | 20,34 | 0,0% | 0,905 | 0,525 | 1,000 |  |
| sub_S_G496S | 1 | 0,2% | 1 |  |  |  | 0,3% | 0 | 0,82 | 0,03 | 20,34 | 0,0% | 0,905 | 0,525 | 1,000 |  |
| sub_ORF1a_N126S | 1 | 0,2% | 1 |  |  |  | 0,3% | 0 | 0,82 | 0,03 | 20,34 | 0,0% | 0,905 | 0,525 | 1,000 |  |
| sub_S_I909V | 1 | 0,2% | 1 |  |  |  | 0,3% | 0 | 0,82 | 0,03 | 20,34 | 0,0% | 0,905 | 0,525 | 1,000 |  |
| sub_ORF1b_E885D | 1 | 0,2% | 1 |  |  |  | 0,3% | 0 | 0,82 | 0,03 | 20,34 | 0,0% | 0,905 | 0,525 | 1,000 |  |
| sub_ORF1a_P271L | 1 | 0,2% | 1 |  |  |  | 0,3% | 0 | 0,82 | 0,03 | 20,34 | 0,0% | 0,905 | 0,525 | 1,000 |  |
| sub_ORF1b_F1891V | 1 | 0,2% | 1 |  |  |  | 0,3% | 0 | 0,82 | 0,03 | 20,34 | 0,0% | 0,905 | 0,525 | 1,000 |  |
| sub_ORF1a_A801V | 1 | 0,2% | 1 |  |  |  | 0,3% | 0 | 0,82 | 0,03 | 20,34 | 0,0% | 0,905 | 0,525 | 1,000 |  |
| sub_ORF7a_P84R | 1 | 0,2% | 1 |  |  |  | 0,3% | 0 | 0,82 | 0,03 | 20,34 | 0,0% | 0,905 | 0,525 | 1,000 |  |
| sub_ORF1a_T2800I | 1 | 0,2% | 1 |  |  |  | 0,3% | 0 | 0,82 | 0,03 | 20,34 | 0,0% | 0,905 | 0,525 | 1,000 |  |
| sub_ORF9b_T60I | 1 | 0,2% | 1 |  |  |  | 0,3% | 0 | 0,82 | 0,03 | 20,34 | 0,0% | 0,905 | 0,525 | 1,000 |  |
| sub_S_A706V | 1 | 0,2% | 1 |  |  |  | 0,3% | 0 | 0,82 | 0,03 | 20,34 | 0,0% | 0,905 | 0,525 | 1,000 |  |
| sub_ORF1a_Y2266N | 1 | 0,2% | 1 |  |  |  | 0,3% | 0 | 0,82 | 0,03 | 20,34 | 0,0% | 0,905 | 0,525 | 1,000 |  |
| sub_ORF1b_H2571Y | 1 | 0,2% | 1 |  |  |  | 0,3% | 0 | 0,82 | 0,03 | 20,34 | 0,0% | 0,905 | 0,525 | 1,000 |  |
| sub_ORF1a_A2587V | 1 | 0,2% | 1 |  |  |  | 0,3% | 0 | 0,82 | 0,03 | 20,34 | 0,0% | 0,905 | 0,525 | 1,000 |  |
| sub_ORF1a_S3001R | 1 | 0,2% | 1 |  |  |  | 0,3% | 0 | 0,82 | 0,03 | 20,34 | 0,0% | 0,905 | 0,525 | 1,000 |  |
| sub_ORF1a_F3018L | 1 | 0,2% | 1 |  |  |  | 0,3% | 0 | 0,82 | 0,03 | 20,34 | 0,0% | 0,905 | 0,525 | 1,000 |  |
| sub_ORF1a_L3796F | 1 | 0,2% | 1 |  |  |  | 0,3% | 0 | 0,82 | 0,03 | 20,34 | 0,0% | 0,905 | 0,525 | 1,000 |  |
| sub_ORF1b_E171G | 1 | 0,2% | 1 |  |  |  | 0,3% | 0 | 0,82 | 0,03 | 20,34 | 0,0% | 0,905 | 0,525 | 1,000 |  |
| sub_ORF1b_N2695H | 1 | 0,2% | 1 |  |  |  | 0,3% | 0 | 0,82 | 0,03 | 20,34 | 0,0% | 0,905 | 0,525 | 1,000 |  |
| sub_ORF1a_A690V | 1 | 0,2% | 1 |  |  |  | 0,3% | 0 | 0,82 | 0,03 | 20,34 | 0,0% | 0,905 | 0,525 | 1,000 |  |
| sub_N_N140D | 1 | 0,2% | 1 |  |  |  | 0,3% | 0 | 0,82 | 0,03 | 20,34 | 0,0% | 0,905 | 0,525 | 1,000 |  |
| sub_N_V392L | 1 | 0,2% | 1 |  |  |  | 0,3% | 0 | 0,82 | 0,03 | 20,34 | 0,0% | 0,905 | 0,525 | 1,000 |  |
| sub_ORF9b_P3L | 1 | 0,2% | 1 |  |  |  | 0,3% | 0 | 0,82 | 0,03 | 20,34 | 0,0% | 0,905 | 0,525 | 1,000 |  |
| sub_ORF1a_P885T | 1 | 0,2% | 1 |  |  |  | 0,3% | 0 | 0,82 | 0,03 | 20,34 | 0,0% | 0,905 | 0,525 | 1,000 |  |
| sub_ORF1b_A2131V | 1 | 0,2% | 1 |  |  |  | 0,3% | 0 | 0,82 | 0,03 | 20,34 | 0,0% | 0,905 | 0,525 | 1,000 |  |
| sub_ORF3a_K67N | 1 | 0,2% | 1 |  |  |  | 0,3% | 0 | 0,82 | 0,03 | 20,34 | 0,0% | 0,905 | 0,525 | 1,000 |  |
| sub_ORF6_S41P | 1 | 0,2% | 1 |  |  |  | 0,3% | 0 | 0,82 | 0,03 | 20,34 | 0,0% | 0,905 | 0,525 | 1,000 |  |
| sub_ORF1a_V1393M | 1 | 0,2% | 1 |  |  |  | 0,3% | 0 | 0,82 | 0,03 | 20,34 | 0,0% | 0,905 | 0,525 | 1,000 |  |
| sub_ORF1a_T609I | 1 | 0,2% | 1 |  |  |  | 0,3% | 0 | 0,82 | 0,03 | 20,34 | 0,0% | 0,905 | 0,525 | 1,000 |  |
| sub_ORF7b_H42Y | 1 | 0,2% | 1 |  |  |  | 0,3% | 0 | 0,82 | 0,03 | 20,34 | 0,0% | 0,905 | 0,525 | 1,000 |  |
| sub_ORF9b_V92A | 1 | 0,2% | 1 |  |  |  | 0,3% | 0 | 0,82 | 0,03 | 20,34 | 0,0% | 0,905 | 0,525 | 1,000 |  |
| sub_ORF1a_N1172S | 1 | 0,2% | 1 |  |  |  | 0,3% | 0 | 0,82 | 0,03 | 20,34 | 0,0% | 0,905 | 0,525 | 1,000 |  |
| sub_ORF3a_N257X | 1 | 0,2% | 1 |  |  |  | 0,3% | 0 | 0,82 | 0,03 | 20,34 | 0,0% | 0,905 | 0,525 | 1,000 |  |
| del_ORF3a_V256m | 1 | 0,2% | 1 |  |  |  | 0,3% | 0 | 0,82 | 0,03 | 20,34 | 0,0% | 0,905 | 0,525 | 1,000 |  |
| sub_ORF1a_T1250A | 1 | 0,2% | 1 |  |  |  | 0,3% | 0 | 0,82 | 0,03 | 20,34 | 0,0% | 0,905 | 0,525 | 1,000 |  |
| sub_ORF1b_V2223L | 1 | 0,2% | 1 |  |  |  | 0,3% | 0 | 0,82 | 0,03 | 20,34 | 0,0% | 0,905 | 0,525 | 1,000 |  |
| sub_ORF1a_D3526N | 1 | 0,2% | 1 |  |  |  | 0,3% | 0 | 0,82 | 0,03 | 20,34 | 0,0% | 0,905 | 0,525 | 1,000 |  |
| sub_S_A1070V | 1 | 0,2% | 1 |  |  |  | 0,3% | 0 | 0,82 | 0,03 | 20,34 | 0,0% | 0,905 | 0,525 | 1,000 |  |
| del_N_D3m | 1 | 0,2% | 1 |  |  |  | 0,3% | 0 | 0,82 | 0,03 | 20,34 | 0,0% | 0,905 | 0,525 | 1,000 |  |
| del_ORF6_F2m | 1 | 0,2% | 1 |  |  |  | 0,3% | 0 | 0,82 | 0,03 | 20,34 | 0,0% | 0,905 | 0,525 | 1,000 |  |
| sub_M_R131H | 1 | 0,2% | 1 |  |  |  | 0,3% | 0 | 0,82 | 0,03 | 20,34 | 0,0% | 0,905 | 0,525 | 1,000 |  |
| sub_ORF1a_T2093I | 1 | 0,2% | 1 |  |  |  | 0,3% | 0 | 0,82 | 0,03 | 20,34 | 0,0% | 0,905 | 0,525 | 1,000 |  |
| sub_ORF1a_Q2308H | 1 | 0,2% | 1 |  |  |  | 0,3% | 0 | 0,82 | 0,03 | 20,34 | 0,0% | 0,905 | 0,525 | 1,000 |  |
| sub_M_R131P | 1 | 0,2% | 1 |  |  |  | 0,3% | 0 | 0,82 | 0,03 | 20,34 | 0,0% | 0,905 | 0,525 | 1,000 |  |
| sub_ORF1a_G3676S | 14 | 3,4% | 11 |  |  |  | 3,8% | 3 | 0,74 | 0,22 | 2,51 | 2,5% | 0,634 | 0,540 | 0,765 |  |
| sub_S_D614G | 400 | 97,3% | 286 |  |  |  | 97,6% | 114 | 0,67 | 0,20 | 2,19 | 96,6% | 0,503 | 0,570 | 0,520 |  |
| sub_ORF1a_D2980G | 5 | 1,2% | 3 |  |  |  | 1,0% | 2 | 1,78 | 0,35 | 9,16 | 1,7% | 0,490 | 0,575 | 0,628 |  |
| sub_E_V75L | 5 | 1,2% | 3 |  |  |  | 1,0% | 2 | 1,78 | 0,35 | 9,16 | 1,7% | 0,490 | 0,575 | 0,628 |  |
| sub_ORF1a_T1246I | 5 | 1,2% | 3 |  |  |  | 1,0% | 2 | 1,78 | 0,35 | 9,16 | 1,7% | 0,490 | 0,575 | 0,628 |  |
| sub_ORF1a_G3278S | 5 | 1,2% | 3 |  |  |  | 1,0% | 2 | 1,78 | 0,35 | 9,16 | 1,7% | 0,490 | 0,575 | 0,628 |  |
| sub_N_P365S | 5 | 1,2% | 3 |  |  |  | 1,0% | 2 | 1,78 | 0,35 | 9,16 | 1,7% | 0,490 | 0,575 | 0,628 |  |
| sub_ORF3a_T268M | 5 | 1,2% | 3 |  |  |  | 1,0% | 2 | 1,78 | 0,35 | 9,16 | 1,7% | 0,490 | 0,575 | 0,628 |  |
| sub_N_S202N | 8 | 1,9% | 5 |  |  |  | 1,7% | 3 | 1,59 | 0,41 | 6,18 | 2,5% | 0,503 | 0,579 | 0,694 |  |
| sub_S_L452R | 8 | 1,9% | 5 |  |  |  | 1,7% | 3 | 1,59 | 0,41 | 6,18 | 2,5% | 0,503 | 0,579 | 0,694 |  |
| sub_S_V3G | 8 | 1,9% | 5 |  |  |  | 1,7% | 3 | 1,59 | 0,41 | 6,18 | 2,5% | 0,503 | 0,579 | 0,694 |  |
| sub_S_E484K | 25 | 6,1% | 19 |  |  |  | 6,5% | 6 | 0,81 | 0,33 | 2,03 | 5,1% | 0,658 | 0,591 | 0,657 |  |
| sub_N_A220V | 37 | 9,0% | 25 |  |  |  | 8,5% | 12 | 1,24 | 0,61 | 2,52 | 10,2% | 0,560 | 0,600 | 0,574 |  |
| sub_N_R203X | 21 | 5,1% | 16 |  |  |  | 5,5% | 5 | 0,81 | 0,30 | 2,19 | 4,2% | 0,685 | 0,610 | 0,805 |  |
| sub_N_G204X | 21 | 5,1% | 16 |  |  |  | 5,5% | 5 | 0,81 | 0,30 | 2,19 | 4,2% | 0,685 | 0,610 | 0,805 |  |
| sub_S_L18F | 17 | 4,1% | 13 |  |  |  | 4,4% | 4 | 0,82 | 0,27 | 2,43 | 3,4% | 0,715 | 0,630 | 0,788 |  |
| sub_ORF1a_K1655N | 17 | 4,1% | 13 |  |  |  | 4,4% | 4 | 0,82 | 0,27 | 2,43 | 3,4% | 0,715 | 0,630 | 0,788 |  |
| sub_S_S98F | 13 | 3,2% | 10 |  |  |  | 3,4% | 3 | 0,82 | 0,24 | 2,80 | 2,5% | 0,749 | 0,648 | 0,765 |  |
| sub_ORF1a_S3675T | 13 | 3,2% | 10 |  |  |  | 3,4% | 3 | 0,82 | 0,24 | 2,80 | 2,5% | 0,749 | 0,648 | 0,765 |  |
| sub_ORF1a_R24C | 9 | 2,2% | 7 |  |  |  | 2,4% | 2 | 0,82 | 0,19 | 3,49 | 1,7% | 0,788 | 0,664 | 1,000 |  |
| sub_ORF3a_T151I | 5 | 1,2% | 4 |  |  |  | 1,4% | 1 | 0,82 | 0,13 | 5,28 | 0,8% | 0,836 | 0,665 | 1,000 |  |
| sub_ORF1a_T3032I | 5 | 1,2% | 4 |  |  |  | 1,4% | 1 | 0,82 | 0,13 | 5,28 | 0,8% | 0,836 | 0,665 | 1,000 |  |
| sub_ORF1a_L730F | 5 | 1,2% | 4 |  |  |  | 1,4% | 1 | 0,82 | 0,13 | 5,28 | 0,8% | 0,836 | 0,665 | 1,000 |  |
| sub_ORF1b_K1383R | 24 | 5,8% | 18 |  |  |  | 6,1% | 6 | 0,86 | 0,34 | 2,16 | 5,1% | 0,749 | 0,679 | 0,818 |  |
| sub_N_D3X | 96 | 23,4% | 70 |  |  |  | 23,9% | 26 | 0,91 | 0,55 | 1,51 | 22,0% | 0,710 | 0,687 | 0,797 |  |
| sub_S_N501Y | 189 | 46,0% | 133 |  |  |  | 45,4% | 56 | 1,09 | 0,71 | 1,67 | 47,5% | 0,702 | 0,704 | 0,743 |  |
| del_S_A243m | 20 | 4,9% | 15 |  |  |  | 5,1% | 5 | 0,87 | 0,32 | 2,36 | 4,2% | 0,785 | 0,707 | 0,805 |  |
| del_S_L244m | 20 | 4,9% | 15 |  |  |  | 5,1% | 5 | 0,87 | 0,32 | 2,36 | 4,2% | 0,785 | 0,707 | 0,805 |  |
| sub_S_A222V | 35 | 8,5% | 24 |  |  |  | 8,2% | 11 | 1,18 | 0,56 | 2,46 | 9,3% | 0,664 | 0,710 | 0,699 |  |
| sub_N_T205I | 32 | 7,8% | 22 |  |  |  | 7,5% | 10 | 1,17 | 0,54 | 2,51 | 8,5% | 0,691 | 0,741 | 0,839 |  |
| sub_ORF1b_P1975S | 9 | 2,2% | 6 |  |  |  | 2,0% | 3 | 1,34 | 0,36 | 5,00 | 2,5% | 0,663 | 0,757 | 0,720 |  |
| sub_ORF1a_T1567A | 9 | 2,2% | 6 |  |  |  | 2,0% | 3 | 1,34 | 0,36 | 5,00 | 2,5% | 0,663 | 0,757 | 0,720 |  |
| sub_S_H655Y | 6 | 1,5% | 4 |  |  |  | 1,4% | 2 | 1,38 | 0,29 | 6,58 | 1,7% | 0,686 | 0,801 | 1,000 |  |
| sub_ORF7a_T14I | 6 | 1,5% | 4 |  |  |  | 1,4% | 2 | 1,38 | 0,29 | 6,58 | 1,7% | 0,686 | 0,801 | 1,000 |  |
| sub_ORF3a_S171L | 19 | 4,6% | 14 |  |  |  | 4,8% | 5 | 0,93 | 0,34 | 2,55 | 4,2% | 0,894 | 0,813 | 1,000 |  |
| sub_S_D80A | 19 | 4,6% | 14 |  |  |  | 4,8% | 5 | 0,93 | 0,34 | 2,55 | 4,2% | 0,894 | 0,813 | 1,000 |  |
| sub_S_D215G | 19 | 4,6% | 14 |  |  |  | 4,8% | 5 | 0,93 | 0,34 | 2,55 | 4,2% | 0,894 | 0,813 | 1,000 |  |
| sub_S_K417N | 19 | 4,6% | 14 |  |  |  | 4,8% | 5 | 0,93 | 0,34 | 2,55 | 4,2% | 0,894 | 0,813 | 1,000 |  |
| sub_S_A701V | 19 | 4,6% | 14 |  |  |  | 4,8% | 5 | 0,93 | 0,34 | 2,55 | 4,2% | 0,894 | 0,813 | 1,000 |  |
| del_S_A242m | 8 | 1,9% | 6 |  |  |  | 2,0% | 2 | 0,95 | 0,22 | 4,15 | 1,7% | 0,945 | 0,815 | 1,000 |  |
| sub_N_M1W | 8 | 1,9% | 6 |  |  |  | 2,0% | 2 | 0,95 | 0,22 | 4,15 | 1,7% | 0,945 | 0,815 | 1,000 |  |
| sub_S_L5F | 16 | 3,9% | 11 |  |  |  | 3,8% | 5 | 1,19 | 0,42 | 3,37 | 4,2% | 0,742 | 0,819 | 0,783 |  |
| sub_ORF8_I121L | 3 | 0,7% | 2 |  |  |  | 0,7% | 1 | 1,49 | 0,19 | 11,40 | 0,8% | 0,702 | 0,859 | 1,000 |  |
| sub_N_S187L | 3 | 0,7% | 2 |  |  |  | 0,7% | 1 | 1,49 | 0,19 | 11,40 | 0,8% | 0,702 | 0,859 | 1,000 |  |
| sub_ORF3a_T223I | 3 | 0,7% | 2 |  |  |  | 0,7% | 1 | 1,49 | 0,19 | 11,40 | 0,8% | 0,702 | 0,859 | 1,000 |  |
| sub_ORF1a_T3058I | 3 | 0,7% | 2 |  |  |  | 0,7% | 1 | 1,49 | 0,19 | 11,40 | 0,8% | 0,702 | 0,859 | 1,000 |  |
| sub_S_P1263L | 3 | 0,7% | 2 |  |  |  | 0,7% | 1 | 1,49 | 0,19 | 11,40 | 0,8% | 0,702 | 0,859 | 1,000 |  |
| sub_N_S193I | 3 | 0,7% | 2 |  |  |  | 0,7% | 1 | 1,49 | 0,19 | 11,40 | 0,8% | 0,702 | 0,859 | 1,000 |  |
| sub_ORF1a_P959S | 3 | 0,7% | 2 |  |  |  | 0,7% | 1 | 1,49 | 0,19 | 11,40 | 0,8% | 0,702 | 0,859 | 1,000 |  |
| sub_ORF1a_A3143V | 3 | 0,7% | 2 |  |  |  | 0,7% | 1 | 1,49 | 0,19 | 11,40 | 0,8% | 0,702 | 0,859 | 1,000 |  |
| sub_S_T95I | 3 | 0,7% | 2 |  |  |  | 0,7% | 1 | 1,49 | 0,19 | 11,40 | 0,8% | 0,702 | 0,859 | 1,000 |  |
| sub_ORF1a_T1597I | 3 | 0,7% | 2 |  |  |  | 0,7% | 1 | 1,49 | 0,19 | 11,40 | 0,8% | 0,702 | 0,859 | 1,000 |  |
| sub_ORF1a_K1202N | 3 | 0,7% | 2 |  |  |  | 0,7% | 1 | 1,49 | 0,19 | 11,40 | 0,8% | 0,702 | 0,859 | 1,000 |  |
| ins__11082__T | 3 | 0,7% | 2 |  |  |  | 0,7% | 1 | 1,49 | 0,19 | 11,40 | 0,8% | 0,702 | 0,859 | 1,000 |  |
| sub_ORF1b_E2279K | 3 | 0,7% | 2 |  |  |  | 0,7% | 1 | 1,49 | 0,19 | 11,40 | 0,8% | 0,702 | 0,859 | 1,000 |  |
| sub_S_H69P | 3 | 0,7% | 2 |  |  |  | 0,7% | 1 | 1,49 | 0,19 | 11,40 | 0,8% | 0,702 | 0,859 | 1,000 |  |
| sub_N_P199L | 3 | 0,7% | 2 |  |  |  | 0,7% | 1 | 1,49 | 0,19 | 11,40 | 0,8% | 0,702 | 0,859 | 1,000 |  |
| sub_ORF1a_H1113Y | 3 | 0,7% | 2 |  |  |  | 0,7% | 1 | 1,49 | 0,19 | 11,40 | 0,8% | 0,702 | 0,859 | 1,000 |  |
| sub_ORF3a_Q38R | 3 | 0,7% | 2 |  |  |  | 0,7% | 1 | 1,49 | 0,19 | 11,40 | 0,8% | 0,702 | 0,859 | 1,000 |  |
| sub_ORF3a_G172R | 3 | 0,7% | 2 |  |  |  | 0,7% | 1 | 1,49 | 0,19 | 11,40 | 0,8% | 0,702 | 0,859 | 1,000 |  |
| sub_ORF3a_G172C | 3 | 0,7% | 2 |  |  |  | 0,7% | 1 | 1,49 | 0,19 | 11,40 | 0,8% | 0,702 | 0,859 | 1,000 |  |
| sub_N_P13S | 3 | 0,7% | 2 |  |  |  | 0,7% | 1 | 1,49 | 0,19 | 11,40 | 0,8% | 0,702 | 0,859 | 1,000 |  |
| sub_N_S197T | 3 | 0,7% | 2 |  |  |  | 0,7% | 1 | 1,49 | 0,19 | 11,40 | 0,8% | 0,702 | 0,859 | 1,000 |  |
| sub_S_D138Y | 3 | 0,7% | 2 |  |  |  | 0,7% | 1 | 1,49 | 0,19 | 11,40 | 0,8% | 0,702 | 0,859 | 1,000 |  |
| sub_ORF1a_S2132G | 3 | 0,7% | 2 |  |  |  | 0,7% | 1 | 1,49 | 0,19 | 11,40 | 0,8% | 0,702 | 0,859 | 1,000 |  |
| sub_ORF1a_N1662S | 3 | 0,7% | 2 |  |  |  | 0,7% | 1 | 1,49 | 0,19 | 11,40 | 0,8% | 0,702 | 0,859 | 1,000 |  |
| sub_S_M153T | 3 | 0,7% | 2 |  |  |  | 0,7% | 1 | 1,49 | 0,19 | 11,40 | 0,8% | 0,702 | 0,859 | 1,000 |  |
| sub_N_P151L | 3 | 0,7% | 2 |  |  |  | 0,7% | 1 | 1,49 | 0,19 | 11,40 | 0,8% | 0,702 | 0,859 | 1,000 |  |
| sub_ORF7a_A105T | 3 | 0,7% | 2 |  |  |  | 0,7% | 1 | 1,49 | 0,19 | 11,40 | 0,8% | 0,702 | 0,859 | 1,000 |  |
| sub_S_N148D | 3 | 0,7% | 2 |  |  |  | 0,7% | 1 | 1,49 | 0,19 | 11,40 | 0,8% | 0,702 | 0,859 | 1,000 |  |
| sub_N_R203K | 168 | 40,9% | 119 |  |  |  | 40,6% | 49 | 1,04 | 0,67 | 1,60 | 41,5% | 0,859 | 0,865 | 0,912 |  |
| sub_ORF1a_V3718F | 4 | 1,0% | 3 |  |  |  | 1,0% | 1 | 1,06 | 0,15 | 7,26 | 0,8% | 0,953 | 0,869 | 1,000 |  |
| sub_ORF1b_D1572N | 4 | 1,0% | 3 |  |  |  | 1,0% | 1 | 1,06 | 0,15 | 7,26 | 0,8% | 0,953 | 0,869 | 1,000 |  |
| sub_ORF3a_A99S | 4 | 1,0% | 3 |  |  |  | 1,0% | 1 | 1,06 | 0,15 | 7,26 | 0,8% | 0,953 | 0,869 | 1,000 |  |
| sub_S_D614N | 4 | 1,0% | 3 |  |  |  | 1,0% | 1 | 1,06 | 0,15 | 7,26 | 0,8% | 0,953 | 0,869 | 1,000 |  |
| sub_ORF1a_R3574G | 4 | 1,0% | 3 |  |  |  | 1,0% | 1 | 1,06 | 0,15 | 7,26 | 0,8% | 0,953 | 0,869 | 1,000 |  |
| sub_ORF1a_M3934I | 4 | 1,0% | 3 |  |  |  | 1,0% | 1 | 1,06 | 0,15 | 7,26 | 0,8% | 0,953 | 0,869 | 1,000 |  |
| sub_ORF8_A65S | 4 | 1,0% | 3 |  |  |  | 1,0% | 1 | 1,06 | 0,15 | 7,26 | 0,8% | 0,953 | 0,869 | 1,000 |  |
| sub_ORF3a_V202L | 4 | 1,0% | 3 |  |  |  | 1,0% | 1 | 1,06 | 0,15 | 7,26 | 0,8% | 0,953 | 0,869 | 1,000 |  |
| sub_ORF1a_T1638I | 4 | 1,0% | 3 |  |  |  | 1,0% | 1 | 1,06 | 0,15 | 7,26 | 0,8% | 0,953 | 0,869 | 1,000 |  |
| sub_ORF1b_T76I | 4 | 1,0% | 3 |  |  |  | 1,0% | 1 | 1,06 | 0,15 | 7,26 | 0,8% | 0,953 | 0,869 | 1,000 |  |
| sub_ORF1a_T4175I | 4 | 1,0% | 3 |  |  |  | 1,0% | 1 | 1,06 | 0,15 | 7,26 | 0,8% | 0,953 | 0,869 | 1,000 |  |
| sub_ORF3a_S40L | 4 | 1,0% | 3 |  |  |  | 1,0% | 1 | 1,06 | 0,15 | 7,26 | 0,8% | 0,953 | 0,869 | 1,000 |  |
| sub_M_A2S | 4 | 1,0% | 3 |  |  |  | 1,0% | 1 | 1,06 | 0,15 | 7,26 | 0,8% | 0,953 | 0,869 | 1,000 |  |
| sub_S_L242H | 11 | 2,7% | 8 |  |  |  | 2,7% | 3 | 1,02 | 0,29 | 3,60 | 2,5% | 0,978 | 0,915 | 1,000 |  |
| del_S_H245m | 11 | 2,7% | 8 |  |  |  | 2,7% | 3 | 1,02 | 0,29 | 3,60 | 2,5% | 0,978 | 0,915 | 1,000 |  |
| sub_M_N207Y | 10 | 2,4% | 7 |  |  |  | 2,4% | 3 | 1,16 | 0,32 | 4,19 | 2,5% | 0,824 | 0,927 | 1,000 |  |
| sub_N_D3P | 10 | 2,4% | 7 |  |  |  | 2,4% | 3 | 1,16 | 0,32 | 4,19 | 2,5% | 0,824 | 0,927 | 1,000 |  |
| sub_E_P71L | 18 | 4,4% | 13 |  |  |  | 4,4% | 5 | 1,01 | 0,36 | 2,78 | 4,2% | 0,989 | 0,929 | 1,000 |  |
| sub_ORF1b_P314L | 394 | 95,9% | 281 |  |  |  | 95,9% | 113 | 0,92 | 0,33 | 2,56 | 95,8% | 0,868 | 0,948 | 1,000 |  |
| sub_ORF1a_E1363G | 17 | 4,1% | 12 |  |  |  | 4,1% | 5 | 1,09 | 0,39 | 3,05 | 4,2% | 0,868 | 0,948 | 1,000 |  |
| sub_N_G204R | 168 | 40,9% | 120 |  |  |  | 41,0% | 48 | 0,99 | 0,64 | 1,53 | 40,7% | 0,966 | 0,959 | 1,000 |  |
| sub_ORF1b_P218L | 24 | 5,8% | 17 |  |  |  | 5,8% | 7 | 1,06 | 0,44 | 2,57 | 5,9% | 0,893 | 0,959 | 1,000 |  |
| sub_ORF1a_K3353R | 21 | 5,1% | 15 |  |  |  | 5,1% | 6 | 1,04 | 0,40 | 2,66 | 5,1% | 0,938 | 0,988 | 1,000 |  |
| sub_S_Q677H | 7 | 1,7% | 5 |  |  |  | 1,7% | 2 | 1,13 | 0,25 | 5,10 | 1,7% | 0,878 | 0,993 | 1,000 |  |
| sub_ORF1a_N2596S | 7 | 1,7% | 5 |  |  |  | 1,7% | 2 | 1,13 | 0,25 | 5,10 | 1,7% | 0,878 | 0,993 | 1,000 |  |
| sub_ORF1a_A3456V | 7 | 1,7% | 5 |  |  |  | 1,7% | 2 | 1,13 | 0,25 | 5,10 | 1,7% | 0,878 | 0,993 | 1,000 |  |
| sub_ORF1a_A2320V | 7 | 1,7% | 5 |  |  |  | 1,7% | 2 | 1,13 | 0,25 | 5,10 | 1,7% | 0,878 | 0,993 | 1,000 |  |
| sub_N_K169N | 411 | 100,0% | 293 | 1,00 |  |  | 100,0% | 118 | 1,00 |  |  | 100,0% | No test possible |  |  |  |
| sub_N_G170R | 411 | 100,0% | 293 | 1,00 |  |  | 100,0% | 118 | 1,00 |  |  | 100,0% | No test possible |  |  |  |
| sub_ORF1a_V2453G | 411 | 100,0% | 293 | 1,00 |  |  | 100,0% | 118 | 1,00 |  |  | 100,0% | No test possible |  |  |  |
| sub_ORF1a_N2454S | 411 | 100,0% | 293 | 1,00 |  |  | 100,0% | 118 | 1,00 |  |  | 100,0% | No test possible |  |  |  |
| sub_ORF1a_N3466K | 411 | 100,0% | 293 | 1,00 |  |  | 100,0% | 118 | 1,00 |  |  | 100,0% | No test possible |  |  |  |
| sub_ORF1b_N377S | 411 | 100,0% | 293 | 1,00 |  |  | 100,0% | 118 | 1,00 |  |  | 100,0% | No test possible |  |  |  |
| sub_M_L17F | 411 | 100,0% | 293 | 1,00 |  |  | 100,0% | 118 | 1,00 |  |  | 100,0% | No test possible |  |  |  |
| sub_ORF1a_A541V | 411 | 100,0% | 293 | 1,00 |  |  | 100,0% | 118 | 1,00 |  |  | 100,0% | No test possible |  |  |  |
| sub_ORF1b_T2376I | 411 | 100,0% | 293 | 1,00 |  |  | 100,0% | 118 | 1,00 |  |  | 100,0% | No test possible |  |  |  |
| sub_ORF1a_L853F | 411 | 100,0% | 293 | 1,00 |  |  | 100,0% | 118 | 1,00 |  |  | 100,0% | No test possible |  |  |  |
| sub_ORF8_Q91H | 411 | 100,0% | 293 | 1,00 |  |  | 100,0% | 118 | 1,00 |  |  | 100,0% | No test possible |  |  |  |
| del_ORF8_E92m | 411 | 100,0% | 293 | 1,00 |  |  | 100,0% | 118 | 1,00 |  |  | 100,0% | No test possible |  |  |  |
| del_ORF8_P93m | 411 | 100,0% | 293 | 1,00 |  |  | 100,0% | 118 | 1,00 |  |  | 100,0% | No test possible |  |  |  |
| del_ORF8_K94m | 411 | 100,0% | 293 | 1,00 |  |  | 100,0% | 118 | 1,00 |  |  | 100,0% | No test possible |  |  |  |
| del_ORF8_L95m | 411 | 100,0% | 293 | 1,00 |  |  | 100,0% | 118 | 1,00 |  |  | 100,0% | No test possible |  |  |  |
| del_ORF8_G96m | 411 | 100,0% | 293 | 1,00 |  |  | 100,0% | 118 | 1,00 |  |  | 100,0% | No test possible |  |  |  |
| del_ORF8_S97m | 411 | 100,0% | 293 | 1,00 |  |  | 100,0% | 118 | 1,00 |  |  | 100,0% | No test possible |  |  |  |
| del_ORF8_L98m | 411 | 100,0% | 293 | 1,00 |  |  | 100,0% | 118 | 1,00 |  |  | 100,0% | No test possible |  |  |  |
| del_ORF8_V99m | 411 | 100,0% | 293 | 1,00 |  |  | 100,0% | 118 | 1,00 |  |  | 100,0% | No test possible |  |  |  |
| del_ORF8_V100m | 411 | 100,0% | 293 | 1,00 |  |  | 100,0% | 118 | 1,00 |  |  | 100,0% | No test possible |  |  |  |
| del_ORF8_R101m | 411 | 100,0% | 293 | 1,00 |  |  | 100,0% | 118 | 1,00 |  |  | 100,0% | No test possible |  |  |  |
| del_ORF8_C102m | 411 | 100,0% | 293 | 1,00 |  |  | 100,0% | 118 | 1,00 |  |  | 100,0% | No test possible |  |  |  |
| del_ORF8_S103m | 411 | 100,0% | 293 | 1,00 |  |  | 100,0% | 118 | 1,00 |  |  | 100,0% | No test possible |  |  |  |
| del_ORF8_F104m | 411 | 100,0% | 293 | 1,00 |  |  | 100,0% | 118 | 1,00 |  |  | 100,0% | No test possible |  |  |  |
| del_ORF8_Y105m | 411 | 100,0% | 293 | 1,00 |  |  | 100,0% | 118 | 1,00 |  |  | 100,0% | No test possible |  |  |  |
| del_ORF8_E106m | 411 | 100,0% | 293 | 1,00 |  |  | 100,0% | 118 | 1,00 |  |  | 100,0% | No test possible |  |  |  |
| del_ORF8_D107m | 411 | 100,0% | 293 | 1,00 |  |  | 100,0% | 118 | 1,00 |  |  | 100,0% | No test possible |  |  |  |
| del_ORF8_F108m | 411 | 100,0% | 293 | 1,00 |  |  | 100,0% | 118 | 1,00 |  |  | 100,0% | No test possible |  |  |  |
| del_ORF8_L109m | 411 | 100,0% | 293 | 1,00 |  |  | 100,0% | 118 | 1,00 |  |  | 100,0% | No test possible |  |  |  |
| del_ORF8_E110m | 411 | 100,0% | 293 | 1,00 |  |  | 100,0% | 118 | 1,00 |  |  | 100,0% | No test possible |  |  |  |
| del_ORF8_Y111m | 411 | 100,0% | 293 | 1,00 |  |  | 100,0% | 118 | 1,00 |  |  | 100,0% | No test possible |  |  |  |
| sub_ORF1b_S1661N | 411 | 100,0% | 293 | 1,00 |  |  | 100,0% | 118 | 1,00 |  |  | 100,0% | No test possible |  |  |  |
| sub_ORF1b_P1967L | 411 | 100,0% | 293 | 1,00 |  |  | 100,0% | 118 | 1,00 |  |  | 100,0% | No test possible |  |  |  |
| sub_ORF1a_L2620V | 411 | 100,0% | 293 | 1,00 |  |  | 100,0% | 118 | 1,00 |  |  | 100,0% | No test possible |  |  |  |
